# Supplementary material for: Medical and genetic correlates of long-term buprenorphine treatment in the electronic health records
Source: Transl Psychiatry. 2024 Jan 10;14:20. doi: 10.1038/s41398-023-02713-x (PMC10781771; doi:10.1038/s41398-023-02713-x)
Supplement: Supplementary file 1 — Supplementary material [file 41398_2023_2713_MOESM1_ESM.xlsx]

## Sheet: Contents
Contents
Supplementary table 1	Keywords used to identify buprenorphine prescriptions
Supplementary table 2	PheWAS of buprenorphine duration (less than 6 months vs. greater or equal to 6 months)
Supplementary table 3	PheWAS of buprenorphine duration (less than 6 months vs. greater or equal to 6 months) adjusting for pain-related phenotypes
Supplementary table 4	PheWAS of presence vs. absence of a buprenorphine prescription

## Sheet: Supplementary table 1
Supplementary table 1. Keywords used to identify buprenorphine prescriptions
buprenorhine
bunavail
suboxone
zubsolv
buprenex
probuphine
sublocade
bunavail
cassipa

## Sheet: Supplementary table 2
Supplementary table 2: PheWAS of buprenorphine duration (less than 6 months vs. greater or equal to 6 months)
phenotype	Standard Error	Odds Ratio	lower 95% CI	upper 95% CI	p-value	n_total	n_cases	n_controls	bonferroni	description	group
316	0.135132	22.1436	21.8787	22.4085	2.7792e-116	7046	2913	4133	TRUE	Substance addiction and disorders	mental disorders
318	0.140793	23.405	23.129	23.6809	4.47686e-111	5716	1583	4133	TRUE	Tobacco use disorder	mental disorders
296.1	0.111942	9.70108	9.48168	9.92049	1.33108e-91	4731	1132	3599	TRUE	Bipolar	mental disorders
300.9	0.119002	10.0068	9.77352	10.24	1.85852e-83	4550	951	3599	TRUE	Posttraumatic stress disorder	mental disorders
296	0.0987866	6.67547	6.48185	6.86909	2.63736e-82	6230	2631	3599	TRUE	Mood disorders	mental disorders
317	0.156329	17.8453	17.5388	18.1517	7.03144e-76	5021	888	4133	TRUE	Alcohol-related disorders	mental disorders
300	0.10076	6.38955	6.19206	6.58704	1.15862e-75	5769	2170	3599	TRUE	Anxiety disorders	mental disorders
296.2	0.103757	6.26103	6.05766	6.46439	6.05707e-70	5411	1812	3599	TRUE	Depression	mental disorders
296.22	0.10965	6.94802	6.7331	7.16293	6.12432e-70	4863	1264	3599	TRUE	Major depressive disorder	mental disorders
297.1	0.123075	8.28105	8.03982	8.52227	3.99551e-66	4353	754	3599	TRUE	Suicidal ideation	mental disorders
297	0.12113	7.84792	7.6105	8.08533	7.09312e-65	4414	815	3599	TRUE	Suicidal ideation or attempt	mental disorders
306.1	0.185281	22.7801	22.417	23.1433	7.34574e-64	3912	313	3599	TRUE	Mental disorders durring/after pregnancy	mental disorders
317.1	0.1712	17.6186	17.283	17.9541	4.95594e-63	4693	560	4133	TRUE	Alcoholism	mental disorders
300.1	0.106868	5.90099	5.69153	6.11045	5.86082e-62	5083	1484	3599	TRUE	Anxiety disorder	mental disorders
70.3	0.094225	4.26606	4.08138	4.45074	1.74037e-53	5899	648	5251	TRUE	Viral hepatitis C	infectious diseases
70	0.0927085	4.15034	3.96863	4.33205	3.47511e-53	5927	676	5251	TRUE	Viral hepatitis	infectious diseases
465	0.12023	0.16929	0	0.40494	2.19085e-49	6243	2945	3298	TRUE	Acute upper respiratory infections of multiple or unspecified sites	respiratory
301	0.170212	11.3185	10.9849	11.6521	4.14817e-46	3840	241	3599	TRUE	Personality disorders	mental disorders
649	0.125675	5.81882	5.5725	6.06514	1.29679e-44	7578	383	7195	TRUE	Other conditions or status of the mother complicating pregnancy, childbirth, or the puerperium	pregnancy complications
301.2	0.198398	12.9732	12.5843	13.362	3.56841e-38	3761	162	3599	TRUE	Antisocial/borderline personality disorder	mental disorders
655	0.115184	4.0768	3.85104	4.30256	3.08404e-34	7615	465	7150	TRUE	Known or suspected fetal abnormality affecting management of mother	pregnancy complications
465.2	0.14906	0.162937	0	0.455094	4.36847e-34	5107	1809	3298	TRUE	Acute pharyngitis	respiratory
295	0.171308	7.89307	7.55731	8.22884	1.71692e-33	3835	236	3599	TRUE	Schizophrenia and other psychotic disorders	mental disorders
647	0.203316	10.4139	10.0154	10.8124	9.9149e-31	7603	147	7456	TRUE	Infectious and parasitic complications affecting pregnancy	pregnancy complications
300.11	0.165997	6.31882	5.99346	6.64417	1.17551e-28	3912	313	3599	TRUE	Generalized anxiety disorder	mental disorders
304	0.167609	6.39999	6.07148	6.7285	1.65521e-28	3891	292	3599	TRUE	Adjustment reaction	mental disorders
464	0.214342	0.100618	0	0.520728	8.7652e-27	4146	848	3298	TRUE	Acute sinusitis	respiratory
655.1	0.162794	5.69637	5.37729	6.01544	1.16734e-26	7355	205	7150	TRUE	Abnormality in fetal heart rate or rhythm	pregnancy complications
646	0.179695	6.29352	5.94132	6.64573	1.35518e-24	7641	171	7470	TRUE	Other complications of pregnancy NEC	pregnancy complications
338.2	0.0960968	2.33176	2.14341	2.52011	1.25029e-18	6920	742	6178	TRUE	Chronic pain	neurological
338	0.0843536	1.98571	1.82037	2.15104	4.21807e-16	7245	1067	6178	TRUE	Pain	neurological
300.12	0.194932	4.44086	4.05879	4.82293	2.04082e-14	3808	209	3599	TRUE	Agorophobia, social phobia, and panic disorder	mental disorders
636	0.139432	2.8656	2.59231	3.13888	4.33637e-14	7465	293	7172	TRUE	Early or threatened labor; hemorrhage in early pregnancy	pregnancy complications
476	0.197508	0.231854	0	0.618969	1.35716e-13	5723	876	4847	TRUE	Allergic rhinitis	respiratory
291	0.142362	2.82663	2.5476	3.10566	2.90215e-13	6829	262	6567	TRUE	Other specified nonpsychotic and/or transient mental disorders	mental disorders
41	0.10809	2.10432	1.89247	2.31618	5.85675e-12	7456	483	6973	TRUE	Bacterial infection NOS	infectious diseases
300.4	0.219282	4.4785	4.04871	4.90829	8.07134e-12	3762	163	3599	TRUE	Dysthymic disorder	mental disorders
681.3	0.148816	2.72132	2.42964	3.01299	1.7293e-11	6304	235	6069	TRUE	Cellulitis and abscess of arm/hand	dermatologic
381	0.277813	0.162899	0	0.707412	6.49707e-11	6740	699	6041	TRUE	Otitis media and Eustachian tube disorders	sense organs
785	0.0772392	1.63327	1.48189	1.78466	2.13196e-10	6358	1648	4710	TRUE	Abdominal pain	symptoms
306	0.213805	3.72648	3.30743	4.14554	7.62068e-10	3766	167	3599	TRUE	Other mental disorder	mental disorders
782.3	0.134395	2.26406	2.00065	2.52748	1.19958e-09	7447	327	7120	TRUE	Edema	symptoms
642	0.189571	3.15293	2.78137	3.52449	1.38211e-09	7867	140	7727	TRUE	Hypertension complicating pregnancy, childbirth, and the puerperium	pregnancy complications
771.1	0.123349	2.1052	1.86344	2.34697	1.58962e-09	7508	364	7144	TRUE	Swelling of limb	symptoms
681	0.097832	1.78683	1.59508	1.97858	2.97308e-09	6766	697	6069	TRUE	Superficial cellulitis and abscess	dermatologic
295.3	0.238555	4.10305	3.63548	4.57061	3.26202e-09	3717	118	3599	TRUE	Psychosis	mental disorders
276	0.0902388	1.69634	1.51947	1.87321	4.73064e-09	7027	862	6165	TRUE	Disorders of fluid, electrolyte, and acid-base balance	endocrine/metabolic
303	0.257882	4.48889	3.98344	4.99434	5.7858e-09	3702	103	3599	TRUE	Psychogenic and somatoform disorders	mental disorders
338.1	0.106134	1.84393	1.63591	2.05195	8.14841e-09	6789	611	6178	TRUE	Acute pain	neurological
681.5	0.153952	2.4195	2.11776	2.72125	9.51195e-09	6293	224	6069	TRUE	Cellulitis and abscess of leg, except foot	dermatologic
960	0.181842	2.81477	2.45836	3.17118	1.26223e-08	6444	144	6300	TRUE	Poisoning by antibiotics	injuries & poisonings
798	0.0839064	1.61185	1.44739	1.7763	1.27454e-08	6592	1331	5261	TRUE	Malaise and fatigue	symptoms
653	0.20568	3.07389	2.67076	3.47703	4.76989e-08	7647	113	7534	TRUE	Problems associated with amniotic cavity and membranes	pregnancy complications
710	0.183976	2.71685	2.35626	3.07744	5.55303e-08	7280	146	7134	TRUE	Osteomyelitis, periostitis, and other infections involving bone	musculoskeletal
345	0.118384	1.8835	1.65147	2.11553	8.88673e-08	7028	416	6612	TRUE	Epilepsy, recurrent seizures, convulsions	neurological
276.1	0.107406	1.75264	1.54212	1.96315	1.74782e-07	6735	570	6165	TRUE	Electrolyte imbalance	endocrine/metabolic
41.1	0.137943	2.04486	1.7745	2.31523	2.15203e-07	7252	279	6973	TRUE	Staphylococcus infections	infectious diseases
54	0.221053	3.07334	2.64008	3.5066	3.79082e-07	5361	110	5251	TRUE	Herpes simplex	infectious diseases
285	0.103033	1.68336	1.48141	1.8853	4.31266e-07	7175	651	6524	TRUE	Other anemias	hematopoietic
297.2	0.247391	3.47028	2.9854	3.95517	4.91957e-07	3721	122	3599	TRUE	Suicide or self-inflicted injury	mental disorders
789	0.0940994	1.60106	1.41662	1.78549	5.6802e-07	6638	847	5791	TRUE	Nausea and vomiting	symptoms
381.1	0.366099	0.163002	0	0.880556	7.23568e-07	6566	525	6041	TRUE	Otitis media	sense organs
508	0.126877	1.8665	1.61782	2.11518	8.71299e-07	7140	376	6764	TRUE	Pulmonary collapse; interstitial and compensatory emphysema	respiratory
276.5	0.11679	1.77228	1.54338	2.00119	9.58407e-07	6634	469	6165	TRUE	Hypovolemia	endocrine/metabolic
292.4	0.123335	1.81909	1.57736	2.06083	1.22639e-06	6969	402	6567	TRUE	Altered mental status	mental disorders
276.14	0.128078	1.84503	1.59399	2.09606	1.73387e-06	6533	368	6165	TRUE	Hypopotassemia	endocrine/metabolic
38	0.125702	1.80532	1.55894	2.05169	2.60789e-06	7336	363	6973	TRUE	Septicemia	infectious diseases
345.3	0.131255	1.84943	1.59217	2.10668	2.80513e-06	6951	339	6612	TRUE	Convulsions	neurological
994	0.132809	1.86229	1.60199	2.1226	2.84104e-06	7867	304	7563	TRUE	Sepsis and SIRS	injuries & poisonings
512.8	0.115982	0.584987	0.357662	0.812312	3.78546e-06	5386	1227	4159	TRUE	Cough	respiratory
401.1	0.0885469	1.5036	1.33005	1.67715	4.10188e-06	7449	1417	6032	TRUE	Essential hypertension	circulatory system
292	0.109927	1.64615	1.43069	1.8616	5.78016e-06	7112	545	6567	TRUE	Neurological disorders	mental disorders
41.11	0.193051	2.37847	2.00009	2.75685	7.18228e-06	7110	137	6973	TRUE	Methicillin sensitive Staphylococcus aureus	infectious diseases
381.11	0.391512	0.173069	0	0.940432	7.45611e-06	6521	480	6041	TRUE	Suppurative and unspecified otitis media	sense organs
401	0.0881528	1.48367	1.31089	1.65645	7.6264e-06	7461	1429	6032	TRUE	Hypertension	circulatory system
381.2	0.509894	0.102852	0	1.10224	8.17059e-06	6298	257	6041	TRUE	Eustachian tube disorders	sense organs
496	0.156306	1.97567	1.66931	2.28203	1.32314e-05	6594	251	6343	TRUE	Chronic airway obstruction	respiratory
291.8	0.172149	2.09994	1.76253	2.43735	1.63475e-05	6754	187	6567	TRUE	Alteration of consciousness	mental disorders
41.12	0.179918	2.13211	1.77947	2.48475	2.57533e-05	7127	154	6973	TRUE	Methicillin resistant Staphylococcus aureus	infectious diseases
994.2	0.138893	1.79019	1.51796	2.06242	2.75803e-05	7842	279	7563	TRUE	Sepsis	injuries & poisonings
483	0.204923	0.430094	0.0284453	0.831742	3.83139e-05	5968	500	5468	FALSE	Acute bronchitis and bronchiolitis	respiratory
729	0.142434	1.78687	1.5077	2.06604	4.59492e-05	6601	267	6334	FALSE	Other disorders of soft tissues	musculoskeletal
760	0.0834029	1.40112	1.23766	1.56459	5.25634e-05	6555	1375	5180	FALSE	Back pain	symptoms
710.1	0.203495	2.26455	1.8657	2.6634	5.9024e-05	7256	122	7134	FALSE	Osteomyelitis	musculoskeletal
427.7	0.12349	1.63831	1.39627	1.88035	6.39788e-05	6473	399	6074	FALSE	Tachycardia NOS	circulatory system
509	0.124945	1.64003	1.39513	1.88492	7.51255e-05	7157	393	6764	FALSE	Respiratory failure, insufficiency, arrest	respiratory
355.1	0.174413	1.98784	1.64599	2.32969	8.17515e-05	7246	192	7054	FALSE	Chronic pain syndrome	neurological
686	0.187147	2.08743	1.72062	2.45424	8.41048e-05	6226	157	6069	FALSE	Other local infections of skin and subcutaneous tissue	dermatologic
571	0.154626	1.83094	1.52787	2.134	9.17082e-05	7336	246	7090	FALSE	Chronic liver disease and cirrhosis	digestive
285.1	0.158375	1.84007	1.52966	2.15049	0.000117929	6747	223	6524	FALSE	Acute posthemorrhagic anemia	hematopoietic
574.1	0.238642	2.4881	2.02037	2.95584	0.000133659	7692	102	7590	FALSE	Cholelithiasis	digestive
579	0.164371	1.84363	1.52146	2.1658	0.000197907	6993	203	6790	FALSE	Other symptoms involving abdomen and pelvis	digestive
585	0.12879	1.61265	1.36022	1.86508	0.000206844	7420	376	7044	FALSE	Renal failure	genitourinary
980	0.18552	1.98786	1.62424	2.35148	0.000212708	7825	146	7679	FALSE	Encounter for long-term (current) use of antibiotics	infectious diseases
428.1	0.199807	2.0854	1.69378	2.47702	0.000234752	7615	144	7471	FALSE	Congestive heart failure (CHF) NOS	circulatory system
571.5	0.160949	1.80001	1.48455	2.11547	0.000260173	7319	229	7090	FALSE	Other chronic nonalcoholic liver disease	digestive
574	0.21361	2.15717	1.73849	2.57584	0.000319354	7720	130	7590	FALSE	Cholelithiasis and cholecystitis	digestive
481	0.371028	0.265526	0	0.992742	0.000351616	5669	201	5468	FALSE	Influenza	respiratory
38.3	0.172432	1.84789	1.50992	2.18585	0.000369353	7159	186	6973	FALSE	Bacteremia	infectious diseases
585.1	0.136234	1.61615	1.34913	1.88317	0.000425587	7367	323	7044	FALSE	Acute renal failure	genitourinary
420	0.206297	2.04169	1.63734	2.44603	0.000540293	7783	121	7662	FALSE	Carditis	circulatory system
428	0.174592	1.829	1.4868	2.1712	0.000543865	7671	200	7471	FALSE	Congestive heart failure; nonhypertensive	circulatory system
312	0.213291	2.08491	1.66686	2.50296	0.000571655	7030	124	6906	FALSE	Conduct disorders	mental disorders
977	0.204063	2.00367	1.6037	2.40363	0.000659931	6428	128	6300	FALSE	Personal history of allergy to medicinal agents	injuries & poisonings
800.3	0.222921	2.12434	1.68741	2.56126	0.000725038	6225	111	6114	FALSE	Fracture of tibia and fibula	injuries & poisonings
509.3	0.228375	2.16025	1.71263	2.60786	0.000744568	6868	104	6764	FALSE	Pulmonary insufficiency or respiratory failure following trauma and surgery	respiratory
819	0.174206	1.79922	1.45778	2.14067	0.000747319	7473	184	7289	FALSE	Skull and face fracture and other intercranial injury	injuries & poisonings
979	0.178499	1.81934	1.46949	2.1692	0.000799903	6482	182	6300	FALSE	Adverse drug events and drug allergies	injuries & poisonings
619	0.179404	1.80946	1.45783	2.1611	0.000947909	7563	184	7379	FALSE	Noninflammatory female genital disorders	genitourinary
288	0.147755	1.62789	1.33829	1.91749	0.000973968	6984	265	6719	FALSE	Diseases of white blood cells	hematopoietic
418	0.0888757	1.3405	1.1663	1.5147	0.000976499	6790	1142	5648	FALSE	Nonspecific chest pain	circulatory system
474	0.270522	0.411627	0	0.941851	0.00103368	5213	366	4847	FALSE	Acute and chronic tonsillitis	respiratory
427.5	0.17087	1.74802	1.41312	2.08292	0.00108127	6272	198	6074	FALSE	Arrhythmia (cardiac) NOS	circulatory system
250.4	0.214697	2.01313	1.59232	2.43393	0.00111819	7259	117	7142	FALSE	Abnormal glucose	endocrine/metabolic
276.13	0.222744	2.06107	1.62449	2.49765	0.00116674	6283	118	6165	FALSE	Hyperpotassemia	endocrine/metabolic
571.51	0.223828	2.06827	1.62957	2.50697	0.0011673	7199	109	7090	FALSE	Cirrhosis of liver without mention of alcohol	digestive
382	0.398431	0.274492	0	1.05542	0.00117528	6208	167	6041	FALSE	Otalgia	sense organs
418.1	0.213114	1.99635	1.57864	2.41405	0.00117909	5773	125	5648	FALSE	Precordial pain	circulatory system
521.1	0.20205	1.91016	1.51414	2.30618	0.00135953	7189	134	7055	FALSE	Dental caries	digestive
509.1	0.145276	1.58976	1.30502	1.8745	0.00141744	7049	285	6764	FALSE	Respiratory failure	respiratory
427	0.0926223	1.34384	1.1623	1.52538	0.00141918	6997	923	6074	FALSE	Cardiac dysrhythmias	circulatory system
369	0.395909	0.283065	0	1.05905	0.0014336	6842	211	6631	FALSE	Infection of the eye	sense organs
288.2	0.15557	1.64031	1.3354	1.94523	0.00146704	6953	234	6719	FALSE	Elevated white blood cell count	hematopoietic
521	0.201436	1.87339	1.47857	2.2682	0.00183097	7191	136	7055	FALSE	Diseases of hard tissues of teeth	digestive
510	0.183596	1.75843	1.39858	2.11828	0.00211032	7670	164	7506	FALSE	Other diseases of lung	respiratory
512.7	0.10217	1.36553	1.16528	1.56578	0.00229405	4916	757	4159	FALSE	Shortness of breath	respiratory
313.1	0.162534	1.63037	1.31181	1.94894	0.00263473	7222	316	6906	FALSE	Attention deficit hyperactivity disorder	mental disorders
371	0.353068	0.345967	0	1.03798	0.00264489	6802	171	6631	FALSE	Inflammation of the eye	sense organs
470	0.336323	0.366259	0	1.02545	0.00282234	5023	176	4847	FALSE	Septal Deviations/Turbinate Hypertrophy	respiratory
375.1	0.375055	0.326737	0	1.06184	0.00285905	7435	191	7244	FALSE	Dry eyes	sense organs
276.12	0.183973	1.7302	1.36961	2.09079	0.00288254	6346	181	6165	FALSE	Hyposmolality and/or hyponatremia	endocrine/metabolic
512.9	0.116971	1.41129	1.18203	1.64056	0.00322734	4684	525	4159	FALSE	Other dyspnea	respiratory
389	0.277381	0.443149	0	0.986816	0.00334573	7602	214	7388	FALSE	Hearing loss	sense organs
369.5	0.427404	0.289296	0	1.12701	0.0037085	6824	193	6631	FALSE	Conjunctivitis, infectious	sense organs
426	0.197554	1.75497	1.36777	2.14218	0.00441215	6224	150	6074	FALSE	Cardiac conduction disorders	circulatory system
452	0.173128	1.63528	1.29595	1.97461	0.00450081	7245	182	7063	FALSE	Other venous embolism and thrombosis	circulatory system
507	0.160951	1.57545	1.25998	1.89091	0.00474155	6999	235	6764	FALSE	Pleurisy; pleural effusion	respiratory
345.1	0.231729	1.90565	1.45146	2.35984	0.00539141	6718	106	6612	FALSE	Epilepsy	neurological
530.1	0.101166	1.32188	1.1236	1.52017	0.00580813	7004	828	6176	FALSE	Esophagitis, GERD and related diseases	digestive
594.1	0.179337	1.63825	1.28675	1.98975	0.00591362	7672	178	7494	FALSE	Calculus of kidney	genitourinary
530	0.0994204	1.30955	1.11469	1.50442	0.00667642	7035	859	6176	FALSE	Diseases of esophagus	digestive
474.1	0.520589	0.244403	0	1.26476	0.00680123	4993	146	4847	FALSE	Acute tonsillitis	respiratory
475	0.252849	0.505122	0.00953783	1.00071	0.00691223	5051	204	4847	FALSE	Chronic sinusitis	respiratory
313	0.157448	1.52986	1.22127	1.83846	0.00692487	7255	349	6906	FALSE	Pervasive developmental disorders	mental disorders
594	0.17177	1.57748	1.24081	1.91415	0.00796114	7689	195	7494	FALSE	Urinary calculus	genitourinary
506	0.225308	1.81801	1.37641	2.25961	0.00797796	6872	108	6764	FALSE	Empyema and pneumothorax	respiratory
916	0.202677	1.71134	1.31409	2.10858	0.0080279	6908	155	6753	FALSE	Contusion	injuries & poisonings
411	0.157843	1.51868	1.20931	1.82805	0.00811627	7622	328	7294	FALSE	Ischemic Heart Disease	circulatory system
939	0.248798	0.518177	0.0305332	1.00582	0.00823047	6685	269	6416	FALSE	Atopic/contact dermatitis due to other or unspecified	dermatologic
395	0.198241	1.68792	1.29936	2.07647	0.0082735	7485	146	7339	FALSE	Heart valve disorders	circulatory system
681.7	0.204996	1.71051	1.30872	2.1123	0.0088306	6201	132	6069	FALSE	Cellulitis and abscess of trunk	dermatologic
625	0.171397	1.5614	1.22546	1.89734	0.00933014	7409	219	7190	FALSE	Pain and other symptoms associated with female genital organs	genitourinary
416	0.206445	1.70814	1.30351	2.11278	0.00950151	7632	137	7495	FALSE	Cardiomegaly	circulatory system
530.11	0.103752	1.30737	1.10402	1.51073	0.00978731	6967	791	6176	FALSE	GERD	digestive
706	0.243556	0.534636	0.0572669	1.01201	0.010142	7463	315	7148	FALSE	Diseases of sebaceous glands	dermatologic
112	0.178393	1.58182	1.23217	1.93147	0.0101522	7072	201	6871	FALSE	Candidiasis	infectious diseases
327	0.131648	1.39995	1.14192	1.65799	0.0106006	7091	465	6626	FALSE	Sleep disorders	neurological
371.2	0.596377	0.220555	0	1.38945	0.011256	6732	101	6631	FALSE	Conjunctivitis, noninfectious	sense organs
627.2	0.47561	0.300509	0	1.2327	0.0114759	6721	122	6599	FALSE	Symptomatic menopause	genitourinary
276.41	0.176029	1.55359	1.20857	1.8986	0.0123212	6367	202	6165	FALSE	Acidosis	endocrine/metabolic
411.2	0.221659	1.73876	1.30431	2.17321	0.012574	7420	126	7294	FALSE	Myocardial infarction	circulatory system
478	0.523374	0.278921	0	1.30473	0.0147031	4949	102	4847	FALSE	Throat pain	respiratory
367.1	0.375728	0.403062	0	1.13949	0.0155885	7689	166	7523	FALSE	Myopia	sense organs
614	0.157134	1.45282	1.14483	1.7608	0.0174553	7402	297	7105	FALSE	Inflammatory diseases of female pelvic organs	genitourinary
770	0.140492	1.39358	1.11822	1.66895	0.0181637	7428	391	7037	FALSE	Myalgia and myositis unspecified	symptoms
627	0.348762	0.4389	0	1.12247	0.0182177	6768	169	6599	FALSE	Menopausal and postmenopausal disorders	genitourinary
401.2	0.253197	1.81307	1.3168	2.30934	0.0187716	6163	131	6032	FALSE	Hypertensive heart and/or renal disease	circulatory system
260	0.167799	1.48074	1.15185	1.80962	0.019318	7185	212	6973	FALSE	Protein-calorie malnutrition	endocrine/metabolic
276.4	0.172208	1.49132	1.15379	1.82884	0.0202982	6381	216	6165	FALSE	Acid-base balance disorder	endocrine/metabolic
720.1	0.269634	1.8696	1.34112	2.39808	0.0203061	6610	100	6510	FALSE	Spinal stenosis of lumbar region	musculoskeletal
458.9	0.172287	1.48485	1.14717	1.82254	0.0217611	7543	202	7341	FALSE	Hypotension NOS	circulatory system
514	0.203579	1.59168	1.19267	1.99069	0.0224248	7734	132	7602	FALSE	Abnormal findings examination of lungs	respiratory
260.2	0.228683	1.66791	1.2197	2.11613	0.0252836	7080	107	6973	FALSE	severe protein-calorie malnutrition	endocrine/metabolic
286.2	0.204172	1.57825	1.17807	1.97843	0.02542	7415	146	7269	FALSE	Encounter for long-term (current) use of anticoagulants	hematopoietic
110	0.37523	0.433099	0	1.16855	0.0257428	7005	134	6871	FALSE	Dermatophytosis / Dermatomycosis	infectious diseases
110.1	0.399883	0.414786	0	1.19856	0.0277624	6992	121	6871	FALSE	Dermatophytosis	infectious diseases
807	0.217141	1.60685	1.18126	2.03245	0.0289479	6229	115	6114	FALSE	Fracture of ribs	injuries & poisonings
577	0.228546	1.61907	1.17112	2.06702	0.035001	7868	105	7763	FALSE	Diseases of pancreas	digestive
585.3	0.233845	1.63513	1.17679	2.09346	0.0354863	7162	118	7044	FALSE	Chronic renal failure [CKD]	genitourinary
555	0.232852	1.62394	1.16755	2.08033	0.0373193	6517	107	6410	FALSE	Inflammatory bowel disease and other gastroenteritis and colitis	digestive
415	0.209799	1.54283	1.13162	1.95403	0.0387513	7621	126	7495	FALSE	Pulmonary heart disease	circulatory system
287	0.190133	1.46968	1.09702	1.84235	0.0428522	7424	155	7269	FALSE	Purpura and other hemorrhagic conditions	hematopoietic
433	0.196549	1.48654	1.10131	1.87178	0.043688	7736	172	7564	FALSE	Cerebrovascular disease	circulatory system
380.4	0.401893	0.44461	0	1.23232	0.0437112	7321	120	7201	FALSE	Impacted cerumen	sense organs
702	0.600116	0.298573	0	1.4748	0.0439905	7456	103	7353	FALSE	Degenerative skin conditions and other dermatoses	dermatologic
591	0.104233	1.23195	1.02765	1.43624	0.0453663	6721	841	5880	FALSE	Urinary tract infection	genitourinary
619.4	0.233779	1.59552	1.13732	2.05373	0.0456651	7487	108	7379	FALSE	Noninflammatory disorders of vagina	genitourinary
599.5	0.359269	0.490578	0	1.19474	0.0474479	6376	146	6230	FALSE	Frequency of urination and polyuria	genitourinary
706.1	0.313624	0.543309	0	1.15801	0.0517445	7380	232	7148	FALSE	Acne	dermatologic
714.1	0.253136	1.63291	1.13676	2.12905	0.0527267	7398	103	7295	FALSE	Rheumatoid arthritis	musculoskeletal
286	0.211382	1.50322	1.08891	1.91753	0.0538165	7397	128	7269	FALSE	Coagulation defects	hematopoietic
327.4	0.158474	1.35436	1.04375	1.66497	0.0556126	6948	322	6626	FALSE	Insomnia	neurological
458	0.162617	1.36119	1.04246	1.67992	0.0579282	7580	239	7341	FALSE	Hypotension	circulatory system
840	0.171719	0.723097	0.386527	1.05967	0.059021	6567	452	6115	FALSE	Sprains and strains	injuries & poisonings
512	0.0824102	0.856125	0.694601	1.01765	0.0594366	6043	1884	4159	FALSE	Other symptoms of respiratory system	respiratory
743.1	0.262396	1.63727	1.12297	2.15157	0.0602509	7574	108	7466	FALSE	Osteoporosis	musculoskeletal
173	0.472643	0.412952	0	1.33933	0.0613133	7695	107	7588	FALSE	Neoplasm of uncertain behavior of skin	neoplasms
474.2	0.305676	0.570001	0	1.16913	0.0659257	5093	246	4847	FALSE	Chronic tonsillitis and adenoiditis	respiratory
578.2	0.215687	1.48514	1.06239	1.90789	0.0666956	6934	144	6790	FALSE	Blood in stool	digestive
714	0.224439	1.50888	1.06898	1.94878	0.0668213	7429	134	7295	FALSE	Rheumatoid arthritis and other inflammatory polyarthropathies	musculoskeletal
452.2	0.226716	1.51085	1.06649	1.95521	0.0687253	7169	106	7063	FALSE	Deep vein thrombosis [DVT]	circulatory system
727	0.222661	0.669137	0.232721	1.10555	0.071171	6559	225	6334	FALSE	Other disorders of synovium, tendon, and bursa	musculoskeletal
801.1	0.21493	1.46938	1.04811	1.89064	0.0733689	6247	133	6114	FALSE	Fracture of foot	injuries & poisonings
495.2	0.297114	0.591934	0.00959015	1.17428	0.0775904	6482	139	6343	FALSE	Asthma with exacerbation	respiratory
737.3	0.255131	1.5616	1.06154	2.06166	0.0806388	7247	108	7139	FALSE	Kyphoscoliosis and scoliosis	musculoskeletal
614.52	0.197882	1.41284	1.02499	1.80068	0.0807258	7306	201	7105	FALSE	Vaginitis and vulvovaginitis	genitourinary
800	0.150062	1.29893	1.00481	1.59305	0.0813567	6415	301	6114	FALSE	Fracture of lower limb	injuries & poisonings
737	0.238037	1.50115	1.0346	1.9677	0.0878996	7263	124	7139	FALSE	Curvature of spine	musculoskeletal
366	0.289417	0.610962	0.0437037	1.17822	0.0886692	7863	213	7650	FALSE	Cataract	sense organs
287.3	0.197743	1.39973	1.01215	1.7873	0.0890239	7414	145	7269	FALSE	Thrombocytopenia	hematopoietic
783	0.101434	1.18784	0.98903	1.38665	0.0896907	6853	930	5923	FALSE	Fever of unknown origin	symptoms
380.1	0.407914	0.502284	0	1.3018	0.0913969	7320	119	7201	FALSE	Otitis externa	sense organs
626.13	0.371026	0.536948	0	1.26416	0.0937303	6716	117	6599	FALSE	Irregular menstrual cycle	genitourinary
411.4	0.185947	1.3621	0.997645	1.72656	0.0965292	7556	262	7294	FALSE	Coronary atherosclerosis	circulatory system
560	0.24402	1.4899	1.01162	1.96818	0.102275	6513	103	6410	FALSE	Intestinal obstruction without mention of hernia	digestive
614.5	0.178412	1.33777	0.988077	1.68745	0.102878	7350	245	7105	FALSE	Inflammatory disease of cervix, vagina, and vulva	genitourinary
578.8	0.253679	1.49879	1.00158	1.996	0.110674	6904	114	6790	FALSE	Hemorrhage of rectum and anus	digestive
244.4	0.146289	1.26082	0.974097	1.54755	0.113126	7506	386	7120	FALSE	Hypothyroidism NOS	endocrine/metabolic
720	0.221719	1.41774	0.983166	1.85231	0.115409	6674	164	6510	FALSE	Spinal stenosis	musculoskeletal
564	0.210887	0.719865	0.306527	1.1332	0.119087	6620	210	6410	FALSE	Functional digestive disorders	digestive
278	0.128912	1.2211	0.968433	1.47377	0.121255	7211	491	6720	FALSE	Overweight, obesity and other hyperalimentation	endocrine/metabolic
244	0.144009	1.24897	0.966709	1.53122	0.122645	7524	404	7120	FALSE	Hypothyroidism	endocrine/metabolic
578	0.154562	1.2683	0.965354	1.57124	0.124116	7096	306	6790	FALSE	Gastrointestinal hemorrhage	digestive
495	0.1224	1.20068	0.960781	1.44059	0.13512	6890	547	6343	FALSE	Asthma	respiratory
278.1	0.138668	1.2282	0.956407	1.49999	0.138262	7133	413	6720	FALSE	Obesity	endocrine/metabolic
726.1	0.261776	0.678794	0.165713	1.19187	0.138864	6531	197	6334	FALSE	Enthesopathy	musculoskeletal
743	0.195858	1.33557	0.951689	1.71945	0.139571	7677	211	7466	FALSE	Osteoporosis, osteopenia and pathological fracture	musculoskeletal
427.3	0.210285	1.36412	0.951962	1.77628	0.139779	6221	147	6074	FALSE	Other specified cardiac dysrhythmias	circulatory system
740.9	0.20633	1.34901	0.944607	1.75342	0.146795	7171	199	6972	FALSE	Osteoarthrosis NOS	musculoskeletal
611	0.348404	0.604897	0	1.28777	0.149061	7566	133	7433	FALSE	Abnormal findings on mammogram or breast exam	genitourinary
275	0.244386	1.41479	0.935793	1.89379	0.155664	7810	101	7709	FALSE	Disorders of mineral metabolism	endocrine/metabolic
741.4	0.24346	1.40533	0.928153	1.88252	0.162214	7000	111	6889	FALSE	Joint effusions	musculoskeletal
722.6	0.164027	1.25149	0.929995	1.57298	0.171418	6832	322	6510	FALSE	Degeneration of intervertebral disc	musculoskeletal
772.3	0.255594	0.705392	0.204427	1.20636	0.172111	7304	155	7149	FALSE	Muscle weakness	symptoms
569	0.220522	1.35062	0.918396	1.78284	0.172895	7541	134	7407	FALSE	Other disorders of intestine	digestive
599.2	0.24221	1.3896	0.914872	1.86433	0.174336	6331	101	6230	FALSE	Retention of urine	genitourinary
367	0.248584	0.714086	0.226862	1.20131	0.175518	7742	219	7523	FALSE	Disorders of refraction and accommodation; blindness and low vision	sense organs
79	0.200849	1.30992	0.916252	1.70358	0.178913	5623	372	5251	FALSE	Viral infection	infectious diseases
512.1	0.258363	0.708943	0.202553	1.21533	0.183063	4338	179	4159	FALSE	Wheezing	respiratory
315	0.257248	1.40505	0.900842	1.90925	0.186182	7009	103	6906	FALSE	Develomental delays and disorders	mental disorders
289.4	0.2442	1.38043	0.901801	1.85907	0.186763	6872	153	6719	FALSE	Lymphadenitis	hematopoietic
280	0.186308	1.26874	0.903578	1.6339	0.201394	6727	203	6524	FALSE	Iron deficiency anemias	hematopoietic
366.2	0.291184	0.691134	0.120414	1.26185	0.204552	7835	185	7650	FALSE	Senile cataract	sense organs
386.9	0.187932	0.79095	0.422604	1.1593	0.212068	7394	296	7098	FALSE	Dizziness and giddiness (Light-headedness and vertigo)	sense organs
280.1	0.195797	1.27312	0.88936	1.65688	0.217472	6707	183	6524	FALSE	Iron deficiency anemias, unspecified or not due to blood loss	hematopoietic
830	0.190642	1.26244	0.888781	1.6361	0.221547	7513	244	7269	FALSE	Dislocation	injuries & poisonings
695	0.235866	1.33075	0.868454	1.79305	0.225716	7345	131	7214	FALSE	Erythematous conditions	dermatologic
871	0.172955	1.23032	0.891324	1.56931	0.230757	6733	218	6515	FALSE	Open wounds of extremities	injuries & poisonings
512.2	0.224901	1.30385	0.863047	1.74466	0.238106	4287	128	4159	FALSE	Painful respiration	respiratory
841	0.23541	1.30352	0.84212	1.76493	0.260167	6242	127	6115	FALSE	Sprains and strains of back and neck	injuries & poisonings
497	0.300314	0.718281	0.129666	1.3069	0.270535	6473	130	6343	FALSE	Bronchitis	respiratory
727.1	0.297226	0.720782	0.138219	1.30334	0.270643	6455	121	6334	FALSE	Synovitis and tenosynovitis	musculoskeletal
726	0.172353	0.837577	0.499765	1.17539	0.303776	6752	418	6334	FALSE	Peripheral enthesopathies and allied syndromes	musculoskeletal
272.13	0.203852	0.811827	0.412276	1.21138	0.306476	7163	316	6847	FALSE	Mixed hyperlipidemia	endocrine/metabolic
628	0.230543	1.26003	0.808162	1.71189	0.316074	6717	118	6599	FALSE	Ovarian cyst	genitourinary
261	0.161369	1.17487	0.858583	1.49115	0.317957	7286	313	6973	FALSE	Vitamin deficiency	endocrine/metabolic
969	0.247408	1.27209	0.787167	1.75701	0.330693	6401	101	6300	FALSE	Poisoning by psychotropic agents	injuries & poisonings
250.3	0.213771	1.22938	0.810385	1.64837	0.334035	7295	153	7142	FALSE	Insulin pump user	endocrine/metabolic
350	0.178377	1.18765	0.838027	1.53727	0.334996	7661	215	7446	FALSE	Abnormal movement	neurological
745	0.0878174	1.08715	0.915027	1.25927	0.34135	6322	1445	4877	FALSE	Pain in joint	musculoskeletal
701	0.289563	0.763952	0.196408	1.3315	0.352449	7672	129	7543	FALSE	Other hypertrophic and atrophic conditions of skin	dermatologic
278.4	0.33219	0.734926	0.0838339	1.38602	0.353857	6832	112	6720	FALSE	Abnormal weight gain	endocrine/metabolic
78	0.265447	1.27011	0.749833	1.79039	0.367717	5421	170	5251	FALSE	Viral warts & HPV	infectious diseases
742	0.364893	0.720455	0.00526518	1.43565	0.368897	6997	108	6889	FALSE	Derangement of joint, non-traumatic	musculoskeletal
599.4	0.268714	1.26955	0.742875	1.79623	0.374445	6343	113	6230	FALSE	Urinary incontinence	genitourinary
278.11	0.201688	1.19175	0.796441	1.58706	0.384427	6908	188	6720	FALSE	Morbid obesity	endocrine/metabolic
250.2	0.136406	1.12472	0.857362	1.39207	0.388887	7600	458	7142	FALSE	Type 2 diabetes	endocrine/metabolic
327.3	0.159512	1.14674	0.834099	1.45939	0.39067	6966	340	6626	FALSE	Sleep apnea	neurological
626	0.156748	0.874563	0.567336	1.18179	0.392511	7031	432	6599	FALSE	Disorders of menstruation and other abnormal bleeding from female genital tract	genitourinary
764	0.213163	1.19766	0.779862	1.61546	0.397461	7246	166	7080	FALSE	Sciatica	symptoms
704	0.308989	0.771127	0.16551	1.37675	0.400271	7500	122	7378	FALSE	Diseases of hair and hair follicles	dermatologic
792.1	0.193136	1.1742	0.795651	1.55274	0.405714	7554	193	7361	FALSE	Papanicolaou smear of cervix or vagina with atypical squamous cells	genitourinary
250.1	0.236068	1.21628	0.753586	1.67897	0.406873	7270	128	7142	FALSE	Type 1 diabetes	endocrine/metabolic
586	0.209064	1.18608	0.776314	1.59584	0.414344	7202	158	7044	FALSE	Other disorders of the kidney and ureters	genitourinary
763	0.205633	1.1767	0.773658	1.57974	0.428781	7266	186	7080	FALSE	Thoracic or lumbosacral neuritis or radiculitis, unspecified	symptoms
593	0.236334	0.832672	0.369458	1.29589	0.438448	6054	174	5880	FALSE	Hematuria	genitourinary
626.12	0.298026	0.796862	0.212731	1.38099	0.446105	6732	133	6599	FALSE	Excessive or frequent menstruation	genitourinary
272.11	0.247837	0.830903	0.345143	1.31666	0.4548	7047	200	6847	FALSE	Hypercholesterolemia	endocrine/metabolic
792	0.189984	1.14289	0.770518	1.51526	0.48206	7566	205	7361	FALSE	Abnormal Papanicolaou smear of cervix and cervical HPV	genitourinary
870	0.187971	1.1392	0.770774	1.50762	0.488112	6695	180	6515	FALSE	Open wounds of head; neck; and trunk	injuries & poisonings
626.1	0.178678	0.885775	0.535567	1.23598	0.497243	6930	331	6599	FALSE	Irregular menstrual cycle/bleeding	genitourinary
427.9	0.184758	0.886596	0.52447	1.24872	0.514739	6381	307	6074	FALSE	Palpitations	circulatory system
561	0.187284	1.12514	0.758062	1.49221	0.528985	6614	204	6410	FALSE	Symptoms involving digestive system	digestive
340	0.149487	1.09784	0.804843	1.39083	0.532352	7144	375	6769	FALSE	Migraine	neurological
351	0.193361	1.12824	0.749252	1.50723	0.532622	7275	221	7054	FALSE	Other peripheral nerve disorders	neurological
809	0.161785	1.10487	0.78777	1.42197	0.537624	6373	259	6114	FALSE	Fracture of unspecified bones	injuries & poisonings
772.2	0.237191	0.864974	0.40008	1.32987	0.54083	7304	155	7149	FALSE	Spasm of muscle	symptoms
272	0.130629	0.927398	0.671366	1.18343	0.563943	7587	740	6847	FALSE	Disorders of lipoid metabolism	endocrine/metabolic
721.1	0.190971	0.899187	0.524884	1.27349	0.577911	6768	258	6510	FALSE	Spondylosis without myelopathy	musculoskeletal
721	0.186504	0.902205	0.536657	1.26775	0.581084	6777	267	6510	FALSE	Spondylosis and allied disorders	musculoskeletal
801	0.171317	1.0925	0.75672	1.42828	0.605566	6393	279	6114	FALSE	Fracture of ankle and foot	injuries & poisonings
687.1	0.160527	0.92125	0.606616	1.23588	0.609375	6647	413	6234	FALSE	Rash and other nonspecific skin eruption	dermatologic
272.1	0.13089	0.937296	0.680752	1.19384	0.620782	7582	735	6847	FALSE	Hyperlipidemia	endocrine/metabolic
250	0.129869	1.0638	0.809258	1.31834	0.633906	7643	501	7142	FALSE	Diabetes mellitus	endocrine/metabolic
747	0.263837	0.884457	0.367336	1.40158	0.641667	7870	117	7753	FALSE	Cardiac and circulatory congenital anomalies	congenital anomalies
599	0.124641	1.05842	0.814121	1.30271	0.648745	6827	597	6230	FALSE	Other symptoms/disorders or the urinary system	genitourinary
722	0.138335	1.06476	0.793627	1.3359	0.650097	6986	476	6510	FALSE	Intervertebral disc disorders	musculoskeletal
479	0.209951	0.917632	0.506128	1.32914	0.682228	5037	190	4847	FALSE	Other upper respiratory disease	respiratory
339	0.182832	1.0753	0.716953	1.43365	0.691292	6995	226	6769	FALSE	Other headache syndromes	neurological
803.2	0.191686	1.07502	0.699318	1.45072	0.705883	6367	253	6114	FALSE	Fracture of radius and ulna	injuries & poisonings
687.4	0.203244	0.930149	0.531791	1.32851	0.721635	6429	195	6234	FALSE	Disturbance of skin sensation	dermatologic
599.3	0.149514	1.05371	0.760663	1.34676	0.726399	6626	396	6230	FALSE	Dysuria	genitourinary
740.1	0.18169	0.938662	0.582549	1.29478	0.727545	7325	353	6972	FALSE	Osteoarthritis; localized	musculoskeletal
788	0.175998	0.943248	0.598292	1.2882	0.739912	7663	242	7421	FALSE	Syncope and collapse	symptoms
327.32	0.175893	1.05874	0.713987	1.40349	0.745563	6913	287	6626	FALSE	Obstructive sleep apnea	neurological
261.4	0.184535	1.05877	0.697083	1.42046	0.75696	7223	250	6973	FALSE	Vitamin D deficiency	endocrine/metabolic
558	0.21695	1.06739	0.642169	1.49261	0.763712	6573	163	6410	FALSE	Noninfectious gastroenteritis	digestive
536	0.26892	1.08317	0.556089	1.61026	0.766393	7475	100	7375	FALSE	Disorders of function of stomach	digestive
427.2	0.276195	0.923196	0.381854	1.46454	0.772323	6204	130	6074	FALSE	Atrial fibrillation and flutter	circulatory system
740	0.153637	0.959513	0.658384	1.26064	0.787924	7459	487	6972	FALSE	Osteoarthrosis	musculoskeletal
722.1	0.230775	1.0604	0.608079	1.51272	0.799404	6675	165	6510	FALSE	Displacement of intervertebral disc	musculoskeletal
747.1	0.272512	0.937776	0.403652	1.4719	0.813627	7859	106	7753	FALSE	Cardiac congenital anomalies	congenital anomalies
741	0.159914	1.03672	0.723294	1.35015	0.821563	7220	331	6889	FALSE	Symptoms and disorders of the joints	musculoskeletal
766	0.270447	1.06192	0.531844	1.59199	0.824202	7191	111	7080	FALSE	Neuralgia, neuritis, and radiculitis NOS	symptoms
368	0.263384	0.94458	0.428346	1.46081	0.82862	7595	134	7461	FALSE	Visual disturbances	sense organs
564.1	0.25326	0.95208	0.45569	1.44847	0.846256	6549	139	6410	FALSE	Irritable Bowel Syndrome	digestive
350.2	0.247764	1.04459	0.558976	1.53021	0.860229	7561	115	7446	FALSE	Abnormality of gait	neurological
592	0.244808	0.962193	0.48237	1.44202	0.874907	6014	134	5880	FALSE	Cystitis and urethritis	genitourinary
592.1	0.251444	0.964401	0.471571	1.45723	0.885376	6007	127	5880	FALSE	Cystitis	genitourinary
348	0.222158	0.969253	0.533823	1.40468	0.888206	6749	137	6612	FALSE	Other conditions of brain	neurological
805	0.168913	1.02326	0.69219	1.35433	0.891725	6340	226	6114	FALSE	Fracture of vertebral column without mention of spinal cord injury	injuries & poisonings
550	0.196536	1.02599	0.64078	1.4112	0.896132	7707	212	7495	FALSE	Abdominal hernia	digestive
804	0.229389	0.970933	0.521331	1.42054	0.897681	6314	200	6114	FALSE	Fracture of hand or wrist	injuries & poisonings
480	0.124051	0.9844	0.74126	1.22754	0.899143	5974	506	5468	FALSE	Pneumonia	respiratory
835	0.300598	0.967523	0.37835	1.5567	0.91254	7405	136	7269	FALSE	Internal derangement of knee	injuries & poisonings
532	0.188564	0.980059	0.610473	1.34965	0.914933	6401	225	6176	FALSE	Dysphagia	digestive
740.11	0.190363	0.980057	0.606944	1.35317	0.915722	7290	318	6972	FALSE	Osteoarthrosis, localized, primary	musculoskeletal
765	0.285853	0.9794	0.419129	1.53967	0.941952	7195	115	7080	FALSE	Cervical radiculitis	symptoms
427.21	0.278015	0.985886	0.440978	1.5308	0.959224	6201	127	6074	FALSE	Atrial fibrillation	circulatory system
480.1	0.228744	0.990666	0.542328	1.439	0.967299	5597	129	5468	FALSE	Bacterial pneumonia	respiratory
741.2	0.268018	0.989989	0.464673	1.5153	0.970053	7022	133	6889	FALSE	Stiffness of joint	musculoskeletal
216	484.942	8.73819e-08	0	0	0.973264	7604	115	7489	FALSE	Benign neoplasm of skin	neoplasms
761	0.127594	0.996555	0.74647	1.24664	0.97842	7305	555	6750	FALSE	Cervicalgia	symptoms
803	0.146464	1.00334	0.716274	1.29041	0.981823	6540	426	6114	FALSE	Fracture of upper limb	injuries & poisonings

## Sheet: Supplementary table 3
Supplementary table 3: PheWAS of buprenorphine duration (less than 6 months vs. greater or equal to 6 months) adjusting for pain-related phenotypes
phenotype	Standard error	Odds Ratio	lower 95% CI	upper 95% CI	p-value	n_total	n_cases	n_controls	bonferroni	description	group
316	0.13558	22.4036	22.1378	22.6693	2.18837e-116	7046	2913	4133	TRUE	Substance addiction and disorders	mental disorders
318	0.141979	24.0563	23.778	24.3346	3.90013e-111	5716	1583	4133	TRUE	Tobacco use disorder	mental disorders
296.1	0.113523	9.73426	9.51175	9.95676	2.19704e-89	4731	1132	3599	TRUE	Bipolar	mental disorders
296	0.100421	6.94988	6.75305	7.1467	4.77687e-83	6230	2631	3599	TRUE	Mood disorders	mental disorders
300.9	0.121144	10.1415	9.90409	10.379	1.62672e-81	4550	951	3599	TRUE	Posttraumatic stress disorder	mental disorders
300	0.102896	6.71497	6.51329	6.91665	1.80174e-76	5769	2170	3599	TRUE	Anxiety disorders	mental disorders
317	0.156774	17.5705	17.2633	17.8778	1.14054e-74	5021	888	4133	TRUE	Alcohol-related disorders	mental disorders
296.2	0.106228	6.60866	6.40046	6.81687	1.07007e-70	5411	1812	3599	TRUE	Depression	mental disorders
296.22	0.111136	7.10715	6.88932	7.32498	1.09418e-69	4863	1264	3599	TRUE	Major depressive disorder	mental disorders
306.1	0.187247	23.1809	22.8139	23.5479	3.03462e-63	3912	313	3599	TRUE	Mental disorders durring/after pregnancy	mental disorders
297.1	0.125172	8.12477	7.87943	8.3701	7.12235e-63	4353	754	3599	TRUE	Suicidal ideation	mental disorders
300.1	0.109798	6.24225	6.02704	6.45745	1.85751e-62	5083	1484	3599	TRUE	Anxiety disorder	mental disorders
297	0.123283	7.70746	7.46582	7.94909	1.24739e-61	4414	815	3599	TRUE	Suicidal ideation or attempt	mental disorders
317.1	0.172334	17.1022	16.7644	17.44	5.54457e-61	4693	560	4133	TRUE	Alcoholism	mental disorders
70.3	0.0942601	4.24977	4.06502	4.43452	3.55819e-53	5899	648	5251	TRUE	Viral hepatitis C	infectious diseases
70	0.0927456	4.13405	3.95227	4.31583	7.33678e-53	5927	676	5251	TRUE	Viral hepatitis	infectious diseases
465	0.120473	0.169654	-0.0664731	0.40578	4.43554e-49	6243	2945	3298	TRUE	Acute upper respiratory infections of multiple or unspecified sites	respiratory
649	0.125741	5.82767	5.58122	6.07412	1.21274e-44	7578	383	7195	TRUE	Other conditions or status of the mother complicating pregnancy, childbirth, or the puerperium	pregnancy complications
301	0.176949	11.6485	11.3017	11.9953	8.96722e-44	3840	241	3599	TRUE	Personality disorders	mental disorders
301.2	0.204916	12.9955	12.5938	13.3971	6.15309e-36	3761	162	3599	TRUE	Antisocial/borderline personality disorder	mental disorders
655	0.115243	4.06945	3.84357	4.29533	4.04031e-34	7615	465	7150	TRUE	Known or suspected fetal abnormality affecting management of mother	pregnancy complications
465.2	0.149139	0.166153	-0.126158	0.458465	2.3335e-33	5107	1809	3298	TRUE	Acute pharyngitis	respiratory
295	0.172584	7.94583	7.60757	8.2841	3.16808e-33	3835	236	3599	TRUE	Schizophrenia and other psychotic disorders	mental disorders
647	0.203403	10.4334	10.0347	10.8321	9.43299e-31	7603	147	7456	TRUE	Infectious and parasitic complications affecting pregnancy	pregnancy complications
300.11	0.168177	6.55848	6.22885	6.8881	4.92708e-29	3912	313	3599	TRUE	Generalized anxiety disorder	mental disorders
304	0.17115	6.52697	6.19151	6.86242	5.89681e-28	3891	292	3599	TRUE	Adjustment reaction	mental disorders
655.1	0.162815	5.70255	5.38343	6.02167	1.10268e-26	7355	205	7150	TRUE	Abnormality in fetal heart rate or rhythm	pregnancy complications
464	0.214925	0.105167	-0.316087	0.526421	1.07864e-25	4146	848	3298	TRUE	Acute sinusitis	respiratory
646	0.180273	6.34012	5.98678	6.69345	1.24605e-24	7641	171	7470	TRUE	Other complications of pregnancy NEC	pregnancy complications
338.2	0.100408	2.43818	2.24138	2.63498	6.91259e-19	6920	742	6178	TRUE	Chronic pain	neurological
338	0.0881062	2.0679	1.89521	2.24059	1.63626e-16	7245	1067	6178	TRUE	Pain	neurological
636	0.139472	2.86768	2.59431	3.14104	4.2368e-14	7465	293	7172	TRUE	Early or threatened labor; hemorrhage in early pregnancy	pregnancy complications
300.12	0.198873	4.44859	4.0588	4.83838	6.13262e-14	3808	209	3599	TRUE	Agorophobia, social phobia, and panic disorder	mental disorders
476	0.198051	0.232085	-0.156094	0.620264	1.64162e-13	5723	876	4847	TRUE	Allergic rhinitis	respiratory
291	0.143013	2.83337	2.55306	3.11367	3.2814e-13	6829	262	6567	TRUE	Other specified nonpsychotic and/or transient mental disorders	mental disorders
41	0.109119	2.12413	1.91025	2.338	5.05473e-12	7456	483	6973	TRUE	Bacterial infection NOS	infectious diseases
300.4	0.227364	4.6241	4.17847	5.06973	1.63993e-11	3762	163	3599	TRUE	Dysthymic disorder	mental disorders
785	0.0795865	1.70256	1.54657	1.85855	2.28995e-11	6358	1648	4710	TRUE	Abdominal pain	symptoms
681.3	0.149981	2.7213	2.42733	3.01526	2.47366e-11	6304	235	6069	TRUE	Cellulitis and abscess of arm/hand	dermatologic
381	0.277785	0.164254	-0.380204	0.708713	7.89155e-11	6740	699	6041	TRUE	Otitis media and Eustachian tube disorders	sense organs
306	0.217905	3.80053	3.37343	4.22762	8.94636e-10	3766	167	3599	TRUE	Other mental disorder	mental disorders
782.3	0.136096	2.28897	2.02222	2.55572	1.16707e-09	7447	327	7120	TRUE	Edema	symptoms
642	0.18957	3.15942	2.78786	3.53097	1.29177e-09	7867	140	7727	TRUE	Hypertension complicating pregnancy, childbirth, and the puerperium	pregnancy complications
771.1	0.12472	2.13154	1.88709	2.37599	1.29236e-09	7508	364	7144	TRUE	Swelling of limb	symptoms
338.1	0.109516	1.9112	1.69655	2.12585	3.32913e-09	6789	611	6178	TRUE	Acute pain	neurological
681	0.0992129	1.78719	1.59273	1.98165	4.84213e-09	6766	697	6069	TRUE	Superficial cellulitis and abscess	dermatologic
295.3	0.240598	4.08031	3.60874	4.55188	5.08126e-09	3717	118	3599	TRUE	Psychosis	mental disorders
276	0.0918603	1.70953	1.52948	1.88958	5.30443e-09	7027	862	6165	TRUE	Disorders of fluid, electrolyte, and acid-base balance	endocrine/metabolic
960	0.182776	2.90539	2.54715	3.26363	5.36698e-09	6444	144	6300	TRUE	Poisoning by antibiotics	injuries & poisonings
798	0.0870855	1.64705	1.47636	1.81773	1.00542e-08	6592	1331	5261	TRUE	Malaise and fatigue	symptoms
681.5	0.155366	2.42405	2.11954	2.72857	1.20457e-08	6293	224	6069	TRUE	Cellulitis and abscess of leg, except foot	dermatologic
303	0.269375	4.63776	4.10978	5.16573	1.22994e-08	3702	103	3599	TRUE	Psychogenic and somatoform disorders	mental disorders
653	0.205826	3.06548	2.66206	3.4689	5.254e-08	7647	113	7534	TRUE	Problems associated with amniotic cavity and membranes	pregnancy complications
710	0.184557	2.65519	2.29346	3.01692	1.21566e-07	7280	146	7134	TRUE	Osteomyelitis, periostitis, and other infections involving bone	musculoskeletal
345	0.119085	1.87735	1.64394	2.11075	1.22881e-07	7028	416	6612	TRUE	Epilepsy, recurrent seizures, convulsions	neurological
276.1	0.109063	1.76069	1.54693	1.97446	2.13748e-07	6735	570	6165	TRUE	Electrolyte imbalance	endocrine/metabolic
41.1	0.139162	2.03313	1.76037	2.30589	3.41606e-07	7252	279	6973	TRUE	Staphylococcus infections	infectious diseases
789	0.0955164	1.62673	1.43952	1.81394	3.50367e-07	6638	847	5791	TRUE	Nausea and vomiting	symptoms
54	0.221216	3.07845	2.64486	3.51203	3.7164e-07	5361	110	5251	TRUE	Herpes simplex	infectious diseases
297.2	0.25371	3.59826	3.10099	4.09553	4.49035e-07	3721	122	3599	TRUE	Suicide or self-inflicted injury	mental disorders
285	0.104697	1.69584	1.49063	1.90105	4.5396e-07	7175	651	6524	TRUE	Other anemias	hematopoietic
381.1	0.366081	0.165146	-0.552373	0.882665	8.6779e-07	6566	525	6041	TRUE	Otitis media	sense organs
276.5	0.118049	1.78412	1.55275	2.0155	9.38368e-07	6634	469	6165	TRUE	Hypovolemia	endocrine/metabolic
508	0.128149	1.86533	1.61416	2.11651	1.14481e-06	7140	376	6764	TRUE	Pulmonary collapse; interstitial and compensatory emphysema	respiratory
292.4	0.12438	1.82502	1.58123	2.06881	1.32007e-06	6969	402	6567	TRUE	Altered mental status	mental disorders
276.14	0.129678	1.85618	1.60201	2.11034	1.84544e-06	6533	368	6165	TRUE	Hypopotassemia	endocrine/metabolic
345.3	0.132045	1.84413	1.58532	2.10294	3.57211e-06	6951	339	6612	TRUE	Convulsions	neurological
401.1	0.0899197	1.51629	1.34005	1.69254	3.66842e-06	7449	1417	6032	TRUE	Essential hypertension	circulatory system
38	0.126435	1.79159	1.54378	2.0394	3.99009e-06	7336	363	6973	TRUE	Septicemia	infectious diseases
994	0.13322	1.83513	1.57402	2.09624	5.1832e-06	7867	304	7563	TRUE	Sepsis and SIRS	injuries & poisonings
292	0.110892	1.65347	1.43613	1.87082	5.76444e-06	7112	545	6567	TRUE	Neurological disorders	mental disorders
401	0.0895364	1.49773	1.32224	1.67322	6.43459e-06	7461	1429	6032	TRUE	Hypertension	circulatory system
41.11	0.193733	2.37754	1.99782	2.75725	7.80735e-06	7110	137	6973	TRUE	Methicillin sensitive Staphylococcus aureus	infectious diseases
381.2	0.509877	0.102666	-0.896693	1.10202	8.03045e-06	6298	257	6041	TRUE	Eustachian tube disorders	sense organs
512.8	0.117854	0.591729	0.360735	0.822723	8.50067e-06	5386	1227	4159	TRUE	Cough	respiratory
381.11	0.391521	0.175666	-0.591716	0.943048	8.90913e-06	6521	480	6041	TRUE	Suppurative and unspecified otitis media	sense organs
496	0.157169	1.96545	1.6574	2.2735	1.71319e-05	6594	251	6343	TRUE	Chronic airway obstruction	respiratory
291.8	0.17299	2.08862	1.74956	2.42768	2.06746e-05	6754	187	6567	TRUE	Alteration of consciousness	mental disorders
41.12	0.18064	2.13023	1.77617	2.48428	2.83441e-05	7127	154	6973	TRUE	Methicillin resistant Staphylococcus aureus	infectious diseases
760	0.090811	1.45259	1.2746	1.63058	3.93482e-05	6555	1375	5180	FALSE	Back pain	symptoms
994.2	0.139314	1.76544	1.49239	2.0385	4.50347e-05	7842	279	7563	FALSE	Sepsis	injuries & poisonings
483	0.205373	0.432705	0.0301741	0.835236	4.52467e-05	5968	500	5468	FALSE	Acute bronchitis and bronchiolitis	respiratory
427.7	0.125155	1.65972	1.41441	1.90502	5.16237e-05	6473	399	6074	FALSE	Tachycardia NOS	circulatory system
729	0.143412	1.75405	1.47296	2.03513	8.91964e-05	6601	267	6334	FALSE	Other disorders of soft tissues	musculoskeletal
355.1	0.176848	1.99841	1.65179	2.34503	9.04185e-05	7246	192	7054	FALSE	Chronic pain syndrome	neurological
710.1	0.203952	2.21953	1.81979	2.61928	9.25858e-05	7256	122	7134	FALSE	Osteomyelitis	musculoskeletal
509	0.12606	1.63658	1.38951	1.88366	9.31553e-05	7157	393	6764	FALSE	Respiratory failure, insufficiency, arrest	respiratory
686	0.188027	2.08226	1.71373	2.4508	9.58787e-05	6226	157	6069	FALSE	Other local infections of skin and subcutaneous tissue	dermatologic
571	0.154966	1.81691	1.51317	2.12064	0.000116518	7336	246	7090	FALSE	Chronic liver disease and cirrhosis	digestive
574.1	0.238411	2.47439	2.0071	2.94167	0.000144624	7692	102	7590	FALSE	Cholelithiasis	digestive
285.1	0.160025	1.82076	1.50711	2.13441	0.000180571	6747	223	6524	FALSE	Acute posthemorrhagic anemia	hematopoietic
579	0.165281	1.82696	1.50301	2.15092	0.000266103	6993	203	6790	FALSE	Other symptoms involving abdomen and pelvis	digestive
571.5	0.161368	1.78909	1.47281	2.10537	0.000312314	7319	229	7090	FALSE	Other chronic nonalcoholic liver disease	digestive
574	0.213489	2.15114	1.7327	2.56958	0.000333228	7720	130	7590	FALSE	Cholelithiasis and cholecystitis	digestive
585	0.129681	1.58791	1.33374	1.84209	0.0003627	7420	376	7044	FALSE	Renal failure	genitourinary
980	0.186175	1.93842	1.57351	2.30332	0.000377842	7825	146	7679	FALSE	Encounter for long-term (current) use of antibiotics	infectious diseases
428.1	0.200051	2.03635	1.64425	2.42845	0.000378157	7615	144	7471	FALSE	Congestive heart failure (CHF) NOS	circulatory system
481	0.371051	0.269112	-0.458148	0.996371	0.000403783	5669	201	5468	FALSE	Influenza	respiratory
38.3	0.173077	1.83722	1.49798	2.17645	0.000440846	7159	186	6973	FALSE	Bacteremia	infectious diseases
977	0.205361	2.03963	1.63712	2.44214	0.000518897	6428	128	6300	FALSE	Personal history of allergy to medicinal agents	injuries & poisonings
420	0.206494	2.03737	1.63264	2.4421	0.000568115	7783	121	7662	FALSE	Carditis	circulatory system
509.3	0.229414	2.19484	1.74519	2.64449	0.000611181	6868	104	6764	FALSE	Pulmonary insufficiency or respiratory failure following trauma and surgery	respiratory
312	0.21341	2.07265	1.65437	2.49094	0.000637442	7030	124	6906	FALSE	Conduct disorders	mental disorders
979	0.179057	1.83408	1.48313	2.18503	0.000705533	6482	182	6300	FALSE	Adverse drug events and drug allergies	injuries & poisonings
585.1	0.137209	1.59038	1.32145	1.85931	0.000720961	7367	323	7044	FALSE	Acute renal failure	genitourinary
427.5	0.172146	1.77848	1.44107	2.11589	0.000824029	6272	198	6074	FALSE	Arrhythmia (cardiac) NOS	circulatory system
428	0.175001	1.79531	1.4523	2.13831	0.0008263	7671	200	7471	FALSE	Congestive heart failure; nonhypertensive	circulatory system
619	0.179432	1.82008	1.4684	2.17177	0.00084487	7563	184	7379	FALSE	Noninflammatory female genital disorders	genitourinary
288	0.148544	1.62825	1.3371	1.91939	0.00103118	6984	265	6719	FALSE	Diseases of white blood cells	hematopoietic
474	0.270659	0.413359	-0.117133	0.943851	0.0010984	5213	366	4847	FALSE	Acute and chronic tonsillitis	respiratory
800.3	0.224398	2.07166	1.63184	2.51148	0.00117118	6225	111	6114	FALSE	Fracture of tibia and fibula	injuries & poisonings
250.4	0.214714	2.00566	1.58482	2.4265	0.0011894	7259	117	7142	FALSE	Abnormal glucose	endocrine/metabolic
571.51	0.223974	2.06318	1.62419	2.50216	0.00122232	7199	109	7090	FALSE	Cirrhosis of liver without mention of alcohol	digestive
382	0.398191	0.276386	-0.504069	1.05684	0.00124009	6208	167	6041	FALSE	Otalgia	sense organs
427	0.0937723	1.35309	1.1693	1.53688	0.0012609	6997	923	6074	FALSE	Cardiac dysrhythmias	circulatory system
276.13	0.223628	2.04681	1.6085	2.48512	0.00135997	6283	118	6165	FALSE	Hyperpotassemia	endocrine/metabolic
819	0.174756	1.74954	1.40702	2.09206	0.00137057	7473	184	7289	FALSE	Skull and face fracture and other intercranial injury	injuries & poisonings
521.1	0.202057	1.90868	1.51264	2.30471	0.00137837	7189	134	7055	FALSE	Dental caries	digestive
288.2	0.156432	1.64403	1.33742	1.95063	0.00148261	6953	234	6719	FALSE	Elevated white blood cell count	hematopoietic
369	0.395801	0.285378	-0.490392	1.06115	0.00153436	6842	211	6631	FALSE	Infection of the eye	sense organs
418	0.091441	1.33449	1.15527	1.51372	0.00160173	6790	1142	5648	FALSE	Nonspecific chest pain	circulatory system
509.1	0.146047	1.58518	1.29893	1.87143	0.00160793	7049	285	6764	FALSE	Respiratory failure	respiratory
521	0.201431	1.87236	1.47756	2.26717	0.0018474	7191	136	7055	FALSE	Diseases of hard tissues of teeth	digestive
418.1	0.214842	1.94714	1.52605	2.36823	0.00192456	5773	125	5648	FALSE	Precordial pain	circulatory system
313.1	0.162735	1.63694	1.31797	1.9559	0.00245862	7222	316	6906	FALSE	Attention deficit hyperactivity disorder	mental disorders
510	0.184206	1.73994	1.37889	2.10098	0.00264117	7670	164	7506	FALSE	Other diseases of lung	respiratory
375.1	0.37499	0.324848	-0.410132	1.05983	0.00271331	7435	191	7244	FALSE	Dry eyes	sense organs
470	0.336683	0.3661	-0.2938	1.026	0.00283992	5023	176	4847	FALSE	Septal Deviations/Turbinate Hypertrophy	respiratory
371	0.352891	0.349756	-0.34191	1.04142	0.00291183	6802	171	6631	FALSE	Inflammation of the eye	sense organs
276.12	0.185143	1.73028	1.36741	2.09316	0.0030622	6346	181	6165	FALSE	Hyposmolality and/or hyponatremia	endocrine/metabolic
389	0.277364	0.442898	-0.100735	0.986532	0.00332188	7602	214	7388	FALSE	Hearing loss	sense organs
512.7	0.104486	1.35612	1.15133	1.56092	0.00355115	4916	757	4159	FALSE	Shortness of breath	respiratory
369.5	0.42727	0.292364	-0.545086	1.12981	0.00399991	6824	193	6631	FALSE	Conjunctivitis, infectious	sense organs
512.9	0.118916	1.4062	1.17312	1.63927	0.0041487	4684	525	4159	FALSE	Other dyspnea	respiratory
426	0.198165	1.75411	1.36571	2.14252	0.00457073	6224	150	6074	FALSE	Cardiac conduction disorders	circulatory system
507	0.161679	1.57898	1.26209	1.89587	0.00472446	6999	235	6764	FALSE	Pleurisy; pleural effusion	respiratory
345.1	0.232324	1.90894	1.45359	2.3643	0.00538647	6718	106	6612	FALSE	Epilepsy	neurological
625	0.173019	1.612	1.27288	1.95111	0.00578612	7409	219	7190	FALSE	Pain and other symptoms associated with female genital organs	genitourinary
452	0.174088	1.61591	1.2747	1.95712	0.00583979	7245	182	7063	FALSE	Other venous embolism and thrombosis	circulatory system
313	0.15765	1.53797	1.22897	1.84696	0.00632405	7255	349	6906	FALSE	Pervasive developmental disorders	mental disorders
594.1	0.179336	1.62951	1.27801	1.981	0.00647521	7672	178	7494	FALSE	Calculus of kidney	genitourinary
530.1	0.104625	1.32887	1.12381	1.53394	0.00657515	7004	828	6176	FALSE	Esophagitis, GERD and related diseases	digestive
474.1	0.520602	0.244143	-0.776238	1.26452	0.00676084	4993	146	4847	FALSE	Acute tonsillitis	respiratory
506	0.225948	1.83992	1.39706	2.28278	0.00696513	6872	108	6764	FALSE	Empyema and pneumothorax	respiratory
475	0.252953	0.510073	0.0142858	1.00586	0.00778221	5051	204	4847	FALSE	Chronic sinusitis	respiratory
916	0.203991	1.71909	1.31927	2.11891	0.00790806	6908	155	6753	FALSE	Contusion	injuries & poisonings
681.7	0.205402	1.72144	1.31885	2.12403	0.00818405	6201	132	6069	FALSE	Cellulitis and abscess of trunk	dermatologic
112	0.178682	1.60242	1.2522	1.95264	0.00831874	7072	201	6871	FALSE	Candidiasis	infectious diseases
530	0.102814	1.3095	1.10798	1.51101	0.00872476	7035	859	6176	FALSE	Diseases of esophagus	digestive
594	0.171855	1.56907	1.23224	1.90591	0.00875901	7689	195	7494	FALSE	Urinary calculus	genitourinary
327	0.132746	1.41618	1.156	1.67636	0.00876037	7091	465	6626	FALSE	Sleep disorders	neurological
939	0.248857	0.521279	0.0335187	1.00904	0.00884881	6685	269	6416	FALSE	Atopic/contact dermatitis due to other or unspecified	dermatologic
395	0.198278	1.67839	1.28976	2.06701	0.00901078	7485	146	7339	FALSE	Heart valve disorders	circulatory system
530.11	0.107355	1.32053	1.11011	1.53094	0.00960209	6967	791	6176	FALSE	GERD	digestive
706	0.243868	0.538321	0.0603399	1.0163	0.0111015	7463	315	7148	FALSE	Diseases of sebaceous glands	dermatologic
411	0.159204	1.49455	1.18251	1.80659	0.011604	7622	328	7294	FALSE	Ischemic Heart Disease	circulatory system
371.2	0.596391	0.222523	-0.946403	1.39145	0.0117456	6732	101	6631	FALSE	Conjunctivitis, noninfectious	sense organs
478	0.524153	0.273766	-0.753573	1.30111	0.013452	4949	102	4847	FALSE	Throat pain	respiratory
614	0.157701	1.47429	1.1652	1.78339	0.0138368	7402	297	7105	FALSE	Inflammatory diseases of female pelvic organs	genitourinary
416	0.206713	1.66276	1.2576	2.06792	0.0138999	7632	137	7495	FALSE	Cardiomegaly	circulatory system
276.41	0.177419	1.53386	1.18612	1.8816	0.015902	6367	202	6165	FALSE	Acidosis	endocrine/metabolic
367.1	0.375734	0.404995	-0.331443	1.14143	0.0161439	7689	166	7523	FALSE	Myopia	sense organs
401.2	0.258592	1.86094	1.3541	2.36778	0.0163157	6163	131	6032	FALSE	Hypertensive heart and/or renal disease	circulatory system
411.2	0.223706	1.68296	1.2445	2.12142	0.0199676	7420	126	7294	FALSE	Myocardial infarction	circulatory system
770	0.143284	1.39468	1.11385	1.67552	0.0202474	7428	391	7037	FALSE	Myalgia and myositis unspecified	symptoms
627.2	0.476145	0.331088	-0.602156	1.26433	0.0202596	6721	122	6599	FALSE	Symptomatic menopause	genitourinary
260	0.16808	1.45646	1.12702	1.78589	0.0252824	7185	212	6973	FALSE	Protein-calorie malnutrition	endocrine/metabolic
276.4	0.173809	1.47436	1.13369	1.81502	0.0255088	6381	216	6165	FALSE	Acid-base balance disorder	endocrine/metabolic
110	0.375345	0.436237	-0.29944	1.17191	0.0270945	7005	134	6871	FALSE	Dermatophytosis / Dermatomycosis	infectious diseases
627	0.349769	0.46317	-0.222377	1.14872	0.0277724	6768	169	6599	FALSE	Menopausal and postmenopausal disorders	genitourinary
514	0.204312	1.56481	1.16436	1.96526	0.0284106	7734	132	7602	FALSE	Abnormal findings examination of lungs	respiratory
110.1	0.400027	0.416748	-0.367304	1.2008	0.0286669	6992	121	6871	FALSE	Dermatophytosis	infectious diseases
591	0.105985	1.25901	1.05128	1.46674	0.0297674	6721	841	5880	FALSE	Urinary tract infection	genitourinary
720.1	0.27612	1.81826	1.27706	2.35945	0.0303661	6610	100	6510	FALSE	Spinal stenosis of lumbar region	musculoskeletal
458.9	0.173107	1.45409	1.1148	1.79338	0.0305643	7543	202	7341	FALSE	Hypotension NOS	circulatory system
260.2	0.228693	1.6344	1.18617	2.08264	0.0316979	7080	107	6973	FALSE	severe protein-calorie malnutrition	endocrine/metabolic
286.2	0.204668	1.54476	1.14362	1.94591	0.0336059	7415	146	7269	FALSE	Encounter for long-term (current) use of anticoagulants	hematopoietic
807	0.218062	1.57769	1.15029	2.00509	0.0365303	6229	115	6114	FALSE	Fracture of ribs	injuries & poisonings
577	0.228368	1.60625	1.15865	2.05385	0.0379698	7868	105	7763	FALSE	Diseases of pancreas	digestive
415	0.209965	1.53881	1.12727	1.95034	0.0400966	7621	126	7495	FALSE	Pulmonary heart disease	circulatory system
619.4	0.234018	1.61461	1.15594	2.07329	0.0406328	7487	108	7379	FALSE	Noninflammatory disorders of vagina	genitourinary
555	0.232677	1.60986	1.15381	2.06591	0.0407193	6517	107	6410	FALSE	Inflammatory bowel disease and other gastroenteritis and colitis	digestive
714.1	0.253708	1.67379	1.17652	2.17106	0.0423316	7398	103	7295	FALSE	Rheumatoid arthritis	musculoskeletal
585.3	0.234761	1.61035	1.15022	2.07048	0.0424049	7162	118	7044	FALSE	Chronic renal failure [CKD]	genitourinary
380.4	0.401846	0.442689	-0.344929	1.23031	0.0425744	7321	120	7201	FALSE	Impacted cerumen	sense organs
702	0.600731	0.300655	-0.876778	1.47809	0.045441	7456	103	7353	FALSE	Degenerative skin conditions and other dermatoses	dermatologic
327.4	0.159556	1.37414	1.06141	1.68687	0.0463778	6948	322	6626	FALSE	Insomnia	neurological
433	0.196791	1.47333	1.08762	1.85904	0.0489263	7736	172	7564	FALSE	Cerebrovascular disease	circulatory system
287	0.190293	1.45107	1.0781	1.82405	0.0504088	7424	155	7269	FALSE	Purpura and other hemorrhagic conditions	hematopoietic
840	0.173202	0.714303	0.374827	1.05378	0.0520754	6567	452	6115	FALSE	Sprains and strains	injuries & poisonings
714	0.225169	1.54002	1.09869	1.98136	0.0551537	7429	134	7295	FALSE	Rheumatoid arthritis and other inflammatory polyarthropathies	musculoskeletal
599.5	0.359507	0.502885	-0.20175	1.20752	0.0558706	6376	146	6230	FALSE	Frequency of urination and polyuria	genitourinary
286	0.211349	1.49795	1.08371	1.9122	0.0558764	7397	128	7269	FALSE	Coagulation defects	hematopoietic
173	0.473017	0.410503	-0.51661	1.33762	0.0597921	7695	107	7588	FALSE	Neoplasm of uncertain behavior of skin	neoplasms
706.1	0.314265	0.554186	-0.0617736	1.17015	0.0603534	7380	232	7148	FALSE	Acne	dermatologic
743.1	0.264631	1.63246	1.11379	2.15114	0.0640299	7574	108	7466	FALSE	Osteoporosis	musculoskeletal
512	0.0843916	0.856061	0.690654	1.02147	0.0655375	6043	1884	4159	FALSE	Other symptoms of respiratory system	respiratory
737.3	0.255381	1.59628	1.09573	2.09683	0.0670589	7247	108	7139	FALSE	Kyphoscoliosis and scoliosis	musculoskeletal
614.52	0.198243	1.43073	1.04217	1.81928	0.0707961	7306	201	7105	FALSE	Vaginitis and vulvovaginitis	genitourinary
727	0.223432	0.667869	0.229942	1.1058	0.0708166	6559	225	6334	FALSE	Other disorders of synovium, tendon, and bursa	musculoskeletal
474.2	0.306117	0.575409	-0.0245802	1.1754	0.0710063	5093	246	4847	FALSE	Chronic tonsillitis and adenoiditis	respiratory
801.1	0.216221	1.4747	1.0509	1.89849	0.072407	6247	133	6114	FALSE	Fracture of foot	injuries & poisonings
737	0.238196	1.53342	1.06656	2.00029	0.0726927	7263	124	7139	FALSE	Curvature of spine	musculoskeletal
452.2	0.227924	1.49565	1.04891	1.94238	0.0773631	7169	106	7063	FALSE	Deep vein thrombosis [DVT]	circulatory system
458	0.163531	1.33428	1.01376	1.65481	0.0778082	7580	239	7341	FALSE	Hypotension	circulatory system
578.2	0.216292	1.46197	1.03804	1.88591	0.0791062	6934	144	6790	FALSE	Blood in stool	digestive
366	0.289295	0.610244	0.0432258	1.17726	0.0877767	7863	213	7650	FALSE	Cataract	sense organs
614.5	0.178902	1.35469	1.00404	1.70534	0.089721	7350	245	7105	FALSE	Inflammatory disease of cervix, vagina, and vulva	genitourinary
495.2	0.297287	0.607108	0.0244263	1.18979	0.0932149	6482	139	6343	FALSE	Asthma with exacerbation	respiratory
380.1	0.40777	0.504347	-0.294881	1.30358	0.093226	7320	119	7201	FALSE	Otitis externa	sense organs
783	0.102376	1.18376	0.983107	1.38442	0.0993866	6853	930	5923	FALSE	Fever of unknown origin	symptoms
800	0.151868	1.28405	0.986383	1.58171	0.0997094	6415	301	6114	FALSE	Fracture of lower limb	injuries & poisonings
287.3	0.197833	1.38313	0.995379	1.77088	0.101106	7414	145	7269	FALSE	Thrombocytopenia	hematopoietic
626.13	0.371244	0.548154	-0.179485	1.27579	0.105357	6716	117	6599	FALSE	Irregular menstrual cycle	genitourinary
578.8	0.253857	1.5051	1.00754	2.00266	0.107269	6904	114	6790	FALSE	Hemorrhage of rectum and anus	digestive
244.4	0.146676	1.25932	0.971836	1.54681	0.115953	7506	386	7120	FALSE	Hypothyroidism NOS	endocrine/metabolic
564	0.211434	0.717855	0.303444	1.13227	0.116928	6620	210	6410	FALSE	Functional digestive disorders	digestive
560	0.24395	1.46163	0.983484	1.93977	0.119744	6513	103	6410	FALSE	Intestinal obstruction without mention of hernia	digestive
411.4	0.187503	1.33738	0.969873	1.70489	0.121037	7556	262	7294	FALSE	Coronary atherosclerosis	circulatory system
427.3	0.211159	1.38318	0.969312	1.79705	0.124483	6221	147	6074	FALSE	Other specified cardiac dysrhythmias	circulatory system
495	0.123269	1.20808	0.96647	1.44968	0.125158	6890	547	6343	FALSE	Asthma	respiratory
244	0.144271	1.24667	0.963901	1.52944	0.126457	7524	404	7120	FALSE	Hypothyroidism	endocrine/metabolic
278	0.129848	1.21767	0.963165	1.47217	0.129349	7211	491	6720	FALSE	Overweight, obesity and other hyperalimentation	endocrine/metabolic
578	0.155089	1.25735	0.953379	1.56133	0.139775	7096	306	6790	FALSE	Gastrointestinal hemorrhage	digestive
289.4	0.244527	1.42367	0.944399	1.90295	0.148575	6872	153	6719	FALSE	Lymphadenitis	hematopoietic
278.1	0.139518	1.22151	0.948056	1.49497	0.151531	7133	413	6720	FALSE	Obesity	endocrine/metabolic
720	0.227146	1.38357	0.938366	1.82878	0.152907	6674	164	6510	FALSE	Spinal stenosis	musculoskeletal
743	0.19721	1.32514	0.938612	1.71168	0.153431	7677	211	7466	FALSE	Osteoporosis, osteopenia and pathological fracture	musculoskeletal
726.1	0.263031	0.688755	0.173214	1.2043	0.156312	6531	197	6334	FALSE	Enthesopathy	musculoskeletal
611	0.348487	0.611609	-0.0714261	1.29464	0.15829	7566	133	7433	FALSE	Abnormal findings on mammogram or breast exam	genitourinary
79	0.202087	1.3269	0.930813	1.72299	0.161623	5623	372	5251	FALSE	Viral infection	infectious diseases
740.9	0.210356	1.3414	0.929099	1.7537	0.162637	7171	199	6972	FALSE	Osteoarthrosis NOS	musculoskeletal
599.2	0.242946	1.40208	0.925904	1.87825	0.164204	6331	101	6230	FALSE	Retention of urine	genitourinary
772.3	0.256403	0.701832	0.199282	1.20438	0.167318	7304	155	7149	FALSE	Muscle weakness	symptoms
275	0.24426	1.39891	0.920159	1.87766	0.169341	7810	101	7709	FALSE	Disorders of mineral metabolism	endocrine/metabolic
367	0.248591	0.714612	0.227374	1.20185	0.176478	7742	219	7523	FALSE	Disorders of refraction and accommodation; blindness and low vision	sense organs
512.1	0.259064	0.710563	0.202798	1.21833	0.187179	4338	179	4159	FALSE	Wheezing	respiratory
741.4	0.244296	1.37824	0.899418	1.85706	0.18912	7000	111	6889	FALSE	Joint effusions	musculoskeletal
280.1	0.19678	1.2944	0.908713	1.68009	0.189738	6707	183	6524	FALSE	Iron deficiency anemias, unspecified or not due to blood loss	hematopoietic
280	0.187313	1.27674	0.909605	1.64387	0.192137	6727	203	6524	FALSE	Iron deficiency anemias	hematopoietic
315	0.257542	1.39862	0.893841	1.90341	0.192692	7009	103	6906	FALSE	Develomental delays and disorders	mental disorders
569	0.220784	1.33068	0.89794	1.76341	0.195677	7541	134	7407	FALSE	Other disorders of intestine	digestive
366.2	0.290947	0.692444	0.122187	1.2627	0.206512	7835	185	7650	FALSE	Senile cataract	sense organs
722.6	0.168238	1.23201	0.902259	1.56175	0.214914	6832	322	6510	FALSE	Degeneration of intervertebral disc	musculoskeletal
695	0.235959	1.33592	0.873444	1.7984	0.219662	7345	131	7214	FALSE	Erythematous conditions	dermatologic
386.9	0.188239	0.798056	0.429107	1.167	0.23078	7394	296	7098	FALSE	Dizziness and giddiness (Light-headedness and vertigo)	sense organs
830	0.191788	1.25584	0.879934	1.63174	0.234917	7513	244	7269	FALSE	Dislocation	injuries & poisonings
871	0.174035	1.2221	0.880995	1.56321	0.24912	6733	218	6515	FALSE	Open wounds of extremities	injuries & poisonings
512.2	0.22686	1.28498	0.840332	1.72962	0.269043	4287	128	4159	FALSE	Painful respiration	respiratory
727.1	0.297961	0.720936	0.136932	1.30494	0.27214	6455	121	6334	FALSE	Synovitis and tenosynovitis	musculoskeletal
497	0.300595	0.722419	0.133254	1.31158	0.27939	6473	130	6343	FALSE	Bronchitis	respiratory
261	0.162041	1.18782	0.870219	1.50542	0.288147	7286	313	6973	FALSE	Vitamin deficiency	endocrine/metabolic
969	0.247782	1.29864	0.812987	1.78429	0.291598	6401	101	6300	FALSE	Poisoning by psychotropic agents	injuries & poisonings
726	0.174683	0.833314	0.490936	1.17569	0.296547	6752	418	6334	FALSE	Peripheral enthesopathies and allied syndromes	musculoskeletal
628	0.231935	1.27309	0.818497	1.72768	0.297872	6717	118	6599	FALSE	Ovarian cyst	genitourinary
272.13	0.205577	0.811056	0.408126	1.21399	0.308353	7163	316	6847	FALSE	Mixed hyperlipidemia	endocrine/metabolic
841	0.237136	1.26772	0.802933	1.7325	0.31714	6242	127	6115	FALSE	Sprains and strains of back and neck	injuries & poisonings
250.3	0.213844	1.22538	0.80625	1.64452	0.341869	7295	153	7142	FALSE	Insulin pump user	endocrine/metabolic
278.4	0.332778	0.737699	0.0854536	1.38994	0.360622	6832	112	6720	FALSE	Abnormal weight gain	endocrine/metabolic
327.3	0.160635	1.15774	0.842899	1.47259	0.361854	6966	340	6626	FALSE	Sleep apnea	neurological
599.4	0.2688	1.2767	0.749851	1.80355	0.363471	6343	113	6230	FALSE	Urinary incontinence	genitourinary
78	0.265744	1.27272	0.75186	1.79358	0.364158	5421	170	5251	FALSE	Viral warts & HPV	infectious diseases
701	0.289319	0.773089	0.206022	1.34015	0.373712	7672	129	7543	FALSE	Other hypertrophic and atrophic conditions of skin	dermatologic
350	0.179007	1.17045	0.819599	1.5213	0.379271	7661	215	7446	FALSE	Abnormal movement	neurological
792.1	0.193348	1.18239	0.803424	1.56135	0.38622	7554	193	7361	FALSE	Papanicolaou smear of cervix or vagina with atypical squamous cells	genitourinary
278.11	0.202387	1.18892	0.792241	1.5856	0.39254	6908	188	6720	FALSE	Morbid obesity	endocrine/metabolic
742	0.365994	0.731444	0.0140947	1.44879	0.392839	6997	108	6889	FALSE	Derangement of joint, non-traumatic	musculoskeletal
764	0.214595	1.19841	0.7778	1.61901	0.398998	7246	166	7080	FALSE	Sciatica	symptoms
704	0.308911	0.772369	0.166903	1.37783	0.403076	7500	122	7378	FALSE	Diseases of hair and hair follicles	dermatologic
250.1	0.235961	1.21731	0.754828	1.67979	0.404632	7270	128	7142	FALSE	Type 1 diabetes	endocrine/metabolic
250.2	0.13676	1.11719	0.849143	1.38524	0.417758	7600	458	7142	FALSE	Type 2 diabetes	endocrine/metabolic
593	0.236686	0.827146	0.363242	1.29105	0.422671	6054	174	5880	FALSE	Hematuria	genitourinary
586	0.20911	1.17452	0.764666	1.58438	0.441738	7202	158	7044	FALSE	Other disorders of the kidney and ureters	genitourinary
272.11	0.249992	0.828831	0.338847	1.31881	0.452664	7047	200	6847	FALSE	Hypercholesterolemia	endocrine/metabolic
792	0.190187	1.15163	0.778864	1.5244	0.457898	7566	205	7361	FALSE	Abnormal Papanicolaou smear of cervix and cervical HPV	genitourinary
340	0.150348	1.11748	0.822797	1.41216	0.460036	7144	375	6769	FALSE	Migraine	neurological
763	0.207507	1.16497	0.75826	1.57169	0.461808	7266	186	7080	FALSE	Thoracic or lumbosacral neuritis or radiculitis, unspecified	symptoms
626	0.157699	0.890682	0.581592	1.19977	0.462884	7031	432	6599	FALSE	Disorders of menstruation and other abnormal bleeding from female genital tract	genitourinary
351	0.195213	1.15048	0.767858	1.53309	0.472717	7275	221	7054	FALSE	Other peripheral nerve disorders	neurological
721	0.190441	0.87341	0.500145	1.24667	0.477257	6777	267	6510	FALSE	Spondylosis and allied disorders	musculoskeletal
626.12	0.298504	0.810914	0.225847	1.39598	0.482587	6732	133	6599	FALSE	Excessive or frequent menstruation	genitourinary
870	0.188309	1.14028	0.771194	1.50937	0.485729	6695	180	6515	FALSE	Open wounds of head; neck; and trunk	injuries & poisonings
721.1	0.194889	0.873553	0.49157	1.25554	0.487895	6768	258	6510	FALSE	Spondylosis without myelopathy	musculoskeletal
772.2	0.238485	0.848171	0.380741	1.3156	0.489883	7304	155	7149	FALSE	Spasm of muscle	symptoms
561	0.187631	1.13112	0.763359	1.49887	0.511416	6614	204	6410	FALSE	Symptoms involving digestive system	digestive
272	0.131826	0.924415	0.666035	1.18279	0.551044	7587	740	6847	FALSE	Disorders of lipoid metabolism	endocrine/metabolic
599	0.126071	1.07626	0.82916	1.32336	0.559936	6827	597	6230	FALSE	Other symptoms/disorders or the urinary system	genitourinary
626.1	0.179541	0.901925	0.550024	1.25383	0.565336	6930	331	6599	FALSE	Irregular menstrual cycle/bleeding	genitourinary
801	0.172663	1.10149	0.763066	1.43991	0.575604	6393	279	6114	FALSE	Fracture of ankle and foot	injuries & poisonings
687.1	0.161138	0.915941	0.600111	1.23177	0.585824	6647	413	6234	FALSE	Rash and other nonspecific skin eruption	dermatologic
745	0.0950179	1.05179	0.86555	1.23802	0.595168	6322	1445	4877	FALSE	Pain in joint	musculoskeletal
427.9	0.185191	0.908868	0.545893	1.27184	0.605869	6381	307	6074	FALSE	Palpitations	circulatory system
272.1	0.132141	0.934974	0.675978	1.19397	0.610872	7582	735	6847	FALSE	Hyperlipidemia	endocrine/metabolic
809	0.163452	1.08609	0.76572	1.40645	0.613398	6373	259	6114	FALSE	Fracture of unspecified bones	injuries & poisonings
339	0.183184	1.08938	0.730339	1.44842	0.640258	6995	226	6769	FALSE	Other headache syndromes	neurological
747	0.263804	0.88409	0.367034	1.40115	0.6405	7870	117	7753	FALSE	Cardiac and circulatory congenital anomalies	congenital anomalies
599.3	0.151267	1.07085	0.774371	1.36734	0.650871	6626	396	6230	FALSE	Dysuria	genitourinary
250	0.130075	1.05894	0.803988	1.31388	0.659761	7643	501	7142	FALSE	Diabetes mellitus	endocrine/metabolic
479	0.210787	0.918671	0.505529	1.33181	0.687365	5037	190	4847	FALSE	Other upper respiratory disease	respiratory
803.2	0.192752	1.07893	0.701133	1.45672	0.693496	6367	253	6114	FALSE	Fracture of radius and ulna	injuries & poisonings
327.32	0.177201	1.0703	0.722983	1.41761	0.701436	6913	287	6626	FALSE	Obstructive sleep apnea	neurological
788	0.176508	0.935393	0.589438	1.28135	0.705142	7663	242	7421	FALSE	Syncope and collapse	symptoms
261.4	0.185134	1.06682	0.703954	1.42968	0.72682	7223	250	6973	FALSE	Vitamin D deficiency	endocrine/metabolic
558	0.216955	1.07517	0.64994	1.5004	0.738319	6573	163	6410	FALSE	Noninfectious gastroenteritis	digestive
722	0.142036	1.04839	0.769998	1.32678	0.739364	6986	476	6510	FALSE	Intervertebral disc disorders	musculoskeletal
427.2	0.277925	0.915599	0.370866	1.46033	0.751041	6204	130	6074	FALSE	Atrial fibrillation and flutter	circulatory system
687.4	0.204186	0.938362	0.538158	1.33857	0.755364	6429	195	6234	FALSE	Disturbance of skin sensation	dermatologic
740	0.15746	0.95483	0.646207	1.26345	0.769103	7459	487	6972	FALSE	Osteoarthrosis	musculoskeletal
740.1	0.185231	0.948203	0.585149	1.31126	0.774006	7325	353	6972	FALSE	Osteoarthritis; localized	musculoskeletal
536	0.268717	1.07048	0.543793	1.59717	0.799921	7475	100	7375	FALSE	Disorders of function of stomach	digestive
747.1	0.27247	0.936173	0.402132	1.47022	0.808733	7859	106	7753	FALSE	Cardiac congenital anomalies	congenital anomalies
368	0.263145	0.94324	0.427477	1.459	0.824265	7595	134	7461	FALSE	Visual disturbances	sense organs
348	0.223149	0.951848	0.514475	1.38922	0.824974	6749	137	6612	FALSE	Other conditions of brain	neurological
564.1	0.253892	0.953576	0.455947	1.4512	0.851479	6549	139	6410	FALSE	Irritable Bowel Syndrome	digestive
766	0.272374	1.05036	0.51651	1.58421	0.856842	7191	111	7080	FALSE	Neuralgia, neuritis, and radiculitis NOS	symptoms
480	0.124725	0.977847	0.733386	1.22231	0.857458	5974	506	5468	FALSE	Pneumonia	respiratory
722.1	0.233746	1.03738	0.57924	1.49553	0.875236	6675	165	6510	FALSE	Displacement of intervertebral disc	musculoskeletal
805	0.171246	1.02297	0.687327	1.35861	0.8945	6340	226	6114	FALSE	Fracture of vertebral column without mention of spinal cord injury	injuries & poisonings
741	0.161278	1.0194	0.703291	1.3355	0.905189	7220	331	6889	FALSE	Symptoms and disorders of the joints	musculoskeletal
765	0.288171	0.966348	0.401533	1.53116	0.905443	7195	115	7080	FALSE	Cervical radiculitis	symptoms
804	0.230629	0.973667	0.521635	1.4257	0.907883	6314	200	6114	FALSE	Fracture of hand or wrist	injuries & poisonings
532	0.190079	0.979288	0.606733	1.35184	0.912321	6401	225	6176	FALSE	Dysphagia	digestive
350.2	0.24865	1.02742	0.540069	1.51478	0.91336	7561	115	7446	FALSE	Abnormality of gait	neurological
550	0.196753	1.02161	0.635977	1.40725	0.91346	7707	212	7495	FALSE	Abdominal hernia	digestive
761	0.130073	0.987629	0.732687	1.24257	0.92376	7305	555	6750	FALSE	Cervicalgia	symptoms
480.1	0.229258	0.980828	0.531483	1.43017	0.932706	5597	129	5468	FALSE	Bacterial pneumonia	respiratory
427.21	0.279887	0.977589	0.42901	1.52617	0.935455	6201	127	6074	FALSE	Atrial fibrillation	circulatory system
592	0.245204	0.981861	0.501261	1.46246	0.94049	6014	134	5880	FALSE	Cystitis and urethritis	genitourinary
741.2	0.268576	0.985288	0.458879	1.5117	0.95599	7022	133	6889	FALSE	Stiffness of joint	musculoskeletal
592.1	0.251832	0.987681	0.49409	1.48127	0.960743	6007	127	5880	FALSE	Cystitis	genitourinary
835	0.301802	0.986258	0.394726	1.57779	0.963431	7405	136	7269	FALSE	Internal derangement of knee	injuries & poisonings
216	483.978	8.77316e-08	-948.596	948.596	0.973217	7604	115	7489	FALSE	Benign neoplasm of skin	neoplasms
803	0.147717	1.0046	0.71507	1.29412	0.975237	6540	426	6114	FALSE	Fracture of upper limb	injuries & poisonings
740.11	0.193797	1.00031	0.620465	1.38015	0.998737	7290	318	6972	FALSE	Osteoarthrosis, localized, primary	musculoskeletal

## Sheet: Supplementary table 4
Supplementary table 4: PheWAS of presence or absence of buprenorphine prescription
phenotype	SE	OR	upper 95% CI	lower 95% CI	p	n_total	n_cases	n_controls	description	group
70	0.0438967	14.2817	14.3677	14.1957	0	626126	7821	618305	Viral hepatitis	infectious diseases
70.3	0.0450675	16.3744	16.4627	16.2861	0	624870	6565	618305	Viral hepatitis C	infectious diseases
296	0.0263966	6.6963	6.74804	6.64456	0	622535	65858	556677	Mood disorders	mental disorders
296.1	0.035675	13.772	13.8419	13.7021	0	570317	13640	556677	Bipolar	mental disorders
296.2	0.0297267	5.84297	5.90123	5.7847	0	610355	53678	556677	Depression	mental disorders
296.22	0.0337023	6.90751	6.97356	6.84145	0	587104	30427	556677	Major depressive disorder	mental disorders
297	0.0408938	15.7426	15.8227	15.6624	0	565006	8329	556677	Suicidal ideation or attempt	mental disorders
297.1	0.0424456	17.4981	17.5813	17.4149	0	563689	7012	556677	Suicidal ideation	mental disorders
300	0.0278641	5.74764	5.80225	5.69302	0	615814	59137	556677	Anxiety disorders	mental disorders
300.1	0.0316394	4.87864	4.94065	4.81663	0	604562	47885	556677	Anxiety disorder	mental disorders
300.9	0.0387062	17.2906	17.3665	17.2147	0	565710	9033	556677	Posttraumatic stress disorder	mental disorders
301	0.0706563	16.3444	16.4829	16.2059	0	559073	2396	556677	Personality disorders	mental disorders
306.1	0.0688263	39.8469	39.9818	39.712	0	558147	1470	556677	Mental disorders durring/after pregnancy	mental disorders
316	0.0262268	33.7373	33.7887	33.6859	0	669113	17415	651698	Substance addiction and disorders	mental disorders
317	0.0397745	16.1986	16.2766	16.1207	0	662698	11000	651698	Alcohol-related disorders	mental disorders
317.1	0.04816	15.2866	15.381	15.1922	0	659124	7426	651698	Alcoholism	mental disorders
318	0.0314121	11.0093	11.0708	10.9477	0	684844	33146	651698	Tobacco use disorder	mental disorders
464	0.0393478	4.5218	4.59892	4.44468	0	549446	29393	520053	Acute sinusitis	respiratory
465	0.0263289	4.95933	5.01093	4.90772	0	620557	100504	520053	Acute upper respiratory infections of multiple or unspecified sites	respiratory
465.2	0.0306	6.76259	6.82256	6.70261	0	563824	43771	520053	Acute pharyngitis	respiratory
338.2	0.0401833	4.4783	4.55706	4.39954	1.12568e-304	687731	23091	664640	Chronic pain	neurological
760	0.031274	3.12494	3.18624	3.06364	1.26332e-290	683833	65797	618036	Back pain	symptoms
301.2	0.0860755	18.3301	18.4988	18.1614	2.7087e-250	558074	1397	556677	Antisocial/borderline personality disorder	mental disorders
647	0.0923407	18.6529	18.8339	18.4719	2.34693e-220	741456	1037	740419	Infectious and parasitic complications affecting pregnancy	pregnancy complications
338	0.0339614	2.93149	2.99806	2.86493	4.19942e-220	711572	46932	664640	Pain	neurological
681.3	0.0688958	6.87817	7.01321	6.74314	2.18535e-172	659383	4264	655119	Cellulitis and abscess of arm/hand	dermatologic
785	0.0291809	2.24248	2.29967	2.18528	1.39745e-168	645843	88457	557386	Abdominal pain	symptoms
295	0.0690266	6.29663	6.43193	6.16134	1.5002e-156	563794	7117	556677	Schizophrenia and other psychotic disorders	mental disorders
300.12	0.0730974	6.79847	6.94174	6.6552	1.52476e-151	561323	4646	556677	Agorophobia, social phobia, and panic disorder	mental disorders
649	0.0551198	4.12176	4.2298	4.01373	1.34316e-145	734208	10012	724196	Other conditions or status of the mother complicating pregnancy, childbirth, or the puerperium	pregnancy complications
681	0.0406706	2.8271	2.90682	2.74739	5.09164e-144	684575	29456	655119	Superficial cellulitis and abscess	dermatologic
798	0.0316071	2.23563	2.29758	2.17368	6.38738e-143	668470	80726	587744	Malaise and fatigue	symptoms
474.1	0.0885157	9.44433	9.61782	9.27084	5.77365e-142	543030	1747	541283	Acute tonsillitis	respiratory
297.2	0.0957488	10.2294	10.417	10.0417	2.82131e-130	558452	1775	556677	Suicide or self-inflicted injury	mental disorders
512.8	0.0329222	2.22194	2.28647	2.15742	6.52458e-130	559636	69561	490075	Cough	respiratory
292.4	0.0529672	3.54688	3.65069	3.44306	2.86015e-126	684189	16027	668162	Altered mental status	mental disorders
300.11	0.0600423	4.0385	4.15618	3.92082	1.48469e-119	568230	11553	556677	Generalized anxiety disorder	mental disorders
512	0.0282625	1.87941	1.9348	1.82401	2.12102e-110	623420	133345	490075	Other symptoms of respiratory system	respiratory
655	0.0501722	3.03897	3.13731	2.94063	9.53176e-109	736188	16181	720007	Known or suspected fetal abnormality affecting management of mother	pregnancy complications
338.1	0.0431773	2.57183	2.65645	2.4872	4.24457e-106	694289	29649	664640	Acute pain	neurological
646	0.08084	5.75065	5.90909	5.5922	7.68576e-104	743405	3252	740153	Other complications of pregnancy NEC	pregnancy complications
295.2	0.116097	11.0215	11.2491	10.794	6.31031e-95	558036	1359	556677	Paranoid disorders	mental disorders
418	0.0335829	1.989	2.05482	1.92318	3.54683e-93	669606	82621	586985	Nonspecific chest pain	circulatory system
355.1	0.0755256	4.6148	4.76283	4.46677	3.67503e-91	700341	5710	694631	Chronic pain syndrome	neurological
969	0.105029	8.33556	8.54141	8.1297	1.19925e-90	665528	1253	664275	Poisoning by psychotropic agents	injuries & poisonings
591	0.0380773	2.07976	2.15439	2.00513	2.05013e-82	672395	49517	622878	Urinary tract infection	genitourinary
300.4	0.0818097	4.79071	4.95105	4.63036	9.62694e-82	562478	5801	556677	Dysthymic disorder	mental disorders
41.12	0.083827	4.91515	5.07945	4.75085	1.86379e-80	692625	3452	689173	Methicillin resistant Staphylococcus aureus	infectious diseases
483	0.0473234	2.44988	2.54264	2.35713	5.93842e-80	633722	22650	611072	Acute bronchitis and bronchiolitis	respiratory
722	0.0489735	2.51871	2.6147	2.42272	2.3337e-79	683911	28886	655025	Intervertebral disc disorders	musculoskeletal
304	0.0616153	3.1195	3.24027	2.99873	4.01476e-76	571419	14742	556677	Adjustment reaction	mental disorders
303.4	0.111352	7.78733	8.00558	7.56908	7.20912e-76	558416	1739	556677	Somatoform disorder	mental disorders
303	0.10262	6.498	6.69914	6.29686	2.62221e-74	559169	2492	556677	Psychogenic and somatoform disorders	mental disorders
41.1	0.0622297	3.10786	3.22983	2.98589	3.46854e-74	698691	9518	689173	Staphylococcus infections	infectious diseases
761	0.0450494	2.26016	2.34845	2.17186	3.13645e-73	716284	29741	686543	Cervicalgia	symptoms
636	0.0620402	3.06607	3.18767	2.94447	6.6769e-73	729095	10189	718906	Early or threatened labor; hemorrhage in early pregnancy	pregnancy complications
474	0.0568482	2.76471	2.87613	2.65329	1.44695e-71	561687	20404	541283	Acute and chronic tonsillitis	respiratory
745	0.0305881	1.72554	1.78549	1.66559	3.77602e-71	643138	105667	537471	Pain in joint	musculoskeletal
647.1	0.107527	6.78727	6.99802	6.57651	5.92061e-71	742162	1743	740419	Infections of genitourinary tract during pregnancy	pregnancy complications
295.3	0.0956054	5.46497	5.65236	5.27759	1.33674e-70	560691	4014	556677	Psychosis	mental disorders
512.7	0.0409202	2.05909	2.13929	1.97889	1.00765e-69	551724	61649	490075	Shortness of breath	respiratory
771.1	0.0546593	2.53647	2.64361	2.42934	5.03402e-65	719337	16853	702484	Swelling of limb	symptoms
994	0.0597248	2.75666	2.87372	2.6396	1.19041e-64	743817	14153	729664	Sepsis and SIRS	injuries & poisonings
770	0.0533707	2.47074	2.57535	2.36613	1.99668e-64	724969	18689	706280	Myalgia and myositis unspecified	symptoms
979	0.0767961	3.63736	3.78788	3.48684	1.92353e-63	670391	6116	664275	Adverse drug events and drug allergies	injuries & poisonings
291	0.0642492	2.93932	3.06524	2.81339	3.35225e-63	679537	11375	668162	Other specified nonpsychotic and/or transient mental disorders	mental disorders
292	0.0454993	2.13623	2.22541	2.04706	1.75536e-62	700355	32193	668162	Neurological disorders	mental disorders
994.2	0.0622493	2.8099	2.93191	2.68789	7.33021e-62	742557	12893	729664	Sepsis	injuries & poisonings
614	0.0616742	2.75463	2.87552	2.63375	1.17375e-60	721820	12578	709242	Inflammatory diseases of female pelvic organs	genitourinary
295.1	0.106498	5.71909	5.92783	5.51036	2.92525e-60	559888	3211	556677	Schizophrenia	mental disorders
655.1	0.0732956	3.29227	3.43593	3.14861	1.9885e-59	726886	6879	720007	Abnormality in fetal heart rate or rhythm	pregnancy complications
681.5	0.0692631	3.05707	3.19283	2.92131	1.48319e-58	664401	9282	655119	Cellulitis and abscess of leg, except foot	dermatologic
79	0.055777	2.4546	2.56393	2.34528	2.58423e-58	641431	23126	618305	Viral infection	infectious diseases
381.11	0.0500271	2.19801	2.29607	2.09996	7.72797e-56	660071	31904	628167	Suppurative and unspecified otitis media	sense organs
38	0.0548879	2.36343	2.47101	2.25585	2.41151e-55	708083	18910	689173	Septicemia	infectious diseases
70.2	0.129958	7.65112	7.90584	7.3964	2.94106e-55	619778	1473	618305	Viral hepatitis B	infectious diseases
789	0.0372691	1.79038	1.86343	1.71733	4.71943e-55	675859	50419	625440	Nausea and vomiting	symptoms
614.5	0.0674905	2.84629	2.97857	2.714	3.5396e-54	719392	10150	709242	Inflammatory disease of cervix, vagina, and vulva	genitourinary
420.3	0.115009	5.89613	6.12155	5.67072	1.07029e-53	721081	1705	719376	Endocarditis	circulatory system
41	0.0476856	2.08106	2.17452	1.9876	2.64467e-53	714496	25323	689173	Bacterial infection NOS	infectious diseases
722.6	0.0587908	2.45416	2.56939	2.33893	1.1968e-52	676624	21599	655025	Degeneration of intervertebral disc	musculoskeletal
512.2	0.0916756	3.98632	4.16601	3.80664	2.05206e-51	494779	4704	490075	Painful respiration	respiratory
965	0.103999	4.71255	4.91639	4.50871	3.00297e-50	666704	2429	664275	Poisoning by analgesics, antipyretics, and antirheumatics	injuries & poisonings
599.3	0.0529958	2.16782	2.27169	2.06395	2.82195e-48	647135	20117	627018	Dysuria	genitourinary
721.1	0.0652772	2.5833	2.71124	2.45536	6.85509e-48	671636	16611	655025	Spondylosis without myelopathy	musculoskeletal
476	0.0370616	1.69541	1.76805	1.62277	4.85055e-46	599982	58699	541283	Allergic rhinitis	respiratory
721	0.0641912	2.4923	2.61812	2.36649	6.28753e-46	672857	17832	655025	Spondylosis and allied disorders	musculoskeletal
965.1	0.104465	4.36723	4.57198	4.16247	3.23782e-45	667282	3007	664275	Opiates and related narcotics causing adverse effects in therapeutic use	injuries & poisonings
276.14	0.0547744	2.16429	2.27165	2.05694	4.02526e-45	641749	23087	618662	Hypopotassemia	endocrine/metabolic
291.8	0.07565	2.89451	3.04278	2.74623	7.80154e-45	677114	8952	668162	Alteration of consciousness	mental disorders
418.1	0.0926845	3.67361	3.85527	3.49195	9.02973e-45	592564	5579	586985	Precordial pain	circulatory system
614.52	0.0741195	2.83017	2.97544	2.6849	9.39513e-45	717744	8502	709242	Vaginitis and vulvovaginitis	genitourinary
686	0.0822305	3.14529	3.30646	2.98412	3.86578e-44	661087	5968	655119	Other local infections of skin and subcutaneous tissue	dermatologic
729	0.063438	2.38694	2.51128	2.2626	8.33177e-43	634618	12680	621938	Other disorders of soft tissues	musculoskeletal
480	0.0471047	1.90482	1.99714	1.81249	1.33891e-42	644513	33441	611072	Pneumonia	respiratory
290.2	0.118683	4.86416	5.09678	4.63154	1.57644e-40	670751	2589	668162	Delirium due to conditions classified elsewhere	mental disorders
381.1	0.0474986	1.87935	1.97245	1.78626	2.90141e-40	664746	36579	628167	Otitis media	sense organs
276.1	0.0448506	1.8102	1.89811	1.7223	5.7748e-40	661953	43291	618662	Electrolyte imbalance	endocrine/metabolic
805	0.0690583	2.49306	2.62842	2.35771	6.03699e-40	635197	10577	624620	Fracture of vertebral column without mention of spinal cord injury	injuries & poisonings
38.2	0.117689	4.70051	4.93118	4.46984	1.68905e-39	691275	2102	689173	Gram positive septicemia	infectious diseases
41.11	0.0879094	3.17727	3.34957	3.00497	1.69838e-39	693768	4595	689173	Methicillin sensitive Staphylococcus aureus	infectious diseases
643	0.140655	5.96692	6.2426	5.69123	5.96167e-37	747311	1059	746252	Excessive vomiting in pregnancy	pregnancy complications
967	0.150416	6.73233	7.02715	6.43752	7.86721e-37	665015	740	664275	Adverse effects of sedatives or other central nervous system depressants and anesthetics	injuries & poisonings
276	0.0370249	1.59764	1.6702	1.52507	1.05884e-36	683414	64752	618662	Disorders of fluid, electrolyte, and acid-base balance	endocrine/metabolic
710	0.0851919	2.93559	3.10257	2.76862	1.25471e-36	690130	5813	684317	Osteomyelitis, periostitis, and other infections involving bone	musculoskeletal
783	0.0360529	1.57679	1.64745	1.50612	1.42202e-36	676916	63958	612958	Fever of unknown origin	symptoms
313.1	0.0593724	2.09643	2.2128	1.98006	1.12034e-35	701126	16591	684535	Attention deficit hyperactivity disorder	mental disorders
427.7	0.0524282	1.91971	2.02246	1.81695	1.59841e-35	617714	23039	594675	Tachycardia NOS	circulatory system
327.4	0.0580487	2.05374	2.16751	1.93996	2.69487e-35	658257	18158	640099	Insomnia	neurological
764	0.0801244	2.69946	2.85651	2.54242	2.8202e-35	703797	8856	694941	Sciatica	symptoms
642	0.0875817	2.95463	3.12629	2.78297	3.80434e-35	746127	4699	741428	Hypertension complicating pregnancy, childbirth, and the puerperium	pregnancy complications
54	0.0979865	3.35252	3.54457	3.16046	5.13926e-35	622408	4103	618305	Herpes simplex	infectious diseases
625	0.0704689	2.38199	2.5201	2.24387	7.37676e-35	717611	9328	708283	Pain and other symptoms associated with female genital organs	genitourinary
840	0.0492461	1.83245	1.92898	1.73593	9.22059e-35	681654	26792	654862	Sprains and strains	injuries & poisonings
687.1	0.0513847	1.87088	1.97159	1.77016	3.49081e-34	666855	23744	643111	Rash and other nonspecific skin eruption	dermatologic
401.1	0.0326926	1.48929	1.55337	1.42522	3.81832e-34	699570	157557	542013	Essential hypertension	circulatory system
525	0.106054	3.63771	3.84558	3.42985	4.14989e-34	701399	2924	698475	Other diseases of the teeth and supporting structures	digestive
38.3	0.0754822	2.49315	2.64109	2.3452	1.02071e-33	697793	8620	689173	Bacteremia	infectious diseases
317.11	0.14289	5.62674	5.9068	5.34667	1.19425e-33	653686	1988	651698	Alcoholic liver damage	mental disorders
977	0.0909546	2.96173	3.14	2.78346	7.54231e-33	670077	5802	664275	Personal history of allergy to medicinal agents	injuries & poisonings
401	0.0325615	1.4693	1.53312	1.40548	3.1796e-32	702298	160285	542013	Hypertension	circulatory system
710.1	0.0930672	2.988	3.17041	2.80559	6.16637e-32	689052	4735	684317	Osteomyelitis	musculoskeletal
636.1	0.104996	3.3782	3.584	3.17241	4.40739e-31	722035	3129	718906	Threatened premature labor	pregnancy complications
841	0.0915082	2.8814	3.06076	2.70205	6.21105e-31	660313	5451	654862	Sprains and strains of back and neck	injuries & poisonings
722.9	0.166811	6.66603	6.99298	6.33908	5.74633e-30	655878	853	655025	Other and unspecified disc disorder	musculoskeletal
635	0.110081	3.47462	3.69037	3.25886	1.11581e-29	721661	2755	718906	Hemorrhage during pregnancy; childbirth and postpartum	pregnancy complications
782.3	0.0578831	1.9239	2.03735	1.81045	1.24288e-29	714978	25568	689410	Edema	symptoms
522	0.135261	4.59718	4.86229	4.33207	1.68953e-29	699896	1421	698475	Diseases of pulp and periapical tissues	digestive
772.4	0.149152	5.34686	5.63919	5.05452	2.58702e-29	696134	1218	694916	Rhabdomyolysis	symptoms
635.2	0.124317	4.04013	4.2838	3.79647	2.85419e-29	720779	1873	718906	Antepartum hemorrhage, abruptio placentae, and placenta previa	pregnancy complications
722.1	0.0802139	2.45884	2.61606	2.30162	3.39786e-29	663642	8617	655025	Displacement of intervertebral disc	musculoskeletal
960	0.0856205	2.59473	2.76254	2.42691	8.36755e-29	670816	6541	664275	Poisoning by antibiotics	injuries & poisonings
290	0.105843	3.24358	3.45103	3.03613	1.03406e-28	677678	9516	668162	Delirium dementia and amnestic and other cognitive disorders	mental disorders
474.2	0.0680799	2.12817	2.26161	1.99474	1.34476e-28	559967	18684	541283	Chronic tonsillitis and adenoiditis	respiratory
686.1	0.128423	4.14438	4.39609	3.89267	1.73759e-28	656965	1846	655119	Carbuncle and furuncle	dermatologic
288.2	0.0675167	2.1013	2.23364	1.96897	3.90087e-28	677010	13650	663360	Elevated white blood cell count	hematopoietic
980	0.084911	2.52257	2.689	2.35615	1.19066e-27	741775	6414	735361	Encounter for long-term (current) use of antibiotics	infectious diseases
381	0.0409772	1.56279	1.6431	1.48247	1.20964e-27	676941	48774	628167	Otitis media and Eustachian tube disorders	sense organs
522.5	0.138811	4.52561	4.79768	4.25354	1.49491e-27	699845	1370	698475	Periapical abscess	digestive
340	0.0539363	1.79398	1.89969	1.68826	2.33274e-27	703538	19549	683989	Migraine	neurological
871	0.0698132	2.10551	2.24235	1.96868	1.48387e-26	680565	11439	669126	Open wounds of extremities	injuries & poisonings
653	0.097069	2.76962	2.95987	2.57936	9.13788e-26	738188	4123	734065	Problems associated with amniotic cavity and membranes	pregnancy complications
585.1	0.0583715	1.83816	1.95256	1.72375	1.82593e-25	689078	26161	662917	Acute renal failure	genitourinary
722.8	0.123035	3.59447	3.83562	3.35333	2.51429e-25	658124	3099	655025	Postlaminectomy syndrome	musculoskeletal
807	0.0961736	2.67241	2.86091	2.48391	1.59886e-24	629585	4965	624620	Fracture of ribs	injuries & poisonings
306	0.0799599	2.25982	2.41654	2.1031	2.0626e-24	569804	13127	556677	Other mental disorder	mental disorders
710.19	0.106868	2.96397	3.17343	2.75451	2.78381e-24	687854	3537	684317	Unspecified osteomyelitis	musculoskeletal
276.5	0.048463	1.63147	1.72645	1.53648	5.52159e-24	649507	30845	618662	Hypovolemia	endocrine/metabolic
960.2	0.106247	2.88287	3.09111	2.67462	2.16219e-23	668299	4024	664275	Allergy/adverse effect of penicillin	injuries & poisonings
870	0.0768023	2.14751	2.29805	1.99698	2.47997e-23	678227	9101	669126	Open wounds of head; neck; and trunk	injuries & poisonings
636.2	0.125788	3.49094	3.73749	3.2444	2.82519e-23	720988	2082	718906	Early onset of delivery	pregnancy complications
681.7	0.0891552	2.41724	2.59198	2.24249	4.16791e-23	661357	6238	655119	Cellulitis and abscess of trunk	dermatologic
497	0.0900211	2.43743	2.61387	2.26099	4.28699e-23	636629	6420	630209	Bronchitis	respiratory
801	0.0618891	1.8408	1.9621	1.7195	6.23016e-23	639620	15000	624620	Fracture of ankle and foot	injuries & poisonings
276.41	0.0726154	2.03479	2.17711	1.89246	1.33287e-22	631511	12849	618662	Acidosis	endocrine/metabolic
382	0.0794747	2.17571	2.33148	2.01994	1.35618e-22	635968	7801	628167	Otalgia	sense organs
577.2	0.14252	4.02482	4.30416	3.74548	1.50838e-22	740763	1465	739298	Chronic pancreatitis	digestive
819	0.0757497	2.08774	2.23621	1.93927	2.5446e-22	726620	8523	718097	Skull and face fracture and other intercranial injury	injuries & poisonings
420	0.093084	2.46832	2.65076	2.28587	2.82363e-22	725051	5675	719376	Carditis	circulatory system
496	0.0659574	1.89619	2.02547	1.76691	2.98809e-22	652556	22347	630209	Chronic airway obstruction	respiratory
720	0.0811446	2.19653	2.35557	2.03749	3.09755e-22	669726	14701	655025	Spinal stenosis	musculoskeletal
276.4	0.0702755	1.97653	2.11427	1.83879	3.15765e-22	632615	13953	618662	Acid-base balance disorder	endocrine/metabolic
292.6	0.151436	4.31804	4.61486	4.02123	4.47913e-22	669413	1251	668162	Hallucinations	mental disorders
706.1	0.0676892	1.91553	2.0482	1.78286	7.79114e-22	705840	11403	694437	Acne	dermatologic
578	0.0592403	1.75252	1.86863	1.63641	2.77704e-21	689469	19553	669916	Gastrointestinal hemorrhage	digestive
512.1	0.0773389	2.07694	2.22853	1.92536	3.36941e-21	501276	11201	490075	Wheezing	respiratory
71.1	0.114563	2.93987	3.16441	2.71533	4.82788e-21	623021	4716	618305	HIV infection, symptomatic	infectious diseases
481	0.0726762	1.97792	2.12036	1.83547	6.30906e-21	622701	11629	611072	Influenza	respiratory
614.33	0.186315	5.71322	6.07839	5.34804	8.44233e-21	709957	715	709242	Pelvic inflammatory disease, NOS	genitourinary
197	0.110787	0.355038	0.57218	0.137895	9.0123e-21	696315	25434	670881	Chemotherapy	neoplasms
136	0.125026	3.19389	3.43894	2.94884	1.57231e-20	731344	2205	729139	Other infectious and parasitic diseases	infectious diseases
313	0.0567952	1.69244	1.80376	1.58112	1.96326e-20	707831	23296	684535	Pervasive developmental disorders	mental disorders
579	0.0722905	1.94668	2.08837	1.80499	3.12455e-20	681281	11365	669916	Other symptoms involving abdomen and pelvis	digestive
71	0.114496	2.86056	3.08497	2.63615	4.33027e-20	623130	4825	618305	Human immunodeficiency virus [HIV] disease	infectious diseases
740.1	0.0566011	1.68037	1.79131	1.56943	4.74302e-20	686358	36678	649680	Osteoarthritis; localized	musculoskeletal
573.4	0.156713	4.14672	4.45388	3.83956	1.12706e-19	689903	1160	688743	Acute and subacute necrosis of liver	digestive
288	0.0634697	1.7704	1.89481	1.646	2.26336e-19	681288	17928	663360	Diseases of white blood cells	hematopoietic
312	0.0926988	2.289	2.47069	2.10731	4.13105e-19	691218	6683	684535	Conduct disorders	mental disorders
619.4	0.0990902	2.4186	2.61282	2.22439	4.967e-19	720352	4747	715605	Noninflammatory disorders of vagina	genitourinary
79.2	0.16439	4.32064	4.64284	3.99843	5.48393e-19	619349	1044	618305	Infectious mononucleosis	infectious diseases
626	0.0517924	1.58414	1.68565	1.48263	6.54344e-19	679402	26982	652420	Disorders of menstruation and other abnormal bleeding from female genital tract	genitourinary
800.4	0.126972	3.08236	3.33123	2.8335	7.6034e-19	626857	2237	624620	Fracture of patella	injuries & poisonings
78	0.0787248	2.00206	2.15636	1.84776	1.16758e-18	627858	9553	618305	Viral warts & HPV	infectious diseases
452	0.0762468	1.95683	2.10627	1.80738	1.31295e-18	682115	11810	670305	Other venous embolism and thrombosis	circulatory system
285	0.0419837	1.44636	1.52865	1.36407	1.49119e-18	685164	57176	627988	Other anemias	hematopoietic
592.1	0.0913751	2.23163	2.41073	2.05254	1.56303e-18	630067	7189	622878	Cystitis	genitourinary
172	0.302225	0.0704425	0.662804	-0.521919	1.66296e-18	711025	24835	686190	Skin cancer	neoplasms
681.2	0.11077	2.64012	2.85723	2.42301	1.87877e-18	658764	3645	655119	Cellulitis and abscess of face/neck	dermatologic
592	0.0888815	2.16764	2.34185	1.99343	3.19941e-18	630590	7712	622878	Cystitis and urethritis	genitourinary
496.21	0.122196	2.88706	3.12657	2.64756	4.08013e-18	635691	5482	630209	Obstructive chronic bronchitis	respiratory
636.3	0.105481	2.49675	2.70349	2.29001	4.1566e-18	722871	3965	718906	Hemorrhage in early pregnancy	pregnancy complications
654.1	0.133654	3.17491	3.43687	2.91295	5.43735e-18	736019	1954	734065	Abnormality of organs and soft tissues of pelvis complicating pregnancy, childbirth, or the puerperium	pregnancy complications
389	0.0696342	0.547799	0.684282	0.411315	5.47633e-18	713690	36141	677549	Hearing loss	sense organs
763	0.0755162	1.91849	2.06651	1.77048	6.25304e-18	708530	13589	694941	Thoracic or lumbosacral neuritis or radiculitis, unspecified	symptoms
733.8	0.103903	2.45087	2.65452	2.24722	6.26186e-18	653656	4103	649553	Malunion and nonunion of fracture	musculoskeletal
740	0.0490901	1.52726	1.62347	1.43104	6.32755e-18	706259	56579	649680	Osteoarthrosis	musculoskeletal
994.1	0.12679	2.97204	3.22055	2.72353	8.62521e-18	732328	2664	729664	Systemic inflammatory response syndrome (SIRS)	injuries & poisonings
512.9	0.0470391	1.49611	1.58831	1.40391	1.08499e-17	538815	48740	490075	Other dyspnea	respiratory
300.3	0.139027	3.28749	3.55999	3.015	1.12465e-17	558890	2213	556677	Obsessive-compulsive disorders	mental disorders
599	0.0434851	1.45052	1.53575	1.36529	1.20138e-17	674348	47330	627018	Other symptoms/disorders or the urinary system	genitourinary
710.11	0.152823	3.66734	3.96687	3.36781	1.84614e-17	685820	1503	684317	Acute osteomyelitis	musculoskeletal
480.1	0.0905168	2.15456	2.33197	1.97714	2.25147e-17	618803	7731	611072	Bacterial pneumonia	respiratory
478	0.101418	2.35799	2.55677	2.15921	2.7173e-17	545738	4455	541283	Throat pain	respiratory
451	0.147907	3.49213	3.78202	3.20223	2.79845e-17	672131	1826	670305	Phlebitis and thrombophlebitis	circulatory system
681.1	0.107631	2.46388	2.67483	2.25292	5.3806e-17	659511	4392	655119	Cellulitis and abscess of fingers/toes	dermatologic
571	0.0657421	1.73415	1.86301	1.6053	5.57341e-17	705674	16931	688743	Chronic liver disease and cirrhosis	digestive
112	0.0725222	1.83281	1.97495	1.69067	6.59912e-17	688319	11827	676492	Candidiasis	infectious diseases
766	0.0971862	2.24372	2.43421	2.05324	9.14853e-17	701844	6903	694941	Neuralgia, neuritis, and radiculitis NOS	symptoms
626.2	0.104092	2.36629	2.57031	2.16227	1.28806e-16	656693	4273	652420	Dysmenorrhea	genitourinary
740.11	0.0593703	1.6335	1.74986	1.51713	1.39175e-16	683814	34134	649680	Osteoarthrosis, localized, primary	musculoskeletal
509	0.0527006	1.54437	1.64766	1.44108	1.62595e-16	679549	29069	650480	Respiratory failure, insufficiency, arrest	respiratory
452.2	0.0994123	2.26586	2.46071	2.07101	1.90534e-16	676465	6160	670305	Deep vein thrombosis [DVT]	circulatory system
355	0.134476	3.02038	3.28395	2.7568	2.0369e-16	696755	2124	694631	Complex regional/central pain syndrome	neurological
802	0.108329	2.43311	2.64543	2.22078	2.24802e-16	628615	3995	624620	Fracture of pelvis	injuries & poisonings
427	0.0363467	1.34589	1.41713	1.27465	3.01456e-16	683881	89206	594675	Cardiac dysrhythmias	circulatory system
496.2	0.114987	2.54473	2.77011	2.31936	4.55146e-16	636737	6528	630209	Chronic bronchitis	respiratory
916	0.0824168	1.95274	2.11428	1.7912	4.65726e-16	697313	8367	688946	Contusion	injuries & poisonings
772.2	0.0822072	1.94938	2.11051	1.78826	4.66616e-16	703284	8368	694916	Spasm of muscle	symptoms
800	0.0597276	1.6234	1.74046	1.50633	4.97194e-16	643805	19185	624620	Fracture of lower limb	injuries & poisonings
804	0.0728122	1.8044	1.94711	1.66168	5.22566e-16	635665	11045	624620	Fracture of hand or wrist	injuries & poisonings
874	0.205953	5.30182	5.70549	4.89815	5.53363e-16	669783	657	669126	Complication of amputation stump	injuries & poisonings
53	0.129843	2.8478	3.1023	2.59331	7.62312e-16	621864	3559	618305	Herpes zoster	infectious diseases
509.1	0.0613715	1.63712	1.75741	1.51683	9.58549e-16	670386	19906	650480	Respiratory failure	respiratory
710.12	0.141875	3.11633	3.3944	2.83825	1.13152e-15	686359	2042	684317	Chronic osteomyelitis	musculoskeletal
634	0.104825	2.31309	2.51854	2.10763	1.24571e-15	723241	4335	718906	Miscarriage; stillbirth	pregnancy complications
291.4	0.130758	2.82956	3.08585	2.57328	1.79746e-15	670369	2207	668162	Specific nonpsychotic mental disorders due to brain damage	mental disorders
378	0.139738	0.33147	0.605355	0.0575838	2.74262e-15	667930	14350	653580	Strabismus and other disorders of binocular eye movements	sense organs
571.5	0.0680417	1.711	1.84436	1.57763	2.94233e-15	704740	15997	688743	Other chronic nonalcoholic liver disease	digestive
681.6	0.150591	3.26774	3.5629	2.97259	3.74936e-15	657047	1928	655119	Cellulitis and abscess of foot, toe	dermatologic
765	0.0953865	2.11337	2.30033	1.92641	4.33774e-15	702009	7068	694941	Cervical radiculitis	symptoms
260.2	0.099337	2.17501	2.36971	1.98031	5.19087e-15	647321	5561	641760	severe protein-calorie malnutrition	endocrine/metabolic
172.2	0.354243	0.0628939	0.75721	-0.631422	5.76154e-15	707698	21508	686190	Other non-epithelial cancer of skin	neoplasms
578.1	0.130689	2.75522	3.01137	2.49907	8.83153e-15	672246	2330	669916	Hematemesis	digestive
427.5	0.0736292	1.76221	1.90652	1.61789	1.41628e-14	610439	15764	594675	Arrhythmia (cardiac) NOS	circulatory system
70.9	0.152003	3.19652	3.49444	2.89859	2.08943e-14	620165	1860	618305	Hepatitis NOS	infectious diseases
975	0.305128	10.2461	10.8442	9.64806	2.42181e-14	664403	128	664275	Poisoning by agents primarily acting on the smooth and skeletal muscles and respiratory system	injuries & poisonings
369.5	0.0738072	1.75552	1.90018	1.61085	2.44474e-14	653228	11399	641829	Conjunctivitis, infectious	sense organs
972.6	0.320075	11.3713	11.9986	10.7439	3.06885e-14	664388	113	664275	Antihypertensive agents causing adverse effects	injuries & poisonings
380.1	0.0935554	2.01699	2.20036	1.83363	6.41176e-14	707839	5640	702199	Otitis externa	sense organs
571.51	0.0979927	2.06996	2.26202	1.87789	1.13383e-13	695749	7006	688743	Cirrhosis of liver without mention of alcohol	digestive
276.12	0.076712	1.76571	1.91606	1.61535	1.24866e-13	632319	13657	618662	Hyposmolality and/or hyponatremia	endocrine/metabolic
495	0.0451153	1.3958	1.48422	1.30737	1.4527e-13	671216	41007	630209	Asthma	respiratory
747	0.0935291	0.501038	0.684355	0.317721	1.48103e-13	739690	19987	719703	Cardiac and circulatory congenital anomalies	congenital anomalies
792	0.0724115	1.70711	1.84904	1.56519	1.51751e-13	705174	11115	694059	Abnormal Papanicolaou smear of cervix and cervical HPV	genitourinary
803.3	0.107112	2.19575	2.40569	1.98581	2.08826e-13	628732	4112	624620	Fracture of clavicle or scapula	injuries & poisonings
351	0.0693098	1.66155	1.7974	1.5257	2.37431e-13	711824	17193	694631	Other peripheral nerve disorders	neurological
327	0.04848	1.42538	1.5204	1.33036	2.65045e-13	673900	33801	640099	Sleep disorders	neurological
614.3	0.159996	3.21939	3.53298	2.9058	2.71877e-13	710757	1515	709242	Pelvic inflammatory disease (PID)	genitourinary
41.2	0.102469	2.10726	2.3081	1.90642	3.48199e-13	694327	5154	689173	Streptococcus infection	infectious diseases
619	0.0762451	1.73809	1.88753	1.58865	4.16462e-13	726355	10750	715605	Noninflammatory female genital disorders	genitourinary
626.1	0.0583816	1.5222	1.63663	1.40777	6.16795e-13	674092	21672	652420	Irregular menstrual cycle/bleeding	genitourinary
747.1	0.0981908	0.49497	0.687424	0.302516	7.94226e-13	738033	18330	719703	Cardiac congenital anomalies	congenital anomalies
285.1	0.0693368	1.64192	1.77782	1.50602	8.58014e-13	645596	17608	627988	Acute posthemorrhagic anemia	hematopoietic
624	0.152686	2.97598	3.27524	2.67671	9.15828e-13	710039	1756	708283	Symptoms involving female genital tract	genitourinary
324	0.170456	3.36289	3.69698	3.0288	1.11876e-12	742681	1184	741497	Other CNS infection and poliomyelitis	neurological
564	0.0709756	1.65551	1.79463	1.5164	1.22428e-12	631786	12596	619190	Functional digestive disorders	digestive
303.1	0.286334	7.64049	8.2017	7.07927	1.2322e-12	556933	256	556677	Dissociative disorder	mental disorders
792.1	0.0745174	1.69684	1.8429	1.55079	1.28483e-12	704552	10493	694059	Papanicolaou smear of cervix or vagina with atypical squamous cells	genitourinary
585	0.0544607	1.46956	1.5763	1.36281	1.56496e-12	703029	40112	662917	Renal failure	genitourinary
590	0.109486	2.16547	2.38006	1.95087	1.70197e-12	627491	4613	622878	Pyelonephritis	genitourinary
671	0.210406	4.39607	4.80847	3.98368	1.95836e-12	746554	505	746049	Venous/cerebrovascular complications embolism in pregnancy and the puerperium	pregnancy complications
706	0.0581133	1.50497	1.61887	1.39107	2.00606e-12	714523	20086	694437	Diseases of sebaceous glands	dermatologic
38.1	0.133839	2.54758	2.8099	2.28525	2.80665e-12	692088	2915	689173	Gram negative septicemia	infectious diseases
280.1	0.0761008	1.69794	1.84709	1.54878	3.48212e-12	641645	13657	627988	Iron deficiency anemias, unspecified or not due to blood loss	hematopoietic
514	0.0889789	1.85662	2.03102	1.68222	3.55154e-12	732190	8961	723229	Abnormal findings examination of lungs	respiratory
989	0.243783	5.42435	5.90216	4.94653	4.03166e-12	745247	329	744918	Toxic effect of other substances, chiefly nonmedicinal as to source	injuries & poisonings
642.1	0.136727	2.56218	2.83016	2.2942	5.93016e-12	743621	2193	741428	Preeclampsia and eclampsia	pregnancy complications
594.1	0.0769709	1.69516	1.84602	1.5443	7.04037e-12	727828	11058	716770	Calculus of kidney	genitourinary
339	0.0683381	1.59611	1.73006	1.46217	7.80782e-12	698405	14416	683989	Other headache syndromes	neurological
131	0.224554	4.64269	5.08281	4.20256	8.08207e-12	729810	671	729139	Protozoan infection	infectious diseases
531	0.120972	2.26529	2.5024	2.02819	1.3851e-11	736941	4107	732834	Peptic ulcer (excl. esophageal)	digestive
577	0.0994843	1.9566	2.15159	1.76161	1.5106e-11	745226	5928	739298	Diseases of pancreas	digestive
711.1	0.165618	3.05022	3.37483	2.72561	1.6547e-11	685707	1390	684317	Pyogenic arthritis	musculoskeletal
300.8	0.192357	3.60089	3.97791	3.22387	2.73022e-11	557861	1184	556677	Acute reaction to stress	mental disorders
378.1	0.153698	0.360164	0.661412	0.0589165	3.04937e-11	665395	11815	653580	Strabismus (not specified as paralytic)	sense organs
369	0.0706198	1.59698	1.73539	1.45856	3.38832e-11	655505	13676	641829	Infection of the eye	sense organs
720.1	0.103033	1.97097	2.17291	1.76902	4.53312e-11	665941	10916	655025	Spinal stenosis of lumbar region	musculoskeletal
801.1	0.0885735	1.78642	1.96002	1.61281	5.72931e-11	632090	7470	624620	Fracture of foot	injuries & poisonings
280	0.0723678	1.60439	1.74623	1.46255	6.46796e-11	644156	16168	627988	Iron deficiency anemias	hematopoietic
415.11	0.118613	2.1682	2.40068	1.93572	6.82005e-11	694024	4597	689427	Pulmonary embolism and infarction, acute	circulatory system
199	0.142338	0.395169	0.67415	0.116187	6.89969e-11	683474	12593	670881	Neoplasm of uncertain behavior	neoplasms
594	0.07358	1.61434	1.75855	1.47012	7.57101e-11	729537	12767	716770	Urinary calculus	genitourinary
958	0.128337	2.30469	2.55623	2.05315	7.72294e-11	745242	2818	742424	Certain early complications of trauma or procedure	injuries & poisonings
458.9	0.0724175	1.59955	1.74149	1.45762	8.79436e-11	710641	16741	693900	Hypotension NOS	circulatory system
530.11	0.0382599	1.28089	1.35588	1.2059	9.7743e-11	660533	66215	594318	GERD	digestive
724	0.114795	2.09742	2.32242	1.87243	1.10063e-10	659943	4918	655025	Other and unspecified disorders of back	musculoskeletal
305.2	0.143015	2.5148	2.79511	2.23449	1.13164e-10	559438	2761	556677	Eating disorder	mental disorders
260.1	0.218541	4.08628	4.51462	3.65794	1.18653e-10	642513	753	641760	Cachexia	endocrine/metabolic
643.1	0.224209	4.23647	4.67592	3.79702	1.20084e-10	746845	593	746252	Hyperemesis gravidarum	pregnancy complications
458	0.0667916	1.53733	1.66824	1.40642	1.20536e-10	714621	20721	693900	Hypotension	circulatory system
386.9	0.0603095	1.47184	1.59004	1.35363	1.46655e-10	708257	25916	682341	Dizziness and giddiness (Light-headedness and vertigo)	sense organs
809	0.064181	1.508	1.6338	1.38221	1.54925e-10	643333	18713	624620	Fracture of unspecified bones	injuries & poisonings
707	0.102636	1.92442	2.12559	1.72326	1.79272e-10	740991	7554	733437	Chronic ulcer of skin	dermatologic
530.1	0.0374884	1.26988	1.34336	1.1964	1.85055e-10	663836	69518	594318	Esophagitis, GERD and related diseases	digestive
530	0.0369081	1.26511	1.33745	1.19277	1.87232e-10	667273	72955	594318	Diseases of esophagus	digestive
615	0.135327	2.36506	2.6303	2.09982	2.00554e-10	711655	2413	709242	Endometriosis	genitourinary
480.11	0.151736	2.62491	2.92232	2.32751	2.01707e-10	613318	2246	611072	Pneumococcal pneumonia	respiratory
509.8	0.114672	2.07335	2.29811	1.8486	2.03428e-10	654864	4384	650480	Dependence on respirator [Ventilator] or supplemental oxygen	respiratory
415.1	0.115556	2.07808	2.30457	1.85159	2.45451e-10	694665	5238	689427	Acute pulmonary heart disease	circulatory system
174	0.408972	0.0757381	0.877323	-0.725847	2.79642e-10	716663	10813	705850	Breast cancer	neoplasms
712	0.2006	3.54312	3.9363	3.14995	2.86083e-10	685095	778	684317	Infective connective tissue disorders	musculoskeletal
716	0.104497	1.93212	2.13694	1.72731	2.9236e-10	692381	8064	684317	Other arthropathies	musculoskeletal
41.9	0.131389	2.28546	2.54298	2.02794	3.15453e-10	692102	2929	689173	Infection with drug-resistant microorganisms	infectious diseases
803	0.0507162	1.37437	1.47377	1.27496	3.60983e-10	654078	29458	624620	Fracture of upper limb	injuries & poisonings
789.1	0.248935	4.69399	5.1819	4.20608	5.24535e-10	625849	409	625440	Persistent vomiting	symptoms
564.1	0.0869252	1.71546	1.88584	1.54509	5.34642e-10	627189	7999	619190	Irritable Bowel Syndrome	digestive
858	0.113954	2.02219	2.24554	1.79884	6.4298e-10	703537	4588	698949	Complication of internal orthopedic device	injuries & poisonings
726.3	0.118549	2.07478	2.30714	1.84242	7.43296e-10	626532	4594	621938	Bursitis	musculoskeletal
654	0.1416	2.38739	2.66492	2.10985	7.97248e-10	736187	2122	734065	Other and unspecified complications of birth; puerperium affecting management of mother	pregnancy complications
747.11	0.15712	0.381128	0.689084	0.0731724	8.28505e-10	729261	9558	719703	Cardiac shunt/ heart septal defect	congenital anomalies
726	0.0513795	1.37057	1.47127	1.26986	8.50262e-10	660424	38486	621938	Peripheral enthesopathies and allied syndromes	musculoskeletal
578.2	0.0850985	1.68545	1.85225	1.51866	8.54425e-10	679389	9473	669916	Blood in stool	digestive
592.11	0.120401	2.09248	2.32846	1.85649	8.6554e-10	627119	4241	622878	Acute cystitis	genitourinary
628	0.0947215	1.78472	1.97037	1.59906	9.63083e-10	658956	6536	652420	Ovarian cyst	genitourinary
741	0.056895	1.41569	1.5272	1.30417	9.97731e-10	692692	26435	666257	Symptoms and disorders of the joints	musculoskeletal
644	0.196934	3.28533	3.67132	2.89934	1.54173e-09	745919	980	744939	Anemia during pregnancy	pregnancy complications
614.54	0.223648	3.85993	4.29828	3.42158	1.54893e-09	709850	608	709242	Abscess or ulceration of vulva	genitourinary
578.8	0.0954759	1.77706	1.9642	1.58993	1.72196e-09	676630	6714	669916	Hemorrhage of rectum and anus	digestive
302	0.182518	2.98222	3.33995	2.62448	2.1426e-09	558397	1720	556677	Sexual and gender identity disorders	mental disorders
704	0.092305	1.73492	1.91584	1.55401	2.38787e-09	719456	7504	711952	Diseases of hair and hair follicles	dermatologic
800.1	0.128514	2.14077	2.39266	1.88888	3.16421e-09	629177	4557	624620	Fracture of neck of femur	injuries & poisonings
592.13	0.175271	2.82295	3.16648	2.47942	3.19963e-09	624358	1480	622878	Chronic interstitial cystitis	genitourinary
716.9	0.11161	1.93341	2.15216	1.71465	3.48361e-09	691647	7330	684317	Arthropathy NOS	musculoskeletal
174.1	0.500601	0.0526376	1.03382	-0.928541	4.06378e-09	716253	10403	705850	Breast cancer [female]	neoplasms
174.11	0.500604	0.0533369	1.03452	-0.927847	4.76497e-09	716118	10268	705850	Malignant neoplasm of female breast	neoplasms
803.2	0.0648387	1.46047	1.58755	1.33339	5.17169e-09	640984	16364	624620	Fracture of radius and ulna	injuries & poisonings
614.4	0.312338	6.15493	6.76711	5.54275	5.94737e-09	709445	203	709242	Inflammatory diseases of uterus, except cervix	genitourinary
674	0.235493	3.919	4.38056	3.45743	6.63567e-09	746517	468	746049	Other complications of the puerperium NEC	pregnancy complications
711	0.155237	2.45475	2.75902	2.15049	7.25659e-09	686199	1882	684317	Arthropathy associated with infections	musculoskeletal
577.1	0.132389	2.14934	2.40882	1.88986	7.48684e-09	742363	3065	739298	Acute pancreatitis	digestive
687.4	0.0735812	1.52999	1.67421	1.38577	7.49298e-09	658806	15695	643111	Disturbance of skin sensation	dermatologic
575	0.11235	1.9087	2.1289	1.68849	8.73395e-09	726923	4544	722379	Other biliary tract disease	digestive
288.11	0.236393	0.256713	0.720043	-0.206617	8.80486e-09	670390	7030	663360	Neutropenia	hematopoietic
614.51	0.208642	3.30759	3.71653	2.89865	9.84612e-09	710154	912	709242	Cervicitis and endocervicitis	genitourinary
291.1	0.248342	4.13502	4.62177	3.64827	1.09132e-08	668639	477	668162	Transient mental disorders due to conditions classified elsewhere	mental disorders
508	0.0538645	1.35782	1.46339	1.25224	1.35769e-08	684338	33858	650480	Pulmonary collapse; interstitial and compensatory emphysema	respiratory
994.21	0.127164	2.05821	2.30745	1.80897	1.37551e-08	733730	4066	729664	Septic shock	injuries & poisonings
733.4	0.159038	2.44714	2.75885	2.13542	1.83283e-08	651515	1962	649553	Aseptic necrosis of bone	musculoskeletal
647.3	0.297502	5.28993	5.87303	4.70683	2.1521e-08	740679	260	740419	Major puerperal infection	pregnancy complications
362	0.120079	0.513637	0.748992	0.278281	2.8842e-08	707577	20406	687171	Other retinal disorders	sense organs
303.3	0.246934	3.92923	4.41322	3.44524	2.99492e-08	557410	733	556677	Psychogenic disorder	mental disorders
496.1	0.138976	2.1535	2.42589	1.88111	3.39748e-08	635059	4850	630209	Emphysema	respiratory
345	0.0510405	1.32402	1.42406	1.22398	3.8202e-08	670409	29004	641405	Epilepsy, recurrent seizures, convulsions	neurological
80	0.102821	1.75794	1.95947	1.55641	4.09698e-08	734220	5699	728521	Postoperative infection	infectious diseases
626.11	0.109359	1.82043	2.03478	1.60609	4.30029e-08	657215	4795	652420	Absent or infrequent menstruation	genitourinary
715.1	0.148637	2.24883	2.54015	1.9575	4.97272e-08	693921	2751	691170	Sacroiliitis NEC	musculoskeletal
567	0.125194	1.97781	2.22319	1.73243	5.10893e-08	699745	3595	696150	Peritonitis and retroperitoneal infections	digestive
579.2	0.133582	2.0688	2.33062	1.80698	5.26551e-08	672823	2907	669916	Splenomegaly	digestive
292.2	0.180295	2.66552	3.0189	2.31214	5.39633e-08	670848	2686	668162	Mild cognitive impairment	mental disorders
830	0.0657024	1.42884	1.55761	1.30006	5.58901e-08	718468	17090	701378	Dislocation	injuries & poisonings
261.2	0.107106	1.78573	1.99566	1.5758	6.17821e-08	648751	6991	641760	Vitamin B-complex deficiencies	endocrine/metabolic
740.9	0.0740997	1.49093	1.63616	1.34569	7.04607e-08	675394	25714	649680	Osteoarthrosis NOS	musculoskeletal
530.7	0.367685	7.21255	7.93321	6.49189	7.71415e-08	594469	151	594318	Gastroesophageal laceration-hemorrhage syndrome	digestive
260	0.0706802	1.46201	1.60054	1.32347	7.71615e-08	657948	16188	641760	Protein-calorie malnutrition	endocrine/metabolic
733.6	0.203929	2.96562	3.36532	2.56592	9.78281e-08	650457	904	649553	Costochondritis	musculoskeletal
173	0.0980788	0.600827	0.793061	0.408593	2.05519e-07	706462	20272	686190	Neoplasm of uncertain behavior of skin	neoplasms
798.1	0.128373	1.94727	2.19888	1.69566	2.08777e-07	591980	4236	587744	Chronic fatigue syndrome	symptoms
707.3	0.195976	2.75506	3.13917	2.37095	2.32544e-07	734849	1412	733437	Chronic ulcer of unspecified site	dermatologic
368	0.0875389	0.636977	0.808553	0.465401	2.57387e-07	717899	18509	699390	Visual disturbances	sense organs
367.8	0.250771	0.276416	0.767928	-0.215095	2.935e-07	697403	4829	692574	Hypermetropia	sense organs
575.8	0.145152	2.10397	2.38847	1.81947	2.98364e-07	724726	2347	722379	Other disorders of biliary tract	digestive
966	0.309989	4.89234	5.49991	4.28476	3.02788e-07	664514	239	664275	Poisoning by anticonvulsants and anti-Parkinsonism drugs	injuries & poisonings
357	0.109899	1.75515	1.97055	1.53975	3.07459e-07	721004	6924	714080	Inflammatory and toxic neuropathy	neurological
596	0.115709	0.553194	0.779983	0.326404	3.10947e-07	716903	12244	704659	Other disorders of bladder	genitourinary
340.1	0.106875	1.72369	1.93316	1.51422	3.49768e-07	688887	4898	683989	Migrain with aura	neurological
195	0.707372	0.0272975	1.41375	-1.35915	3.56896e-07	679439	8558	670881	Cancer, suspected or other	neoplasms
626.12	0.0894389	1.56933	1.74463	1.39403	4.68934e-07	661370	8950	652420	Excessive or frequent menstruation	genitourinary
501	0.131257	1.93054	2.1878	1.67328	5.39912e-07	654073	3593	650480	Pneumonitis due to inhalation of food or vomitus	respiratory
751	0.126616	0.532001	0.78017	0.283833	6.21492e-07	728748	12177	716571	Genitourinary congenital anomalies	congenital anomalies
578.9	0.120917	1.82603	2.06302	1.58903	6.36518e-07	676231	6315	669916	Hemorrhage of gastrointestinal tract	digestive
715	0.130305	1.90968	2.16507	1.65428	6.87847e-07	695164	3994	691170	Other inflammatory spondylopathies	musculoskeletal
593	0.0777477	1.46759	1.61998	1.31521	8.0475e-07	638527	15649	622878	Hematuria	genitourinary
634.1	0.155315	2.14543	2.44985	1.84101	8.88776e-07	720942	2036	718906	Missed abortion/Hydatidiform mole	pregnancy complications
704.8	0.149748	2.08739	2.3809	1.79388	8.90748e-07	714382	2430	711952	Other specified diseases of hair and hair follicles	dermatologic
741.4	0.0966618	1.60656	1.79602	1.41711	9.35722e-07	674085	7828	666257	Joint effusions	musculoskeletal
574	0.0897576	1.55203	1.72796	1.37611	9.71884e-07	732097	9718	722379	Cholelithiasis and cholecystitis	digestive
348.7	0.212306	2.81184	3.22796	2.39572	1.11845e-06	642432	1027	641405	Coma	neurological
742	0.0979577	1.6073	1.7993	1.41531	1.26916e-06	672700	6443	666257	Derangement of joint, non-traumatic	musculoskeletal
562	0.103239	1.64765	1.84999	1.4453	1.3195e-06	631048	11858	619190	Diverticulosis and diverticulitis	digestive
260.3	0.167406	2.24716	2.57528	1.91905	1.32102e-06	644901	3141	641760	Adult failure to thrive	endocrine/metabolic
367	0.0689005	0.717427	0.852472	0.582382	1.43728e-06	720081	27507	692574	Disorders of refraction and accommodation; blindness and low vision	sense organs
531.4	0.217018	2.84324	3.2686	2.41789	1.47188e-06	734042	1208	732834	Peptic ulcer, site unspecified	digestive
521	0.0873793	1.52253	1.69379	1.35126	1.50272e-06	707730	9255	698475	Diseases of hard tissues of teeth	digestive
840.2	0.137184	1.9318	2.20068	1.66292	1.58856e-06	659502	4640	654862	Rotator cuff (capsule) sprain	injuries & poisonings
724.8	0.199664	2.60401	2.99535	2.21267	1.6405e-06	656322	1297	655025	Other symptoms referable to back	musculoskeletal
707.2	0.146794	2.01941	2.30713	1.73169	1.68708e-06	737345	3908	733437	Chronic ulcer of leg or foot	dermatologic
345.3	0.0562246	1.30869	1.41889	1.19849	1.71066e-06	665467	24062	641405	Convulsions	neurological
521.1	0.0880147	1.51789	1.6904	1.34538	2.12158e-06	707627	9152	698475	Dental caries	digestive
705.3	0.212184	2.72712	3.143	2.31124	2.26525e-06	695401	964	694437	Hidradenitis	dermatologic
599.2	0.102142	1.61966	1.81985	1.41946	2.34668e-06	635985	8967	627018	Retention of urine	genitourinary
536.3	0.16076	2.13104	2.44613	1.81595	2.52044e-06	703874	2012	701862	Gastroparesis	digestive
705	0.174199	2.26705	2.60848	1.92562	2.62037e-06	696260	1823	694437	Disorders of sweat glands	dermatologic
289.5	0.212094	2.68473	3.10043	2.26902	3.21897e-06	664299	939	663360	Diseases of spleen	hematopoietic
345.12	0.15008	0.498685	0.792842	0.204528	3.55111e-06	649469	8064	641405	Partial epilepsy	neurological
564.9	0.240339	3.04535	3.51642	2.57429	3.59495e-06	619884	694	619190	Personal history of diseases of digestive system	digestive
686.3	0.207497	2.60839	3.01509	2.2017	3.8287e-06	656126	1007	655119	Pilonidal cyst	dermatologic
379	0.111953	0.598808	0.818235	0.379381	4.63558e-06	674026	20446	653580	Other disorders of eye	sense organs
797	0.122317	1.75073	1.99047	1.51099	4.68287e-06	743981	4965	739016	Shock	symptoms
180.3	0.108931	1.64202	1.85553	1.42852	5.29666e-06	699058	4999	694059	Cervical intraepithelial neoplasia [CIN] [Cervical dysplasia]	neoplasms
368.1	0.201294	0.402856	0.797392	0.0083189	6.2823e-06	706485	7095	699390	Amblyopia	sense organs
707.1	0.143624	1.90658	2.18808	1.62508	7.02052e-06	737017	3580	733437	Decubitus ulcer	dermatologic
952	0.247153	3.03486	3.51928	2.55044	7.0622e-06	748879	609	748270	Spinal cord injury without evidence of spinal bone injury	injuries & poisonings
669	0.192525	2.36975	2.7471	1.99241	7.4145e-06	747260	1067	746193	Complications of labor and delivery NEC	pregnancy complications
350.3	0.159034	0.491392	0.803099	0.179684	7.90745e-06	704781	7603	697178	Lack of coordination	neurological
637	0.294756	3.72688	4.3046	3.14916	8.07259e-06	718014	744	717270	Short gestation; low birth weight; and fetal growth retardation	pregnancy complications
365	0.128674	0.56346	0.815661	0.311259	8.2638e-06	709096	18652	690444	Glaucoma	sense organs
389.1	0.102328	0.634926	0.835489	0.434362	9.03274e-06	696338	18789	677549	Sensorineural hearing loss	sense organs
191	0.500487	0.108712	1.08967	-0.872244	9.25891e-06	739891	3264	736627	Manlignant and unknown neoplasms of brain and nervous system	neoplasms
571.8	0.123276	1.72591	1.96753	1.48429	9.55175e-06	693639	4896	688743	Liver abscess and sequelae of chronic liver disease	digestive
842	0.176613	2.18483	2.53099	1.83867	9.63726e-06	656601	1739	654862	Other sprains and strains	injuries & poisonings
451.2	0.227529	2.72832	3.17428	2.28236	1.02782e-05	671395	1090	670305	Phlebitis and thrombophlebitis of lower extremities	circulatory system
288.1	0.151732	0.513894	0.811289	0.2165	1.14614e-05	672271	8911	663360	Decreased white blood cell count	hematopoietic
306.9	0.226526	2.69417	3.13816	2.25018	1.21342e-05	557876	1199	556677	Tension headache	mental disorders
117	0.148036	1.90638	2.19653	1.61622	1.31007e-05	679285	2793	676492	Mycoses	infectious diseases
635.3	0.212218	2.52059	2.93653	2.10464	1.32262e-05	719886	980	718906	Placenta previa and abruptio placenta	pregnancy complications
870.3	0.134473	1.79061	2.05418	1.52705	1.47654e-05	672461	3335	669126	Other open wound of head and face	injuries & poisonings
531.3	0.246974	2.9056	3.38967	2.42153	1.56857e-05	733630	796	732834	Duodenal ulcer	digestive
264	0.116006	0.606734	0.834105	0.379364	1.65304e-05	659786	18026	641760	Lack of normal physiological development	endocrine/metabolic
800.3	0.0970992	1.51875	1.70907	1.32844	1.67934e-05	631857	7237	624620	Fracture of tibia and fibula	injuries & poisonings
596.5	0.120587	0.596178	0.832529	0.359827	1.79363e-05	714758	10099	704659	Functional disorders of bladder	genitourinary
560.4	0.116583	1.64364	1.87215	1.41514	2.02302e-05	624229	5039	619190	Other intestinal obstruction	digestive
216	0.0948794	0.669	0.854964	0.483036	2.26874e-05	712348	15489	696859	Benign neoplasm of skin	neoplasms
528.3	0.221815	2.55829	2.99305	2.12353	2.28778e-05	721814	859	720955	Cellulitis and abscess of oral soft tissues	digestive
961.1	0.166992	2.0265	2.35381	1.6992	2.34085e-05	666742	2467	664275	Poisoning/allergy of sulfonamides	injuries & poisonings
539	0.114438	1.62068	1.84498	1.39638	2.45054e-05	748066	5020	743046	Bariatric surgery	digestive
614.31	0.388722	5.14292	5.90482	4.38103	2.52189e-05	709409	167	709242	Acute inflammatory pelvic disease	genitourinary
172.1	0.707525	0.0513149	1.43806	-1.33543	2.6998e-05	691124	4934	686190	Melanomas of skin, dx or hx	neoplasms
536	0.101673	1.5283	1.72758	1.32902	3.02279e-05	708455	6593	701862	Disorders of function of stomach	digestive
702.1	0.149344	0.537519	0.830233	0.244805	3.22752e-05	718659	15754	702905	Actinic keratosis	dermatologic
961	0.307848	3.58389	4.18728	2.98051	3.37794e-05	664645	370	664275	Poisoning by other anti-infectives	injuries & poisonings
574.1	0.100706	1.51764	1.71502	1.32025	3.43874e-05	730222	7843	722379	Cholelithiasis	digestive
472	0.112432	0.628374	0.848741	0.408006	3.5893e-05	555050	13767	541283	Chronic pharyngitis and nasopharyngitis	respiratory
457	0.136123	1.75475	2.02155	1.48795	3.61175e-05	676076	5771	670305	Encounter for long-term (current) use of anticoagulants, antithrombotics, aspirin	circulatory system
290.3	0.169423	2.01331	2.34538	1.68125	3.6214e-05	671903	3741	668162	Other persistent mental disorders due to conditions classified elsewhere	mental disorders
281.12	0.179864	2.09858	2.45112	1.74605	3.76862e-05	630488	2500	627988	Other vitamin B12 deficiency anemia	hematopoietic
573.6	0.176634	2.06803	2.41423	1.72183	3.89589e-05	690413	1670	688743	Nonspecific elevation of levels of transaminase or lactic acid dehydrogenase [LDH]	digestive
506	0.0980313	1.49249	1.68463	1.30035	4.40968e-05	658222	7742	650480	Empyema and pneumothorax	respiratory
475.9	0.133441	1.72417	1.98572	1.46263	4.45906e-05	545396	4113	541283	Postnasal drip	respiratory
835	0.0873657	1.42736	1.5986	1.25613	4.64369e-05	710821	9443	701378	Internal derangement of knee	injuries & poisonings
281	0.14397	1.7956	2.07778	1.51342	4.78891e-05	632360	4372	627988	Other deficiency anemia	hematopoietic
531.2	0.21182	2.36057	2.77573	1.9454	5.0163e-05	734126	1292	732834	Gastric ulcer	digestive
963.1	0.408899	0.190527	0.991968	-0.610914	5.01977e-05	667537	3262	664275	Antineoplastic and immunosuppressive drugs causing adverse effects	injuries & poisonings
601.11	0.272802	3.01779	3.55248	2.4831	5.14778e-05	709869	638	709231	Acute prostatitis	genitourinary
457.3	0.146865	1.80813	2.09599	1.52028	5.50902e-05	675060	4755	670305	Encounter for long-term (current) use of aspirin	circulatory system
411.2	0.0923182	1.44832	1.62926	1.26738	6.0141e-05	671175	16737	654438	Myocardial infarction	circulatory system
509.3	0.100322	1.49497	1.6916	1.29833	6.12078e-05	657875	7395	650480	Pulmonary insufficiency or respiratory failure following trauma and surgery	respiratory
705.8	0.18532	2.1007	2.46392	1.73747	6.19304e-05	695915	1478	694437	Hyperhidrosis	dermatologic
741.2	0.0884039	1.42281	1.59609	1.24954	6.63715e-05	676622	10365	666257	Stiffness of joint	musculoskeletal
349	0.171562	1.982	2.31827	1.64574	6.6768e-05	643448	2043	641405	Other and unspecified disorders of the nervous system	neurological
800.2	0.125002	1.64519	1.89019	1.40018	6.81147e-05	628657	4037	624620	Fracture of unspecified part of femur	injuries & poisonings
396	0.112911	0.638465	0.85977	0.41716	7.07246e-05	678232	11762	666470	Abnormal heart sounds	circulatory system
907	0.154676	1.84739	2.15056	1.54423	7.24379e-05	744971	2359	742612	Injuries to the nervous system	injuries & poisonings
204	1.0002	0.0189845	1.97937	-1.9414	7.39056e-05	736852	5658	731194	Leukemia	neoplasms
455	0.119765	1.60282	1.83756	1.36808	8.17904e-05	676057	5752	670305	Hemorrhoids	circulatory system
250.6	0.112894	1.55804	1.77931	1.33677	8.57104e-05	652795	8727	644068	Polyneuropathy in diabetes	endocrine/metabolic
572	0.104835	1.50862	1.71409	1.30314	8.77146e-05	695675	6932	688743	Ascites (non malignant)	digestive
507	0.0672411	1.30142	1.43322	1.16963	8.92384e-05	673094	22614	650480	Pleurisy; pleural effusion	respiratory
870.5	0.227153	2.43086	2.87608	1.98564	9.21644e-05	670001	875	669126	Open wound of lip and mouth	injuries & poisonings
726.1	0.0734324	1.33114	1.47507	1.18722	9.8087e-05	640867	18929	621938	Enthesopathy	musculoskeletal
379.2	0.14316	0.572686	0.85328	0.292092	9.87397e-05	669868	16288	653580	Disorders of vitreous body	sense organs
562.1	0.11819	1.58263	1.81429	1.35098	0.000102607	629203	10013	619190	Diverticulosis	digestive
175	0.578036	0.105919	1.23887	-1.02703	0.000102756	695950	3105	692845	Acquired absence of breast	neoplasms
395.3	0.195441	2.13036	2.51343	1.7473	0.000108985	668411	1941	666470	Nonrheumatic tricuspid valve disorders	circulatory system
153	0.334246	0.274672	0.929793	-0.380449	0.000110655	703470	4995	698475	Colorectal cancer	neoplasms
575.7	0.221655	2.35181	2.78626	1.91737	0.000114235	723361	982	722379	Other disorders of gallbladder	digestive
817	0.154746	1.81218	2.11548	1.50888	0.000122051	720320	2223	718097	Concussion	injuries & poisonings
279.1	0.177753	0.505309	0.853705	0.156913	0.000122997	730548	6894	723654	Immunity deficiency	endocrine/metabolic
871.2	0.144892	1.7439	2.02789	1.45991	0.000123938	672082	2956	669126	Open wound of finger(s)	injuries & poisonings
433.3	0.108376	1.51496	1.72738	1.30255	0.000126649	702709	10434	692275	Cerebral ischemia	circulatory system
244.1	0.159366	0.544001	0.856359	0.231643	0.000133365	672529	8059	664470	Secondary hypothyroidism	endocrine/metabolic
433.31	0.111504	1.53003	1.74858	1.31149	0.000136668	702134	9859	692275	Transient cerebral ischemia	circulatory system
279	0.157177	0.549527	0.857593	0.241461	0.000139489	731675	8021	723654	Disorders involving the immune mechanism	endocrine/metabolic
555.1	0.109627	1.51697	1.73184	1.30211	0.000143978	624274	5084	619190	Regional enteritis	digestive
327.1	0.154719	1.79906	2.10231	1.49581	0.000147228	642398	2299	640099	Hypersomnia	neurological
202	1.00023	0.022462	1.98291	-1.93798	0.000147603	736420	5226	731194	Cancer of other lymphoid, histiocytic tissue	neoplasms
276.13	0.094249	1.42808	1.61281	1.24335	0.000156369	631386	12724	618662	Hyperpotassemia	endocrine/metabolic
636.8	0.246518	2.53915	3.02232	2.05597	0.000156852	719652	746	718906	Cervical incompetence	pregnancy complications
795	0.272357	2.79399	3.32781	2.26017	0.00016161	749126	495	748631	Other and nonspecific abnormal cytological, histological and immunological findings	symptoms
257	0.134095	1.65799	1.92081	1.39516	0.000162912	696453	4346	692107	Testicular dysfunction	endocrine/metabolic
251.1	0.131052	1.63584	1.8927	1.37898	0.000173046	610940	3503	607437	Hypoglycemia	endocrine/metabolic
367.2	0.151779	0.565729	0.863214	0.268243	0.000174657	699561	6987	692574	Astigmatism	sense organs
286.81	0.162523	1.83952	2.15807	1.52098	0.000176642	683412	2033	681379	Primary hypercoagulable state	hematopoietic
704.1	0.128978	1.62088	1.87368	1.36808	0.000180694	716082	4130	711952	Alopecia	dermatologic
732.1	0.179535	1.95781	2.3097	1.60592	0.000182539	651291	1738	649553	Juvenile osteochondrosis	musculoskeletal
281.1	0.167289	1.86108	2.18897	1.53319	0.000204748	631268	3280	627988	Megaloblastic anemia	hematopoietic
550.1	0.136309	0.603661	0.870827	0.336495	0.000213125	708934	8566	700368	Inguinal hernia	digestive
860	0.50064	0.157617	1.13887	-0.823637	0.000223851	749235	2496	746739	Bone marrow or stem cell transplant	neoplasms
257.1	0.13524	1.64659	1.91166	1.38152	0.000226418	696413	4306	692107	Testicular hypofunction	endocrine/metabolic
871.3	0.216183	2.21506	2.63878	1.79134	0.000234411	670215	1089	669126	Open wound of foot except toe(s) alone	injuries & poisonings
702	0.100651	0.690751	0.888027	0.493475	0.000237085	694838	24086	670752	Degenerative skin conditions and other dermatoses	dermatologic
375.1	0.0751583	1.31747	1.46478	1.17016	0.000244031	678219	24639	653580	Dry eyes	sense organs
941	0.322556	3.23411	3.86632	2.6019	0.000273795	625167	335	624832	Adverse reaction to serum or vaccine	injuries & poisonings
558	0.0799989	1.33577	1.49256	1.17897	0.000295909	631163	11973	619190	Noninfectious gastroenteritis	digestive
286.8	0.158462	1.77321	2.0838	1.46263	0.000300693	683611	2232	681379	Hypercoagulable state	hematopoietic
356	0.111769	1.49634	1.71541	1.27727	0.000311159	722329	8249	714080	Hereditary and idiopathic peripheral neuropathy	neurological
626.4	0.27244	2.66842	3.2024	2.13444	0.000315078	652878	458	652420	Premenstrual tension syndromes	genitourinary
41.4	0.123083	1.55573	1.79697	1.31449	0.000329881	694326	5153	689173	E. coli	infectious diseases
758	0.268402	0.382344	0.908413	-0.143725	0.000340889	731673	3735	727938	Chromosomal anomalies and genetic disorders	congenital anomalies
871.1	0.168908	1.82939	2.16045	1.49833	0.000349172	671304	2178	669126	Open wound of hand except finger(s)	injuries & poisonings
225	0.289603	0.355819	0.92344	-0.211802	0.000359574	740076	3449	736627	Benign neoplasm of brain and other parts of nervous system	neoplasms
276.6	0.110625	1.48374	1.70057	1.26692	0.000361491	627877	9215	618662	Fluid overload	endocrine/metabolic
180	0.106454	1.46182	1.67047	1.25317	0.000361578	699964	5905	694059	Cervical cancer and dysplasia	neoplasms
742.2	0.199054	2.01533	2.40547	1.62518	0.000430632	667379	1122	666257	Pathological, developmental or recurrent dislocation	musculoskeletal
608	0.147014	1.67401	1.96215	1.38586	0.000457377	691931	3006	688925	Other disorders of male genital organs	genitourinary
555	0.098378	1.41066	1.60348	1.21784	0.000470035	626172	6982	619190	Inflammatory bowel disease and other gastroenteritis and colitis	digestive
556	0.253941	2.41815	2.91588	1.92043	0.000506671	619990	800	619190	Ulceration of the lower GI tract	digestive
586	0.0809419	0.754969	0.913615	0.596323	0.000515431	685875	22958	662917	Other disorders of the kidney and ureters	genitourinary
442.8	0.282043	2.65312	3.20592	2.10032	0.000541112	694483	664	693819	Aneurysm of other specified artery	circulatory system
250.21	0.23942	2.28485	2.75411	1.81559	0.000557977	644863	795	644068	Type 2 diabetes with ketoacidosis	endocrine/metabolic
536.8	0.143421	1.64045	1.92156	1.35935	0.000558141	705132	3270	701862	Dyspepsia and other specified disorders of function of stomach	digestive
714.1	0.100647	1.41341	1.61068	1.21614	0.000586384	701001	9831	691170	Rheumatoid arthritis	musculoskeletal
260.22	0.227183	2.1811	2.62638	1.73583	0.000597788	642541	781	641760	Nutritional marasmus	endocrine/metabolic
263	0.169003	1.78508	2.11632	1.45383	0.000606471	644068	2308	641760	Other nutritional deficiency	endocrine/metabolic
987	0.418633	4.18017	5.00069	3.35965	0.000633809	745067	149	744918	Toxic effect of other gases, fumes, or vapors	injuries & poisonings
791	0.253523	2.37173	2.86863	1.87483	0.00065806	748957	1041	747916	Gangrene	symptoms
742.9	0.117971	1.49352	1.72475	1.2623	0.000673107	671180	4923	666257	Other derangement of joint	musculoskeletal
520.2	0.124962	1.52769	1.77262	1.28277	0.000696122	702671	4196	698475	Disturbances in tooth eruption	digestive
573.3	0.198889	1.96111	2.35093	1.57129	0.000708265	689999	1256	688743	Hepatomegaly	digestive
465.4	0.22616	2.14792	2.5912	1.70465	0.00072391	521452	1399	520053	Acute laryngitis and tracheitis	respiratory
613.1	0.21183	2.04607	2.46125	1.63088	0.000725679	726213	1188	725025	Inflammatory disease of breast	genitourinary
384.4	0.214256	0.484801	0.904744	0.0648591	0.000726953	632459	4292	628167	Perforation of tympanic membrane	sense organs
686.2	0.191431	1.9089	2.2841	1.5337	0.000731902	656932	1813	655119	Impetigo	dermatologic
740.12	0.23936	2.24073	2.70987	1.77158	0.000749897	650712	1032	649680	Osteoarthrosis, localized, secondary	musculoskeletal
70.4	0.220919	2.09881	2.53181	1.66581	0.000791229	619586	1281	618305	Chronic hepatitis	infectious diseases
313.3	0.210509	0.493541	0.906138	0.0809443	0.000795124	690686	6151	684535	Autism	mental disorders
562.2	0.171579	1.77517	2.11147	1.43888	0.000823409	622377	3187	619190	Diverticulitis	digestive
752	0.236818	0.452908	0.917072	-0.0112554	0.000823971	739082	3716	735366	Nervous system congenital anomalies	congenital anomalies
561	0.0716992	1.27078	1.41131	1.13025	0.000831384	634768	15578	619190	Symptoms involving digestive system	digestive
153.2	0.7077	0.0939317	1.48102	-1.29316	0.000831539	702107	3632	698475	Colon cancer	neoplasms
241.2	0.157659	0.590464	0.899476	0.281452	0.000832734	673021	8551	664470	Nontoxic multinodular goiter	endocrine/metabolic
261	0.0586972	1.21656	1.33161	1.10152	0.000838712	672890	31130	641760	Vitamin deficiency	endocrine/metabolic
204.1	1.0003	0.035471	1.99606	-1.92512	0.000843721	733706	2512	731194	Lymphoid leukemia	neoplasms
286.4	0.339643	3.09824	3.76394	2.43254	0.000870068	681728	349	681379	Acquired coagulation factor deficiency	hematopoietic
520	0.123109	1.50449	1.74579	1.2632	0.000907181	702854	4379	698475	Disorders of tooth development	digestive
90	0.198672	1.92989	2.31929	1.54049	0.000935356	747010	1749	745261	Sexually transmitted infections (not HIV or hepatitis)	infectious diseases
836	0.246194	2.25752	2.74005	1.77498	0.000941602	702251	873	701378	Traumatic arthropathy	injuries & poisonings
327.71	0.140864	1.59246	1.86855	1.31636	0.000956488	644337	4238	640099	Restless legs syndrome	neurological
526.4	0.185205	1.84339	2.2064	1.48039	0.00095884	700031	1556	698475	Temporomandibular joint disorders	digestive
305.21	0.281225	2.52639	3.07759	1.97519	0.000982271	557353	676	556677	Anorexia nervosa	mental disorders
292.3	0.128287	1.52588	1.77732	1.27443	0.000987936	675865	7703	668162	Memory loss	mental disorders
225.1	0.28966	0.386248	0.953982	-0.181485	0.00102305	739845	3218	736627	Benign neoplasm of brain, cranial nerves, meninges	neoplasms
242	0.11741	1.46862	1.69874	1.23849	0.00106299	670051	5581	664470	Thyrotoxicosis with or without goiter	endocrine/metabolic
840.1	0.359676	3.24286	3.94783	2.5379	0.00107212	655264	402	654862	Muscle/tendon sprain	injuries & poisonings
751.2	0.21924	0.489008	0.918719	0.0592981	0.00110247	720303	3732	716571	Congenital anomalies of urinary system	congenital anomalies
597	0.201037	0.519278	0.91331	0.125246	0.00111536	709465	4806	704659	Other disorders of urethra and urinary tract	genitourinary
870.8	0.416806	3.8815	4.69844	3.06456	0.00113855	669301	175	669126	Open wound of genital organs	injuries & poisonings
289.4	0.0824098	1.30653	1.46805	1.145	0.00117685	675503	12143	663360	Lymphadenitis	hematopoietic
742.1	0.321989	2.83536	3.46646	2.20426	0.00120939	666613	356	666257	Loose body in joint	musculoskeletal
343	0.243708	0.454392	0.932059	-0.0232751	0.00120944	645144	3739	641405	Infantile cerebral palsy	neurological
360	0.448023	0.235152	1.11328	-0.642973	0.00123395	692573	2129	690444	Disorders of the globe	sense organs
513	0.125118	0.667751	0.912983	0.42252	0.00124804	728318	9003	719315	Respiratory abnormalities	respiratory
717	0.28158	2.47776	3.02966	1.92586	0.00127135	748192	1384	746808	Polymyalgia Rheumatica	musculoskeletal
41.21	0.385687	3.46296	4.21891	2.70701	0.00127948	689380	207	689173	Rheumatic fever / chorea	infectious diseases
420.21	0.271312	2.39547	2.92724	1.86369	0.00128269	720012	636	719376	Acute pericarditis	circulatory system
389.2	0.109791	0.702232	0.917422	0.487042	0.00128333	688118	10569	677549	Conductive hearing loss	sense organs
425.8	0.360286	3.18868	3.89485	2.48252	0.0012883	719791	415	719376	Other cardiomyopathy	circulatory system
703.1	0.151029	1.62493	1.92095	1.32891	0.00130728	715032	3080	711952	Ingrowing nail	dermatologic
654.2	0.32215	2.8102	3.44161	2.17879	0.0013395	734394	329	734065	Rhesus isoimmunization in pregnancy	pregnancy complications
374.6	0.131245	1.52325	1.78049	1.26601	0.00134333	651442	9613	641829	Dermatochalasis	sense organs
695.42	0.143683	1.58481	1.86643	1.30319	0.00135199	676261	3482	672779	Systemic lupus erythematosus	dermatologic
649.1	0.126296	1.49807	1.74561	1.25053	0.0013732	728745	4549	724196	Diabetes or abnormal glucose tolerance complicating pregnancy	pregnancy complications
184	0.578207	0.157203	1.29049	-0.976082	0.00137467	718061	2177	715884	Cancer of other female genital organs	neoplasms
788	0.0660122	1.23442	1.3638	1.10503	0.0014213	726233	22751	703482	Syncope and collapse	symptoms
758.1	0.302753	0.381207	0.974603	-0.212189	0.00144514	731081	3143	727938	Chromosomal anomalies	congenital anomalies
384	0.197215	0.535308	0.921849	0.148767	0.00153126	632762	4595	628167	Other disorders of tympanic membrane	sense organs
333.2	0.246037	2.1783	2.66053	1.69607	0.0015543	642255	850	641405	Myoclonus	neurological
604	0.176315	0.572653	0.91823	0.227077	0.00156787	695692	6767	688925	Disorders of penis	genitourinary
350	0.0695997	0.802648	0.939064	0.666233	0.0015852	725143	27965	697178	Abnormal movement	neurological
475	0.0720421	1.25398	1.39519	1.11278	0.00168035	560199	18916	541283	Chronic sinusitis	respiratory
362.3	0.379029	0.304733	1.04763	-0.438165	0.00171757	691137	3966	687171	Other nondiabetic retinopathy	sense organs
913	0.221196	1.99836	2.4319	1.56481	0.00174853	725634	1001	724633	Toxic effect of venom	injuries & poisonings
526	0.122093	1.46495	1.70425	1.22565	0.00176423	702868	4393	698475	Diseases of the jaws	digestive
614.53	0.32145	2.7283	3.35834	2.09826	0.00179416	709664	422	709242	Cyst or abscess of Bartholin's gland	genitourinary
721.2	0.202702	1.87659	2.27389	1.4793	0.00190064	657267	2242	655025	Spondylosis with myelopathy	musculoskeletal
286.2	0.0851837	1.3008	1.46776	1.13384	0.00202063	700731	19352	681379	Encounter for long-term (current) use of anticoagulants	hematopoietic
381.2	0.0642816	1.21902	1.34501	1.09302	0.00206392	648505	20338	628167	Eustachian tube disorders	sense organs
345.1	0.0984271	0.738485	0.931402	0.545568	0.00207011	654242	12837	641405	Epilepsy	neurological
550.5	0.151087	1.59139	1.88752	1.29526	0.00210445	703482	3114	700368	Ventral hernia	digestive
595	0.141096	0.64921	0.925757	0.372662	0.00220047	723983	7213	716770	Hydronephrosis	genitourinary
597.1	0.409314	0.286493	1.08875	-0.515762	0.00225815	706617	1958	704659	Urethral stricture (not specified as infectious)	genitourinary
963	0.259191	0.453257	0.961272	-0.0547569	0.00226609	667683	3408	664275	Poisoning by primarily systemic agents	injuries & poisonings
912	0.166437	1.66099	1.9872	1.33477	0.00229845	726917	2284	724633	Insect bite	injuries & poisonings
550.2	0.117437	1.4304	1.66058	1.20022	0.00230331	707928	7560	700368	Diaphragmatic hernia	digestive
315	0.100449	0.737381	0.934261	0.540501	0.00242227	700924	16389	684535	Develomental delays and disorders	mental disorders
656.8	0.202957	1.84973	2.24753	1.45193	0.00244241	728647	7493	721154	Perinatal jaundice	pregnancy complications
286.12	0.306789	2.53118	3.13249	1.92988	0.00246895	681756	377	681379	Congenital deficiency of other clotting factors (including factor VII)	hematopoietic
949	0.1309	1.48542	1.74198	1.22885	0.00250374	628809	3977	624832	Allergies, other	injuries & poisonings
495.2	0.086854	1.29921	1.46944	1.12897	0.00258074	642882	12673	630209	Asthma with exacerbation	respiratory
353	0.18809	1.76136	2.13002	1.3927	0.00261537	696493	1862	694631	Nerve root and plexus disorders	neurological
110.13	0.173607	1.68476	2.02503	1.34449	0.00265913	678816	2324	676492	Dermatophytosis of the body	infectious diseases
749	0.190943	0.56359	0.937839	0.189342	0.00267214	738573	7005	731568	Congenital anomalies of face and neck	congenital anomalies
728.7	0.122306	1.44344	1.68316	1.20372	0.00269156	628002	6064	621938	Fasciitis	musculoskeletal
573.7	0.160116	1.61483	1.92865	1.301	0.00276234	691419	2676	688743	Abnormal results of function study of liver	digestive
286.3	0.271726	2.25371	2.78629	1.72113	0.00278585	681909	530	681379	Coagulation defects complicating pregnancy or postpartum	hematopoietic
331.1	0.19721	0.554904	0.941436	0.168372	0.00282232	645581	4176	641405	Hydrocephalus	neurological
938.2	0.268702	0.448757	0.975413	-0.0778984	0.00286359	630452	5620	624832	Chronic dermatitis due to solar radiation	dermatologic
626.13	0.0949032	1.32596	1.51197	1.13995	0.00295006	661079	8659	652420	Irregular menstrual cycle	genitourinary
818.2	0.206749	1.84362	2.24885	1.43839	0.00308822	719463	1366	718097	Subarachnoid hemorrhage (injury)	injuries & poisonings
972.1	0.511788	4.50617	5.50927	3.50306	0.00326582	664423	148	664275	Cardiac rhythm regulators causing adverse effects in therapeutic use	injuries & poisonings
695.4	0.140835	1.51248	1.78851	1.23644	0.00330532	676605	3826	672779	Lupus (localized and systemic)	dermatologic
568	0.146228	1.53335	1.81996	1.24675	0.00346427	699542	3392	696150	Other disorders of peritoneum	digestive
747.13	0.225219	0.518022	0.959452	0.0765929	0.00349548	724735	5032	719703	Congenital anomalies of great vessels	congenital anomalies
279.7	0.15289	1.56118	1.86085	1.26152	0.00357414	726417	2763	723654	Other immunological findings	endocrine/metabolic
361	0.289762	0.430869	0.998802	-0.137064	0.0036647	693951	3507	690444	Retinal detachments and defects	sense organs
529.1	0.385231	3.06134	3.81639	2.30629	0.00367993	721197	242	720955	Glossitis	digestive
261.1	0.457603	3.76186	4.65876	2.86496	0.00378751	641913	153	641760	Vitamin A deficiency	endocrine/metabolic
610.1	0.161711	0.626418	0.943371	0.309464	0.00382269	706710	6660	700050	Cystic mastopathy	genitourinary
264.9	0.176203	0.600912	0.94627	0.255555	0.00384689	649203	7443	641760	Lack of normal physiological development, unspecified	endocrine/metabolic
348.8	0.110121	1.37459	1.59042	1.15875	0.00386326	648055	6650	641405	Encephalopathy, not elsewhere classified	neurological
964.1	0.383986	3.01535	3.76796	2.26274	0.00404839	664635	360	664275	Anticoagulants causing adverse effects	injuries & poisonings
411	0.0599852	1.18769	1.30527	1.07012	0.00413591	711964	57526	654438	Ischemic Heart Disease	circulatory system
949.1	0.307261	2.4063	3.00853	1.80407	0.00426583	626357	1525	624832	Diaper or napkin rash	injuries & poisonings
365.1	0.147635	0.656225	0.94559	0.36686	0.00432645	703353	12909	690444	Open-angle glaucoma	sense organs
696.41	0.129876	1.44728	1.70183	1.19272	0.00442097	667568	4421	663147	Psoriasis vulgaris	dermatologic
528.12	0.261819	2.10287	2.61604	1.5897	0.00452561	721619	664	720955	Oral aphthae	digestive
250.14	0.179134	1.66039	2.01149	1.30929	0.00464629	646464	2396	644068	Type 1 diabetes with neurological manifestations	endocrine/metabolic
362.29	0.257523	2.0691	2.57385	1.56436	0.0047503	690570	3399	687171	Macular degeneration (senile) of retina NOS	sense organs
610	0.141665	0.670476	0.948139	0.392814	0.0047736	708091	8041	700050	Benign mammary dysplasias	genitourinary
727.1	0.0927681	1.29925	1.48107	1.11742	0.00477379	633561	11623	621938	Synovitis and tenosynovitis	musculoskeletal
530.12	0.321122	2.45887	3.08827	1.82947	0.00508283	594843	525	594318	Ulcer of esophagus	digestive
264.1	0.205967	0.561729	0.965425	0.158032	0.00510813	646695	4935	641760	Short stature	endocrine/metabolic
601.1	0.233077	1.91968	2.37651	1.46284	0.00514159	710614	1383	709231	Prostatitis	genitourinary
315.3	0.251112	0.495702	0.98788	0.00352296	0.00519479	687673	3138	684535	Mental retardation	mental disorders
586.3	0.359421	2.7301	3.43456	2.02564	0.0052008	663240	323	662917	Vascular disorders of kidney/hypertrophy	genitourinary
252	0.268493	0.472468	0.998714	-0.0537774	0.0052291	696168	4061	692107	Disorders of parathyroid gland	endocrine/metabolic
360.2	0.70783	0.139152	1.5265	-1.24819	0.00533229	691775	1331	690444	Progressive myopia	sense organs
526.41	0.245902	1.98095	2.46291	1.49898	0.0054382	699345	870	698475	Temporomandibular joint disorder, unspecified	digestive
870.6	0.383842	2.90354	3.65587	2.15121	0.00548629	669414	288	669126	Open wound of neck	injuries & poisonings
379.3	0.707853	0.140695	1.52809	-1.2467	0.00559562	654906	1326	653580	Aphakia and other disorders of lens	sense organs
211	0.578252	0.201554	1.33493	-0.93182	0.00560741	731118	1769	729349	Benign neoplasm of other parts of digestive system	neoplasms
771	0.154366	1.53229	1.83484	1.22973	0.00569932	705966	3482	702484	Musculoskeletal symptoms referable to limbs	symptoms
750	0.214599	0.552934	0.973548	0.132321	0.00576176	720733	4162	716571	Digestive congenital anomalies	congenital anomalies
378.2	0.578304	0.202732	1.33621	-0.930744	0.00578771	654968	1388	653580	Nystagmus and other irregular eye movements	sense organs
938	0.230897	0.529411	0.981969	0.0768543	0.00587936	630861	6029	624832	Dermatitis due to solar radiation	dermatologic
524.3	0.126767	1.41679	1.66526	1.16833	0.00599013	703077	4602	698475	Anomalies of tooth position/malocclusion	digestive
751.12	0.212317	0.557973	0.974114	0.141832	0.00599619	723108	6537	716571	Congenital anomalies of male genital organs	congenital anomalies
281.11	0.281441	2.1663	2.71793	1.61468	0.00602064	629071	1083	627988	Pernicious anemia	hematopoietic
875	0.281083	2.16188	2.7128	1.61096	0.0060902	669905	779	669126	Non-healing surgical wound	injuries & poisonings
735.23	0.245912	1.96193	2.44391	1.47994	0.00613416	680613	1150	679463	Hallux rigidus	musculoskeletal
331	0.167786	0.631413	0.960274	0.302552	0.00613715	646823	5418	641405	Other cerebral degenerations	neurological
470	0.0772746	1.23583	1.38729	1.08437	0.0061413	556926	15643	541283	Septal Deviations/Turbinate Hypertrophy	respiratory
228.1	0.236834	0.523947	0.988142	0.0597525	0.00634906	738917	3099	735818	Hemangioma of skin and subcutaneous tissue	neoplasms
516	0.171085	1.59469	1.93002	1.25937	0.00637633	746044	2642	743402	Abnormal sputum	respiratory
656.5	0.389352	2.89005	3.65318	2.12692	0.00641566	723356	2202	721154	Hematological disorders of newborn	pregnancy complications
738.4	0.133312	1.43793	1.69922	1.17664	0.00644004	685159	5696	679463	Acquired spondylolisthesis	musculoskeletal
569	0.0882351	1.27079	1.44373	1.09785	0.00660972	706491	10341	696150	Other disorders of intestine	digestive
716.1	0.456202	3.44525	4.33941	2.5511	0.00669775	684500	183	684317	Unspecified polyarthropathy or polyarthritis	musculoskeletal
611.11	0.379356	0.357499	1.10104	-0.386038	0.00669807	702737	2687	700050	Mammographic microcalcification	genitourinary
565	0.10638	1.3338	1.54231	1.12529	0.0067779	703002	6852	696150	Anal and rectal conditions	digestive
743.11	0.104941	1.32818	1.53386	1.12249	0.00684208	706452	13617	692835	Osteoporosis NOS	musculoskeletal
255.21	0.154435	1.51816	1.82085	1.21547	0.0068635	694930	2823	692107	Glucocorticoid deficiency	endocrine/metabolic
740.2	0.113631	1.35941	1.58213	1.1367	0.00688831	662196	12516	649680	Osteoarthrosis, generalized	musculoskeletal
752.2	0.317485	0.424608	1.04688	-0.197662	0.00697473	737796	2430	735366	Other specified congenital anomalies of nervous system	congenital anomalies
327.72	0.511146	3.96502	4.96686	2.96317	0.00704006	640281	182	640099	Sleep related leg cramps	neurological
277.1	0.512854	3.97605	4.98125	2.97086	0.0071155	731465	106	731359	Disorders of porphyrin metabolism	endocrine/metabolic
755	0.193789	0.594458	0.974284	0.214631	0.00727739	732720	4794	727926	Congenital anomalies of limbs	congenital anomalies
870.2	0.383916	2.80156	3.55403	2.04908	0.00728912	669395	269	669126	Open wound of ear	injuries & poisonings
315.2	0.182563	0.613136	0.970961	0.255312	0.0073745	694110	9575	684535	Speech and language disorder	mental disorders
250.1	0.0896906	0.786598	0.962391	0.610804	0.00744411	659986	15918	644068	Type 1 diabetes	endocrine/metabolic
364	0.259384	0.500777	1.00917	-0.00761457	0.00766917	694542	4098	690444	Corneal opacity and other disorders of cornea	sense organs
153.3	0.379068	0.364346	1.10732	-0.378627	0.00773287	701014	2539	698475	Malignant neoplasm of rectum, rectosigmoid junction, and anus	neoplasms
110	0.088128	1.2642	1.43693	1.09146	0.00780994	690655	14163	676492	Dermatophytosis / Dermatomycosis	infectious diseases
722.7	0.261476	2.00428	2.51678	1.49179	0.00783545	656155	1130	655025	Intervertebral disc disorder with myelopathy	musculoskeletal
594.8	0.321096	2.34827	2.97762	1.71892	0.00784571	717197	427	716770	Renal colic	genitourinary
371.2	0.101508	1.30918	1.50814	1.11023	0.00795437	653571	11742	641829	Conjunctivitis, noninfectious	sense organs
696	0.114912	1.35558	1.58081	1.13035	0.00810918	669100	5953	663147	Psoriasis and related disorders	dermatologic
79.9	0.156684	1.5128	1.8199	1.2057	0.00824138	622476	4171	618305	Viremia, NOS	infectious diseases
282.9	0.221326	1.79112	2.22492	1.35732	0.00845327	629571	1583	627988	Other hereditary hemolytic anemias	hematopoietic
753	0.379128	0.369829	1.11292	-0.373263	0.0086983	737215	1849	735366	Congenital anomalies of the eye	congenital anomalies
364.1	0.40931	0.341849	1.1441	-0.460398	0.00873046	692451	2007	690444	Corneal opacity	sense organs
656	0.138689	1.43825	1.71008	1.16642	0.00878122	736343	15189	721154	Other perinatal conditions of fetus or newborn	pregnancy complications
353.2	0.292619	2.15066	2.72419	1.57712	0.00887155	695412	781	694631	Nerve root lesions	neurological
747.12	0.161426	0.656406	0.9728	0.340012	0.00911104	725049	5346	719703	Valvular heart disease/ heart chambers	congenital anomalies
524	0.12481	1.38463	1.62926	1.14	0.00912235	703289	4814	698475	Dentofacial anomalies, including malocclusion	digestive
732	0.158327	1.50999	1.82031	1.19967	0.0092448	652311	2758	649553	Osteochondropathies	musculoskeletal
327.41	0.162168	1.52516	1.84301	1.20731	0.00924529	642877	2778	640099	Organic or persistent insomnia	neurological
689	0.12115	1.37052	1.60797	1.13306	0.0092781	729618	5628	723990	Disorder of skin and subcutaneous tissue NOS	dermatologic
729.3	0.359415	2.53917	3.24362	1.83472	0.00952387	622282	344	621938	Panniculitis	musculoskeletal
859	0.139098	1.43288	1.70551	1.16024	0.00971461	702760	3811	698949	Complication due to other implant and internal device	injuries & poisonings
537	0.149316	1.47106	1.76372	1.1784	0.00973705	705482	3620	701862	Other disorders of stomach and duodenum	digestive
705.1	0.30526	2.19707	2.79538	1.59876	0.00992171	695198	761	694437	Dyshidrosis	dermatologic
344	0.149319	1.46704	1.75971	1.17438	0.0102692	644618	3213	641405	Other paralytic syndromes	neurological
742.8	0.338559	2.38071	3.04428	1.71713	0.0104065	666610	353	666257	Articular cartilage disorder	musculoskeletal
696.4	0.120428	1.35749	1.59353	1.12146	0.0111504	668659	5512	663147	Psoriasis	dermatologic
388	0.578404	0.23043	1.3641	-0.903242	0.0111588	678843	1294	677549	Other disorders of ear	sense organs
750.1	0.409537	0.354468	1.15716	-0.448224	0.0113263	718407	1836	716571	Upper gastrointestinal congenital anomalies	congenital anomalies
228	0.186833	0.624653	0.990847	0.25846	0.0117822	739959	4141	735818	Hemangioma and lymphangioma, any site	neoplasms
252.1	0.302823	0.467403	1.06094	-0.126131	0.0120195	695644	3537	692107	Hyperparathyroidism	endocrine/metabolic
79.1	0.454296	3.11547	4.00589	2.22505	0.01237	618488	183	618305	Varicella infection	infectious diseases
250.11	0.162204	1.49918	1.8171	1.18125	0.0125487	646394	2326	644068	Type 1 diabetes with ketoacidosis	endocrine/metabolic
250.5	0.338596	2.32483	2.98848	1.66119	0.0127165	644411	343	644068	Glycosuria or Acetonuria	endocrine/metabolic
559	0.215876	1.71055	2.13367	1.28743	0.0128944	620499	1309	619190	Ileostomy status	digestive
964	0.383222	2.59026	3.34137	1.83914	0.0130075	664668	393	664275	Poisoning by agents primarily affecting blood constituents	injuries & poisonings
726.2	0.238676	1.8086	2.2764	1.34079	0.0130404	623200	1262	621938	Synoviopathy	musculoskeletal
371.21	0.105694	1.29986	1.50702	1.0927	0.0130918	652863	11034	641829	Allergic conjunctivitis	sense organs
250.24	0.113608	1.32362	1.54629	1.10095	0.0135908	654773	10705	644068	Type 2 diabetes with neurological manifestations	endocrine/metabolic
444	0.202451	1.64711	2.04391	1.25031	0.0137047	695608	1789	693819	Arterial embolism and thrombosis	circulatory system
603.2	0.305863	2.12423	2.72372	1.52474	0.0137693	689462	537	688925	Spermatocele	genitourinary
415.2	0.151956	0.688222	0.986055	0.390388	0.0139364	697088	7661	689427	Chronic pulmonary heart disease	circulatory system
756.21	0.281452	1.99736	2.54901	1.44572	0.0139686	728521	595	727926	Pectus excavatum	congenital anomalies
110.1	0.0926583	1.25557	1.43718	1.07396	0.0140405	689669	13177	676492	Dermatophytosis	infectious diseases
375	0.334516	0.440064	1.09572	-0.215588	0.0141357	655514	1934	653580	Disorders of lacrimal system	sense organs
325	0.359265	2.41349	3.11765	1.70934	0.014189	741786	289	741497	Phlebitis and thrombophlebitis of intracranial venous sinuses	neurological
414	0.108814	1.30539	1.51866	1.09211	0.0143211	664536	10098	654438	Other forms of chronic heart disease	circulatory system
290.1	0.206575	1.65765	2.06254	1.25277	0.0144219	675254	7092	668162	Dementias	mental disorders
428.2	0.175509	0.651429	0.995427	0.307431	0.0146077	690300	7616	682684	Heart failure NOS	circulatory system
611.3	0.12385	0.739053	0.9818	0.496306	0.0146248	709777	9727	700050	Lump or mass in breast	genitourinary
385	0.243695	0.551979	1.02962	0.0743378	0.014749	630989	2822	628167	Other disorders of middle ear and mastoid	sense organs
727	0.0685629	1.18194	1.31632	1.04756	0.0147681	644661	22723	621938	Other disorders of synovium, tendon, and bursa	musculoskeletal
364.4	0.57833	0.244217	1.37774	-0.889309	0.0147878	691848	1404	690444	Corneal degenerations	sense organs
513.3	0.201216	0.612478	1.00686	0.218094	0.0148345	723108	3793	719315	Hypoventilation	respiratory
110.2	0.238415	1.7872	2.2545	1.31991	0.0148727	677588	1096	676492	Dermatomycoses	infectious diseases
459	0.14048	1.4073	1.68264	1.13196	0.0150083	698645	4745	693900	Other disorders of circulatory system	circulatory system
275	0.10124	0.782894	0.981323	0.584464	0.0156227	732476	14194	718282	Disorders of mineral metabolism	endocrine/metabolic
53.1	0.35841	2.36423	3.06671	1.66175	0.0163614	619004	699	618305	Herpes zoster with nervous system complications	infectious diseases
327.7	0.132093	1.37295	1.63185	1.11405	0.0164158	645311	5212	640099	Sleep related movement disorders	neurological
516.1	0.176095	1.52497	1.87012	1.17983	0.016561	746004	2602	743402	Hemoptysis	respiratory
724.1	0.232302	1.74248	2.1978	1.28717	0.0168269	656353	1328	655025	Disorders of sacrum	musculoskeletal
279.11	0.448391	0.342554	1.2214	-0.536293	0.0168819	724889	1235	723654	Deficiency of humoral immunity	endocrine/metabolic
440.9	0.305375	2.06428	2.66281	1.46574	0.0176248	695279	1460	693819	Atherosclerosis of aorta	circulatory system
379.5	0.334555	0.45245	1.10818	-0.203277	0.0177616	655940	2360	653580	Disorders of iris and ciliary body	sense organs
528.11	0.578391	0.256283	1.38993	-0.877363	0.0185776	722039	1084	720955	Stomatitis and mucositis (ulcerative)	digestive
182	1.00082	0.0950083	2.05661	-1.8666	0.0186796	707469	1504	705965	Malignant neoplasm of uterus	neoplasms
751.3	0.501347	0.307688	1.29033	-0.674952	0.0187226	718098	1527	716571	Obstructive genitourinary defect	congenital anomalies
346.1	0.270604	1.88826	2.41865	1.35788	0.0188226	642329	924	641405	Nonspecific abnormal findings on radiological and other examination of skull and head	neurological
958.2	0.280854	1.93411	2.48458	1.38363	0.0188383	743134	710	742424	Traumatic and surgical subcutaneous emphysema	injuries & poisonings
577.3	0.232208	1.7251	2.18023	1.26998	0.0188606	740775	1477	739298	Cyst and pseudocyst of pancreas	digestive
196	0.113786	0.766687	0.989708	0.543666	0.0195497	682082	11201	670881	Radiotherapy	neoplasms
727.6	0.166609	1.4713	1.79785	1.14475	0.0204668	625946	4008	621938	Rupture of tendon, nontraumatic	musculoskeletal
556.1	0.305483	2.02987	2.62862	1.43113	0.0204736	619835	645	619190	Ulceration of intestine	digestive
275.1	0.708055	0.195225	1.58301	-1.19256	0.0210452	719434	1152	718282	Disorders of iron metabolism	hematopoietic
459.7	0.414765	2.59268	3.40562	1.77974	0.0216219	694189	289	693900	Blood vessel replaced	circulatory system
302.1	0.304377	2.0097	2.60628	1.41312	0.0218389	557667	990	556677	Decreased libido	mental disorders
771.2	0.320407	2.07977	2.70776	1.45177	0.0222899	703278	794	702484	Cramp of limb	symptoms
385.3	0.278538	0.529679	1.07561	-0.0162561	0.0225189	630420	2253	628167	Cholesteatoma	sense organs
701.5	0.280954	1.89724	2.44791	1.34657	0.0226442	702392	615	701777	Abnormal granulation tissue	dermatologic
585.2	0.171117	1.47607	1.81146	1.14068	0.0228752	666396	3479	662917	Renal failure NOS	genitourinary
790.6	0.13905	1.37157	1.64411	1.09903	0.023071	740112	4713	735399	Other abnormal blood chemistry	symptoms
110.12	0.220638	1.64958	2.08203	1.21713	0.0232983	678335	1843	676492	Althete's foot	infectious diseases
293.1	0.129161	0.746125	0.99928	0.49297	0.0233643	727700	8143	719557	Swelling, mass, or lump in head and neck [Space-occupying lesion, intracranial NOS]	mental disorders
736.2	0.245512	1.74042	2.22163	1.25922	0.024006	680459	996	679463	Acquired deformities of finger	musculoskeletal
244.5	0.708218	0.202302	1.59041	-1.18581	0.024048	665489	1019	664470	Congenital hypothyroidism	endocrine/metabolic
262	0.211152	1.60906	2.02292	1.1952	0.0242815	643223	1463	641760	Mineral deficiency NEC	endocrine/metabolic
751.21	0.302711	0.505759	1.09907	-0.0875542	0.0243242	718579	2008	716571	Cystic kidney disease	congenital anomalies
327.32	0.0607804	0.872504	0.991634	0.753375	0.0248362	675428	35329	640099	Obstructive sleep apnea	neurological
427.6	0.1781	0.670866	1.01994	0.32179	0.0250033	600311	5636	594675	Premature beats	circulatory system
429.1	0.236919	0.589076	1.05344	0.124715	0.0255045	685502	2818	682684	Heart transplant/surgery	circulatory system
573	0.120293	1.3066	1.54237	1.07082	0.0262067	695331	6588	688743	Other disorders of liver	digestive
870.4	0.454517	2.74589	3.63675	1.85504	0.0262581	669340	214	669126	Open wound of nose and sinus	injuries & poisonings
755.1	0.317535	0.493887	1.11626	-0.12848	0.0263076	729897	1971	727926	Congenital deformities of feet	congenital anomalies
368.91	0.320353	2.03688	2.66477	1.40898	0.0263693	699939	549	699390	Psychophysical visual disturbances	sense organs
747.2	0.354802	0.455014	1.15043	-0.240398	0.0264638	721191	1488	719703	Congenital anomalies of peripheral vascular system	congenital anomalies
530.15	0.448579	0.370412	1.24963	-0.508802	0.0268308	595514	1196	594318	Eosinophilic esophagitis	digestive
756.2	0.253413	1.74809	2.24478	1.2514	0.0275239	728798	872	727926	Pectus and other congenital anomalies of ribs/sternum	congenital anomalies
599.5	0.0846679	1.20507	1.37102	1.03912	0.0275809	643721	16703	627018	Frequency of urination and polyuria	genitourinary
513.32	0.414006	2.48858	3.30003	1.67713	0.0276532	719675	360	719315	Orthopnea	respiratory
420.1	0.383365	2.32081	3.0722	1.56941	0.0280834	719676	300	719376	Myocarditis	circulatory system
605	0.120619	1.30305	1.53946	1.06664	0.0281939	698275	9350	688925	Erectile dysfunction [ED]	genitourinary
427.9	0.0592717	1.13886	1.25503	1.02269	0.028254	625099	30424	594675	Palpitations	circulatory system
528.1	0.219371	0.618107	1.04807	0.188139	0.0283034	724156	3201	720955	Stomatitis and mucositis	digestive
480.5	0.245114	1.71127	2.19169	1.23084	0.0283957	612173	1101	611072	Bronchopneumonia and lung abscess	respiratory
420.2	0.147583	1.38179	1.67105	1.09253	0.0284394	723276	3900	719376	Pericarditis	circulatory system
281.9	0.292098	1.89413	2.46664	1.32162	0.0287565	628937	949	627988	Deficiency anemias	hematopoietic
443.1	0.198752	1.54401	1.93356	1.15445	0.0288488	695503	1684	693819	Raynaud's syndrome	circulatory system
752.1	0.354869	0.460808	1.15635	-0.234736	0.0290161	736827	1461	735366	Neural tube defects	congenital anomalies
427.42	0.20233	1.5551	1.95166	1.15853	0.02909	596852	2177	594675	Cardiac arrest	circulatory system
187	1.00086	0.11282	2.07451	-1.84887	0.0292512	736904	840	736064	Cancer of other male genital organs	neoplasms
81	0.116243	1.28833	1.51617	1.06049	0.0292976	734652	6131	728521	Infection/inflammation of internal prosthetic device; implant; and graft	infectious diseases
327.3	0.0560691	0.885053	0.994948	0.775157	0.0294197	680812	40713	640099	Sleep apnea	neurological
255.2	0.147631	1.37918	1.66853	1.08982	0.0294334	695482	3375	692107	Adrenal hypofunction	endocrine/metabolic
818	0.156109	1.40401	1.70999	1.09804	0.0297274	721204	3107	718097	Intracranial hemorrhage (injury)	injuries & poisonings
531.5	0.455037	2.68801	3.57988	1.79613	0.0297796	733035	201	732834	Gastrojejunal ulcer	digestive
379.1	0.238575	1.67735	2.14496	1.20975	0.0301631	654852	1272	653580	Scleritis and episcleritis	sense organs
656.3	0.315838	1.98149	2.60053	1.36245	0.0303732	723741	2587	721154	Endocrine and metabolic disturbances of fetus and newborn	pregnancy complications
284	0.157392	0.711492	1.01998	0.403003	0.0305651	634089	6101	627988	Aplastic anemia	hematopoietic
427.3	0.0844391	1.20019	1.36569	1.03469	0.0306878	610332	15657	594675	Other specified cardiac dysrhythmias	circulatory system
212	0.40949	0.412898	1.2155	-0.389701	0.030762	748075	1542	746533	Benign neoplasm of respiratory and intrathoracic organs	neoplasms
199.4	0.708251	0.216646	1.60482	-1.17153	0.0308087	671668	787	670881	Neurofibromatosis	neoplasms
427.61	0.578527	0.287678	1.42159	-0.846234	0.0312717	595774	1099	594675	Supraventricular premature beats	circulatory system
250.4	0.0943045	1.22425	1.40908	1.03941	0.0319159	656383	12315	644068	Abnormal glucose	endocrine/metabolic
931	0.215703	1.58739	2.01017	1.16461	0.0321728	626135	1303	624832	Contact dermatitis and other eczema due to plants [except food]	dermatologic
686.4	0.337324	2.05958	2.72074	1.39843	0.032204	655575	456	655119	Pyogenic granuloma	dermatologic
272.11	0.0736785	0.854078	0.998488	0.709668	0.0322877	633006	37098	595908	Hypercholesterolemia	endocrine/metabolic
731	0.382606	2.26625	3.01615	1.51634	0.0324927	650059	506	649553	Osteitis deformans and osteopathies associated with other disorders classified elsewhere	musculoskeletal
853	0.261312	1.74746	2.25963	1.23528	0.0326802	699842	893	698949	Complication of colostomy or enterostomy	injuries & poisonings
158	1.00081	0.118772	2.08037	-1.84282	0.0332693	722451	1144	721307	Neoplasm of unspecified nature of digestive system	neoplasms
213	0.278633	0.552782	1.0989	0.00666238	0.0333784	640918	1992	638926	Benign neoplasm of bone and articular cartilage	neoplasms
394	0.127915	1.31275	1.56346	1.06204	0.0333892	673589	7119	666470	Rheumatic disease of the heart valves	circulatory system
394.7	0.158152	1.39842	1.70839	1.08844	0.0339745	670437	3967	666470	Disease of tricuspid valve	circulatory system
625.1	0.198669	1.52151	1.9109	1.13212	0.0346377	709900	1617	708283	Dyspareunia	genitourinary
526.5	0.35827	2.13119	2.8334	1.42898	0.0346828	698907	432	698475	Inflammatory conditions of jaw	digestive
250.3	0.0826538	1.19073	1.35273	1.02873	0.0346829	659660	15592	644068	Insulin pump user	endocrine/metabolic
965.3	0.50863	2.92694	3.92386	1.93003	0.0347319	664411	136	664275	Salicylates causing adverse effects in therapeutic use	injuries & poisonings
244.4	0.0533918	1.11913	1.22378	1.01448	0.0350316	703367	38897	664470	Hypothyroidism NOS	endocrine/metabolic
568.1	0.17881	1.4574	1.80786	1.10693	0.0351664	698526	2376	696150	Peritoneal adhesions (postoperative) (postinfection)	digestive
702.2	0.111765	0.790443	1.0095	0.571385	0.0353716	719832	16927	702905	Seborrheic keratosis	dermatologic
345.11	0.147156	0.73418	1.02261	0.445753	0.0357448	647180	5775	641405	Generalized convulsive epilepsy	neurological
8.52	0.166249	1.41693	1.74278	1.09108	0.0360639	724650	2921	721729	Intestinal infection due to C. difficile	infectious diseases
253.2	0.334621	0.496323	1.15218	-0.159534	0.0363043	693677	1570	692107	Pituitary hypofunction	endocrine/metabolic
721.8	0.587369	3.39929	4.55054	2.24805	0.0372392	655207	182	655025	Other allied disorders of spine	musculoskeletal
377.1	0.448502	0.395484	1.27455	-0.48358	0.0386102	654947	1367	653580	Optic atrophy	sense organs
560	0.100123	1.22978	1.42602	1.03354	0.0388473	628134	8944	619190	Intestinal obstruction without mention of hernia	digestive
535.8	0.302756	0.535403	1.12881	-0.0579983	0.0390658	703743	1881	701862	Other specified gastritis	digestive
751.22	0.409602	0.429789	1.23261	-0.373031	0.0392399	717807	1236	716571	Other specified congenital anomalies of kidney	congenital anomalies
627.2	0.093597	1.2126	1.39605	1.02915	0.0394414	665953	13533	652420	Symptomatic menopause	genitourinary
348.2	0.16342	0.714676	1.03498	0.394372	0.0398209	646574	5169	641405	Cerebral edema and compression of brain	neurological
523.3	0.26101	1.70862	2.22019	1.19704	0.0401354	699609	1134	698475	Periodontitis (acute or chronic)	digestive
320	0.184591	1.45943	1.82123	1.09764	0.0405562	743466	1969	741497	Meningitis	neurological
378.5	0.379309	0.460115	1.20356	-0.283331	0.0407014	654951	1371	653580	Paralytic strabismus	sense organs
172.3	0.708449	0.234645	1.62321	-1.15391	0.0407295	687801	1611	686190	Carcinoma in situ of skin	neoplasms
81.1	1.0009	0.129096	2.09085	-1.83266	0.0408185	729268	747	728521	Graft-versus-host disease	infectious diseases
264.3	0.211048	0.650001	1.06365	0.236347	0.0412352	647843	6083	641760	Delayed milestones	endocrine/metabolic
752.11	0.409647	0.434285	1.23719	-0.368624	0.0417474	736565	1199	735366	Spina bifida	congenital anomalies
782	0.270288	1.73361	2.26337	1.20384	0.0417882	690429	1019	689410	Symptoms involving skin and other integumentary tissue	symptoms
840.3	0.110001	1.25042	1.46602	1.03482	0.0421922	661957	7095	654862	Joint/ligament sprain	injuries & poisonings
8.5	0.156034	1.37225	1.67808	1.06643	0.0425481	725100	3371	721729	Bacterial enteritis	infectious diseases
361.1	0.379317	0.464002	1.20746	-0.279459	0.0429353	692270	1826	690444	Retinal detachment with retinal defect	sense organs
443	0.119356	1.27215	1.50608	1.03821	0.0437276	704612	10793	693819	Peripheral vascular disease	circulatory system
270.11	0.454669	2.50152	3.39267	1.61037	0.0437343	728723	176	728547	Disturbances of sulphur-bearing amino-acid metabolism	endocrine/metabolic
250.42	0.106642	1.23974	1.44876	1.03072	0.0438854	653507	9439	644068	Other abnormal glucose	endocrine/metabolic
365.11	0.279751	0.569435	1.11775	0.0211225	0.044125	696670	6226	690444	Primary open angle glaucoma	sense organs
601	0.15864	1.37576	1.6867	1.06483	0.0443357	712537	3306	709231	Inflammatory diseases of prostate	genitourinary
750.13	0.448783	0.405579	1.28519	-0.474036	0.0443403	718066	1495	716571	Congenital anomalies of mouth/tongue	congenital anomalies
272.13	0.0596091	0.887223	1.00406	0.77039	0.0447085	650189	54281	595908	Mixed hyperlipidemia	endocrine/metabolic
531.1	0.357851	2.04842	2.74981	1.34703	0.045089	733443	609	732834	Hemorrhage from gastrointestinal ulcer	digestive
626.14	0.195136	1.47727	1.85974	1.09481	0.0455413	654294	1874	652420	Irregular menstrual bleeding	genitourinary
450	0.243808	0.614775	1.09264	0.136911	0.0459978	747348	3309	744039	Noninfectious disorders of lymphatic channels	circulatory system
796	0.449247	0.408301	1.28882	-0.472223	0.0461634	711692	2461	709231	Elevated prostate specific antigen [PSA]	genitourinary
525.1	0.252745	1.65255	2.14793	1.15717	0.0468718	699667	1192	698475	Loss of teeth or edentulism	digestive
385.5	0.448517	0.411474	1.29057	-0.467618	0.0477171	629242	1075	628167	Tympanosclerosis and middle ear disease related to otitis media	sense organs
569.2	0.118653	1.26435	1.49691	1.03179	0.0480613	701950	5800	696150	Gastrointestinal complications	digestive
287.3	0.0845965	1.18189	1.3477	1.01608	0.0482142	694287	12908	681379	Thrombocytopenia	hematopoietic
603.1	0.334964	0.516696	1.17323	-0.139834	0.0486949	690560	1635	688925	Hydrocele	genitourinary
411.1	0.119884	1.26651	1.50148	1.03153	0.0487517	665294	10856	654438	Unstable angina (intermediate coronary syndrome)	circulatory system
587	0.219493	0.649179	1.07939	0.218972	0.0490239	667031	4114	662917	Kidney replaced by transpant	genitourinary
726.4	0.280599	1.73676	2.28673	1.18678	0.0491504	622905	967	621938	Calcaneal spur; Exostosis NOS	musculoskeletal
187.2	1.00103	0.139767	2.10178	-1.82225	0.0493264	736699	635	736064	Malignant neoplasm of testis	neoplasms
751.1	0.161177	0.728783	1.04469	0.412876	0.0496549	724192	7621	716571	Congenital anomalies of genital organs	congenital anomalies
367.1	0.0789584	0.856509	1.01127	0.70175	0.0498	709943	17369	692574	Myopia	sense organs
505	0.334586	0.519001	1.17479	-0.136788	0.0499746	652474	1994	650480	Other pulmonary inflamation or edema	respiratory
253	0.145528	0.751968	1.0372	0.466734	0.0501343	697698	5591	692107	Disorders of the pituitary gland and its hypothalamic control	endocrine/metabolic
714	0.0882515	1.18743	1.3604	1.01446	0.0515827	704636	13466	691170	Rheumatoid arthritis and other inflammatory polyarthropathies	musculoskeletal
442	0.13705	1.30525	1.57387	1.03663	0.0519209	700747	6928	693819	Other aneurysm	circulatory system
446.8	0.508143	2.6726	3.66856	1.67664	0.0530399	693981	162	693819	Thrombotic microangiopathy	circulatory system
536.7	0.194571	1.45632	1.83768	1.07496	0.0533595	703579	1717	701862	Complications of gastrostomy, colostomy and enterostomy	digestive
593.1	0.191146	1.44369	1.81833	1.06904	0.0547265	625795	2917	622878	Gross hematuria	genitourinary
368.3	0.501439	0.381982	1.3648	-0.600839	0.0549542	700410	1020	699390	Anisometropia	sense organs
442.2	0.586219	3.0722	4.22119	1.92321	0.0555391	694053	234	693819	Aneurysm of iliac artery	circulatory system
727.7	0.35487	0.507039	1.20259	-0.188507	0.05564	623424	1486	621938	Contracture of tendon (sheath)	musculoskeletal
241	0.10893	0.812664	1.02617	0.599161	0.0568676	676998	12528	664470	Nontoxic nodular goiter	endocrine/metabolic
275.3	0.175271	0.716432	1.05996	0.372901	0.057092	723101	4819	718282	Disorders of magnesium metabolism	endocrine/metabolic
414.2	0.305248	1.78711	2.38539	1.18882	0.0571633	655860	1422	654438	ASCVD	circulatory system
592.2	0.382154	2.05869	2.80771	1.30966	0.0588289	623316	438	622878	Urethritis and urethral syndrome	genitourinary
286.9	0.304875	1.77783	2.37539	1.18028	0.0591186	682174	795	681379	Abnormal coagulation profile	hematopoietic
634.3	0.357737	1.9641	2.66527	1.26294	0.0591653	719374	468	718906	Ectopic pregnancy	pregnancy complications
277.7	0.191036	1.43334	1.80777	1.05891	0.0594981	733521	2162	731359	Dysmetabolic syndrome X	endocrine/metabolic
751.11	0.253511	1.61172	2.1086	1.11484	0.0597311	717467	896	716571	Congenital anomalies of female genital organs	congenital anomalies
261.4	0.0652575	1.13068	1.25859	1.00278	0.0598213	668215	26455	641760	Vitamin D deficiency	endocrine/metabolic
749.1	0.449239	0.42968	1.31019	-0.450828	0.0600642	648831	1439	647392	Cleft palate	congenital anomalies
350.2	0.0946075	0.837271	1.0227	0.65184	0.060475	713494	16316	697178	Abnormality of gait	neurological
530.14	0.141777	1.30386	1.58175	1.02598	0.0612805	598023	3705	594318	Reflux esophagitis	digestive
695.3	0.193852	0.695946	1.0759	0.315996	0.0614982	682751	4434	678317	Rosacea	dermatologic
287	0.0818635	1.16511	1.32556	1.00465	0.0619479	695203	13824	681379	Purpura and other hemorrhagic conditions	hematopoietic
571.81	0.168628	1.36864	1.69916	1.03813	0.0627408	692032	3289	688743	Portal hypertension	digestive
656.7	0.325822	1.83107	2.46968	1.19246	0.0633766	723463	2309	721154	Conditions involving the integument and temperature regulation of fetus and newborn	pregnancy complications
272.9	0.454134	2.32304	3.21314	1.43293	0.0634526	596169	261	595908	Unspecified disorder of lipoid metabolism	endocrine/metabolic
498	0.260925	1.62021	2.13162	1.1088	0.0643996	631350	1141	630209	Acute bronchospasm	respiratory
458.1	0.156262	1.33445	1.64073	1.02818	0.064834	698476	4576	693900	Orthostatic hypotension	circulatory system
370.3	0.244099	0.638402	1.11684	0.159968	0.065983	646251	4422	641829	Keratoconjunctivitis	sense organs
600	0.131479	1.27345	1.53115	1.01575	0.0659833	720890	11659	709231	Hyperplasia of prostate	genitourinary
256.4	0.125164	1.25827	1.50359	1.01295	0.0664289	696571	4464	692107	Polycystic ovaries	endocrine/metabolic
215	0.409641	0.472715	1.27561	-0.330182	0.0673895	738499	1229	737270	Other benign neoplasm of connective and other soft tissue	neoplasms
523.31	0.304703	1.74598	2.3432	1.14876	0.0673933	699296	821	698475	Acute periodontitis	digestive
444.1	0.319945	1.79482	2.42191	1.16773	0.0675283	694505	686	693819	Arterial embolism and thrombosis of lower extremity artery	circulatory system
723.1	1.00104	0.160899	2.12293	-1.80113	0.0679878	655632	607	655025	Torticollis	musculoskeletal
362.27	1.00116	0.161432	2.1237	-1.80084	0.0685209	688823	1652	687171	Drusen (degenerative) of retina	sense organs
287.32	0.25129	0.633291	1.12582	0.140763	0.0690766	683781	2402	681379	Secondary thrombocytopenia	hematopoietic
706.2	0.113389	1.22871	1.45096	1.00647	0.0693007	702106	7669	694437	Sebaceous cyst	dermatologic
573.9	0.178651	1.38156	1.73171	1.0314	0.070423	691538	2795	688743	Abnormal serum enzyme levels	digestive
81.12	1.00113	0.163649	2.12586	-1.79856	0.0706085	729122	601	728521	Chronic graft-versus-host disease	infectious diseases
395	0.0845927	0.858528	1.02433	0.692726	0.0713596	690940	24470	666470	Heart valve disorders	circulatory system
415.21	0.379342	0.50538	1.24889	-0.238131	0.0720154	690939	1512	689427	Primary pulmonary hypertension	circulatory system
395.2	0.137843	0.78066	1.05083	0.510488	0.0724379	678199	11729	666470	Nonrheumatic aortic valve disorders	circulatory system
701.2	0.159398	0.751627	1.06405	0.439207	0.0732586	707212	5435	701777	Scar conditions and fibrosis of skin	dermatologic
850	0.15245	1.31309	1.61189	1.01428	0.0739897	702589	3640	698949	Hemorrhage or hematoma complicating a procedure	injuries & poisonings
224	0.302903	0.584415	1.17811	-0.00927604	0.076176	738682	2055	736627	Benign neoplasm of eye	neoplasms
242.1	0.164204	1.3376	1.65944	1.01576	0.0764877	667456	2986	664470	Graves' disease	endocrine/metabolic
442.11	0.26198	1.58941	2.10289	1.07593	0.0769455	696717	2898	693819	Abdominal aortic aneurysm	circulatory system
736.3	0.507996	2.44938	3.44505	1.4537	0.0778218	679629	166	679463	Acquired deformities of hip	musculoskeletal
367.9	0.230676	0.666323	1.11845	0.214198	0.0784144	695671	3097	692574	Blindness and low vision	sense organs
411.8	0.118969	1.23274	1.46592	0.999559	0.0786189	667421	12983	654438	Other chronic ischemic heart disease, unspecified	circulatory system
276.11	0.175957	1.36216	1.70703	1.01728	0.0790011	621673	3011	618662	Hyperosmolality and/or hypernatremia	endocrine/metabolic
585.32	0.178372	0.733496	1.08311	0.383886	0.0822872	669874	6957	662917	End stage renal disease	genitourinary
293	0.231814	1.49542	1.94977	1.04106	0.0825812	720777	1220	719557	Symptoms involving head and neck	mental disorders
214.1	0.206263	1.42824	1.83251	1.02396	0.083972	739214	1944	737270	Lipoma of skin and subcutaneous tissue	neoplasms
285.2	0.121879	0.810086	1.04897	0.571203	0.0839774	639593	11605	627988	Anemia of chronic disease	hematopoietic
184.2	0.708721	0.296234	1.68533	-1.09286	0.0860485	716630	746	715884	Cancer of other female genital organs (excluding uterus and ovary)	neoplasms
337.1	0.357595	1.84751	2.5484	1.14663	0.0860557	642002	597	641405	Peripheral autonomic neuropathy	neurological
415	0.0907003	1.16836	1.34614	0.99059	0.0862393	702482	13055	689427	Pulmonary heart disease	circulatory system
526.42	0.382934	1.92782	2.67837	1.17727	0.0865088	698807	332	698475	Arthralgia/ankylosis of temporomandibular joint	digestive
352.1	0.202267	1.41438	1.81083	1.01794	0.0865218	696855	2224	694631	Trigeminal nerve disorders [CN5]	neurological
939	0.0627663	1.11328	1.23631	0.990262	0.0873142	650484	25652	624832	Atopic/contact dermatitis due to other or unspecified	dermatologic
769	0.413365	2.02089	2.83109	1.2107	0.0887594	749104	387	748717	Nonallopathic lesions NEC	symptoms
427.4	0.191143	1.38424	1.75888	1.0096	0.0889244	597493	2818	594675	Cardiac arrest and ventricular fibrillation	circulatory system
876	0.413118	2.01915	2.82886	1.20944	0.0889603	669456	330	669126	Posttraumatic wound infection not elsewhere classified	injuries & poisonings
473	0.105212	0.836214	1.04243	0.629999	0.0891112	554597	13314	541283	Diseases of the larynx and vocal cords	respiratory
526.9	0.382397	1.91535	2.66485	1.16585	0.0892165	698879	404	698475	Jaw disease NOS	digestive
250.7	0.19051	0.723694	1.09709	0.350295	0.0896055	693355	6184	687171	Diabetic retinopathy	endocrine/metabolic
394.4	0.453489	2.15651	3.04535	1.26767	0.0901475	666716	246	666470	Acute rheumatic heart disease	circulatory system
781.2	0.219478	0.689949	1.12013	0.259771	0.0908371	735774	2839	732935	Abnormal posture	symptoms
459.1	0.280296	1.60551	2.15489	1.05613	0.091203	694842	942	693900	Hemorrhage NOS	circulatory system
274.11	0.290282	0.61258	1.18153	0.0436265	0.0913584	735241	3565	731676	Gouty arthropathy	endocrine/metabolic
495.11	0.336693	1.76522	2.42513	1.1053	0.0914484	630865	656	630209	Chronic obstructive asthma with exacerbation	respiratory
557	0.194627	1.38871	1.77018	1.00724	0.0915643	620997	1807	619190	Intestinal malabsorption (non-celiac)	digestive
286.1	0.226026	1.46399	1.907	1.02098	0.0917223	682554	1175	681379	Congenital coagulation defects	hematopoietic
519.2	0.31978	1.71408	2.34084	1.08731	0.0919621	712632	607	712025	Respiratory complications	respiratory
110.11	0.131083	1.2463	1.50322	0.989373	0.0930219	685219	8727	676492	Dermatophytosis of nail	infectious diseases
535.9	0.190999	1.37774	1.75209	1.00338	0.0934021	703744	1882	701862	Gastritis and duodenitis, NOS	digestive
260.21	0.586828	2.65473	3.80491	1.50454	0.0961599	641911	151	641760	Kwashiorkor	endocrine/metabolic
282	0.19188	1.37552	1.75161	0.999437	0.0965876	631014	3026	627988	Hereditary hemolytic anemias	hematopoietic
401.21	0.120018	1.2203	1.45554	0.985067	0.0971345	555654	13641	542013	Hypertensive heart disease	circulatory system
456	0.220694	1.44134	1.8739	1.00878	0.0976272	673050	2745	670305	Chronic venous insufficiency [CVI]	circulatory system
457.2	0.280338	1.58976	2.13923	1.0403	0.0981965	671888	1583	670305	Encounter for long-term (current) use of antiplatelets/antithrombotics	circulatory system
560.1	0.157996	1.29817	1.60784	0.988496	0.0986054	622912	3722	619190	Paralytic ileus	digestive
755.4	0.337349	1.74148	2.40269	1.08028	0.100094	728461	535	727926	Congenital anomalies of upper limb, including shoulder girdle	congenital anomalies
962.2	0.506341	2.29319	3.28562	1.30076	0.101192	664470	195	664275	Insulins and antidiabetic agents causing adverse effects in therapeutic use	injuries & poisonings
374.3	0.251426	0.662301	1.1551	0.169506	0.101256	645191	3362	641829	Ptosis of eyelid	sense organs
480.13	0.291499	1.61213	2.18347	1.04079	0.101365	611847	775	611072	MRSA pneumonia	respiratory
276.8	0.41309	1.96378	2.77344	1.15412	0.102318	618967	305	618662	Polydipsia	endocrine/metabolic
560.3	0.291744	1.60868	2.1805	1.03686	0.103194	619992	802	619190	Peritoneal or intestinal adhesions	digestive
90.2	0.412528	1.95818	2.76674	1.14963	0.103308	745674	413	745261	Gonococcal infections	infectious diseases
610.4	0.334983	0.579503	1.23607	-0.077064	0.103378	701625	1575	700050	Benign neoplasm of breast	genitourinary
366.1	1.00132	0.195986	2.15858	-1.76661	0.103618	685016	454	684562	Nonsenile Cataract	sense organs
250.2	0.0497901	1.08393	1.18152	0.986344	0.105508	707936	63868	644068	Type 2 diabetes	endocrine/metabolic
550	0.0702	0.892711	1.0303	0.755119	0.105942	724797	24429	700368	Abdominal hernia	digestive
362.8	0.578904	0.393542	1.52819	-0.741111	0.107197	688025	854	687171	Retinal hemorrhage/ischemia	sense organs
8	0.109897	1.19338	1.40878	0.977987	0.107677	729026	7297	721729	Intestinal infection	infectious diseases
180.1	0.501742	0.446122	1.42954	-0.537292	0.107678	695062	1003	694059	Cervical cancer	neoplasms
174.3	1.00146	0.199768	2.16263	-1.76309	0.10778	706482	632	705850	Neoplasm of uncertain behavior of breast	neoplasms
728	0.23185	1.45104	1.90546	0.996611	0.108343	623394	1456	621938	Disorders of muscle, ligament, and fascia	musculoskeletal
619.2	0.178945	1.33263	1.68336	0.981895	0.108561	717998	2393	715605	Disorders of uterus, NEC	genitourinary
426.23	0.501541	0.451538	1.43456	-0.531483	0.112897	595918	1243	594675	Second degree AV block	circulatory system
334.1	0.578941	0.401378	1.5361	-0.733347	0.114851	642166	761	641405	Spinocerebellar disease	neurological
200	0.237047	0.688674	1.15329	0.224061	0.11561	734252	3058	731194	Myeloproliferative disease	neoplasms
749.2	0.2796	0.644374	1.19239	0.096357	0.115996	734671	3103	731568	Congenital anomalies of skull and face bones	congenital anomalies
426.2	0.214946	0.713716	1.13501	0.292422	0.116626	599970	5295	594675	Atrioventricular [AV] block	circulatory system
754.2	0.337093	1.6968	2.35751	1.0361	0.116754	728577	651	727926	Spondylolisthesis, congenital	congenital anomalies
596.1	1.00136	0.208026	2.1707	-1.75465	0.116892	705560	901	704659	Bladder neck obstruction	genitourinary
251	0.37943	0.552467	1.29615	-0.191217	0.117859	693786	1679	692107	Other disorders of pancreatic internal secretion	endocrine/metabolic
611	0.0888231	0.870354	1.04445	0.69626	0.117986	716850	16800	700050	Abnormal findings on mammogram or breast exam	genitourinary
695.8	0.226037	1.42319	1.86623	0.980162	0.11846	679739	1422	678317	Other specified erythematous conditions	dermatologic
365.2	0.355152	0.57451	1.27061	-0.121588	0.118627	692899	2455	690444	Primary angle-closure glaucoma	sense organs
756.3	0.379654	0.554774	1.2989	-0.189349	0.12068	728962	1036	727926	Congenital anomalies of muscle, tendon, fascia, and connective tissue	congenital anomalies
90.3	0.506414	2.19412	3.18669	1.20155	0.120743	745482	221	745261	Venereal diseases due to Chlamydia trachomatis	infectious diseases
471	0.225827	1.41953	1.86216	0.976913	0.120826	542987	1704	541283	Nasal polyps	respiratory
363	0.334908	0.594911	1.25133	-0.0615097	0.120973	692786	2342	690444	Chorioretinal inflammations, scars, and other disorders of choroid	sense organs
440	0.162619	1.28604	1.60477	0.967304	0.121872	700503	6684	693819	Atherosclerosis	circulatory system
347	0.304771	1.60068	2.19803	1.00333	0.122697	642050	645	641405	Cataplexy and narcolepsy	neurological
429.3	0.161903	1.2836	1.60093	0.966265	0.123058	686184	3500	682684	Symptoms involving cardiovascular system	circulatory system
473.3	0.290096	0.639407	1.208	0.0708196	0.123169	543875	2592	541283	Paralysis/spasm of vocal cords or larynx	respiratory
282.8	1.00133	0.21461	2.17721	-1.74799	0.12432	628577	589	627988	Other hemoglobinopathies	hematopoietic
289.3	0.244894	1.45561	1.9356	0.975613	0.125277	664673	1313	663360	Personal history of diseases of blood and blood-forming organs	hematopoietic
748	0.30335	0.628318	1.22288	0.0337513	0.125541	733790	2222	731568	Anomalies of respiratory system, congenital	congenital anomalies
656.1	0.585295	2.44932	3.5965	1.30214	0.125886	721780	626	721154	Isoimmunization of fetus or newborn	pregnancy complications
613	0.107423	1.17831	1.38886	0.967759	0.126657	733303	8278	725025	Other nonmalignant breast conditions	genitourinary
395.6	0.164335	1.28531	1.60741	0.963212	0.126671	671125	4655	666470	Heart valve replaced	circulatory system
275.6	0.251467	0.68239	1.17527	0.189514	0.128587	721804	3522	718282	Hypercalcemia	endocrine/metabolic
618.5	0.501998	0.468937	1.45285	-0.51498	0.131415	741839	1640	740199	Prolapse of vaginal vault after hysterectomy	genitourinary
446.5	0.583488	2.40815	3.55178	1.26451	0.132013	694218	399	693819	Giant cell arteritis	circulatory system
972	0.22044	1.39356	1.82563	0.961502	0.132204	665795	1520	664275	Poisoning by agents primarily affecting the cardiovascular system	injuries & poisonings
709.6	0.2531	1.46359	1.95967	0.967517	0.132346	674457	1109	673348	Other specified diffuse diseases of connective tissue	dermatologic
112.3	0.302888	0.634111	1.22777	0.0404499	0.132591	678289	1797	676492	Candidiasis of skin and nails	infectious diseases
656.22	0.61001	2.50085	3.69647	1.30523	0.132929	721735	581	721154	Interstitial emphysema and related conditions of newborn	pregnancy complications
210	0.379535	0.565381	1.30927	-0.178507	0.132965	742007	1370	740637	Benign neoplasm of lip, oral cavity, and pharynx	neoplasms
255.3	1.00155	0.222922	2.18595	-1.74011	0.133973	692498	391	692107	Adrenogenital disorders	endocrine/metabolic
695.9	0.252681	1.45936	1.95462	0.964109	0.134664	679314	997	678317	Unspecified erythematous condition	dermatologic
352	0.154246	1.2594	1.56173	0.957079	0.134849	698758	4127	694631	Disorders of other cranial nerves	neurological
604.1	0.207801	0.734814	1.1421	0.327525	0.138113	694342	5417	688925	Redundant prepuce and phimosis/BXO	genitourinary
695	0.0890187	1.14108	1.31556	0.966603	0.138194	690880	12563	678317	Erythematous conditions	dermatologic
580.14	1.00135	0.226868	2.18952	-1.73578	0.138504	663430	513	662917	Chronic glomerulonephritis, NOS	genitourinary
613.5	0.152793	1.25367	1.55314	0.954192	0.138981	728812	3787	725025	Mastodynia	genitourinary
619.3	0.31966	1.60379	2.23033	0.97726	0.13948	716278	673	715605	Noninflammatory disorders of cervix	genitourinary
938.1	0.50686	2.112	3.10544	1.11855	0.140204	624997	165	624832	Acute dermatitis due to solar radiation	dermatologic
686.5	0.505987	2.106	3.09773	1.11426	0.141033	655337	218	655119	Pyoderma	dermatologic
743.1	0.0992971	1.15733	1.35195	0.962707	0.141158	709477	16642	692835	Osteoporosis	musculoskeletal
614.1	0.245123	1.43418	1.91462	0.953738	0.141273	710577	1335	709242	Pelvic peritoneal adhesions, female (postoperative) (postinfection)	genitourinary
277	0.165602	0.783815	1.1084	0.459236	0.141321	735844	4485	731359	Other disorders of metabolism	endocrine/metabolic
242.3	0.579018	0.427793	1.56267	-0.707083	0.142519	665153	683	664470	Exophthalmos	endocrine/metabolic
620	0.7094	0.354774	1.7452	-1.03565	0.144077	740292	600	739692	Dysplasia of female genital organs	genitourinary
433	0.0786392	1.12157	1.2757	0.967433	0.144596	718326	26051	692275	Cerebrovascular disease	circulatory system
286	0.0898653	1.13986	1.316	0.963728	0.145193	693033	11654	681379	Coagulation defects	hematopoietic
594.2	0.708745	0.356192	1.74533	-1.03295	0.145255	717425	655	716770	Calculus of lower urinary tract	genitourinary
287.2	0.413173	1.81584	2.62566	1.00602	0.14879	681708	329	681379	Allergic purpura	hematopoietic
358.1	0.708785	0.362448	1.75167	-1.02677	0.152187	714802	722	714080	Myasthenia gravis	neurological
459.9	0.184491	1.3005	1.6621	0.938895	0.154397	697134	3234	693900	Circulatory disease NEC	circulatory system
442.1	0.166806	1.26786	1.5948	0.940922	0.154794	699136	5317	693819	Aortic aneurysm	circulatory system
430.2	0.243917	0.706932	1.18501	0.228854	0.155062	695197	2922	692275	Intracerebral hemorrhage	circulatory system
426	0.0841326	1.12683	1.29173	0.961931	0.155812	615523	20848	594675	Cardiac conduction disorders	circulatory system
790.8	0.260914	1.4478	1.95919	0.936407	0.156115	736491	1092	735399	Elevated C-reactive protein (CRP)	symptoms
656.9	0.528706	2.11247	3.14874	1.07621	0.157213	722369	1215	721154	Neonatal bradycardia or tachycardia	pregnancy complications
580.1	0.334769	0.623819	1.27997	-0.0323281	0.158654	664470	1553	662917	Glomerulonephritis	genitourinary
429	0.134106	1.2073	1.47015	0.944453	0.160092	688340	5656	682684	Ill-defined descriptions and complications of heart disease	circulatory system
599.1	0.57902	0.443929	1.57881	-0.690951	0.160758	628093	1075	627018	Urinary obstruction	genitourinary
610.2	1.00177	0.246862	2.21032	-1.7166	0.162576	700430	380	700050	Fibroadenosis of breast	genitourinary
375.2	0.708839	0.371828	1.76115	-1.0175	0.162806	654372	792	653580	Epiphora	sense organs
381.9	0.237104	0.718275	1.183	0.253551	0.162834	630654	2487	628167	Otorrhea	sense organs
701	0.0893572	0.882778	1.05792	0.707638	0.162922	716580	14803	701777	Other hypertrophic and atrophic conditions of skin	dermatologic
252.2	0.579184	0.446205	1.58141	-0.688996	0.163529	692764	657	692107	Hypoparathyroidism	endocrine/metabolic
741.5	0.506056	2.02152	3.01339	1.02965	0.164269	666487	230	666257	Hemarthrosis	musculoskeletal
358	0.448875	0.536912	1.41671	-0.342882	0.165896	715178	1098	714080	Myoneural disorders	neurological
335	0.17291	0.78757	1.12647	0.448667	0.167252	646014	4609	641405	Multiple sclerosis	neurological
270.21	0.452479	1.86785	2.75471	0.980989	0.167338	728799	252	728547	Disorders of urea cycle metabolism	endocrine/metabolic
276.42	0.231599	1.37678	1.83072	0.922851	0.167395	620233	1571	618662	Alkalosis	endocrine/metabolic
573.1	0.584868	2.2416	3.38794	1.09525	0.16755	688901	158	688743	Chronic passive congestion of liver	digestive
334	0.201338	0.757791	1.15241	0.363169	0.168351	644866	3461	641405	Degenerative disease of the spinal cord	neurological
509.2	0.13299	1.20069	1.46135	0.940035	0.169039	656433	5953	650480	Respiratory insufficiency	respiratory
427.12	0.168532	0.793538	1.12386	0.463216	0.170012	601907	7232	594675	Paroxysmal ventricular tachycardia	circulatory system
528	0.107397	1.15861	1.3691	0.948108	0.170443	728430	7475	720955	Diseases of the oral soft tissues, excluding lesions specific for gingiva and tongue	digestive
426.24	0.269074	0.691697	1.21908	0.164312	0.170715	598346	3671	594675	Atrioventricular block, complete	circulatory system
740.3	0.451986	1.85707	2.74296	0.971174	0.170841	650349	669	649680	Osteoarthrosis involving more than one site, but not specified as generalized	musculoskeletal
772	0.18141	1.28162	1.63719	0.926062	0.171381	697234	2318	694916	Symptoms of the muscles	symptoms
366	0.0721666	0.906088	1.04753	0.764642	0.17177	733022	48460	684562	Cataract	sense organs
609	1.00165	0.254668	2.21791	-1.70857	0.172084	689361	436	688925	Male infertility and abnormal spermatozoa	genitourinary
743.4	0.245189	1.39742	1.87799	0.916848	0.172325	693935	1100	692835	Stress fracture	musculoskeletal
364.41	0.708734	0.380524	1.76964	-1.00859	0.172793	691067	623	690444	Keratoconus	sense organs
363.3	0.448911	0.542515	1.42238	-0.33735	0.173112	691764	1320	690444	Chorioretinal scars	sense organs
270.38	0.269885	1.44396	1.97293	0.914984	0.173426	729458	911	728547	Other specified disorders of plasma protein metabolism	endocrine/metabolic
270.32	0.355132	0.617019	1.31308	-0.0790398	0.17394	730980	2433	728547	Paraproteinemia	endocrine/metabolic
277.5	0.260695	1.42469	1.93566	0.913732	0.174545	732454	1095	731359	Other disorders of lipoid metabolism	endocrine/metabolic
656.6	0.521203	2.02241	3.04397	1.00085	0.176607	722220	1066	721154	Perinatal disorders of digestive system	pregnancy complications
696.42	0.202194	1.31357	1.70987	0.917271	0.177353	665163	2016	663147	Psoriatic arthropathy	dermatologic
443.9	0.15015	1.22421	1.51851	0.929921	0.177878	702539	8720	693819	Peripheral vascular disease, unspecified	circulatory system
495.1	0.210503	1.32683	1.73941	0.914243	0.179139	632380	2171	630209	Chronic obstructive asthma	respiratory
513.8	0.501696	0.510118	1.49344	-0.473206	0.179701	720232	917	719315	Disorders of diaphragm	respiratory
947	0.138981	1.20493	1.47733	0.932525	0.179812	629139	4307	624832	Urticaria	dermatologic
256	0.12149	1.17608	1.4142	0.937964	0.181873	697149	5042	692107	Ovarian dysfunction	endocrine/metabolic
292.5	0.230782	0.735054	1.18739	0.28272	0.182278	670561	2399	668162	Transient alteration of awareness	mental disorders
341	0.278918	0.692072	1.23875	0.145394	0.186963	643294	1889	641405	Other demyelinating diseases of central nervous system	neurological
575.6	0.584822	2.16197	3.30822	1.01572	0.187376	722536	157	722379	Cholesterolosis of gallbladder	digestive
962	0.27985	1.44343	1.99194	0.894926	0.189688	665262	987	664275	Poisoning by hormones and synthetic substitutes	injuries & poisonings
593.2	0.290096	0.683938	1.25253	0.115351	0.190356	625194	2316	622878	Microscopic hematuria	genitourinary
756.1	1.00187	0.270851	2.23451	-1.69281	0.192318	728461	535	727926	Congenital anomalies of abdominal wall; diaphram	congenital anomalies
599.6	0.319185	1.51589	2.14149	0.890288	0.192463	627802	784	627018	Oliguria and anuria	genitourinary
537.1	0.583984	2.13945	3.28406	0.994842	0.192798	702128	266	701862	Lesions of stomach and duodenum	digestive
780	0.260664	1.40374	1.91464	0.892833	0.193242	747448	1026	746422	Hypothermia/Chills	symptoms
368.4	0.33493	0.647627	1.30409	-0.00883573	0.194594	701036	1646	699390	Visual field defects	sense organs
315.1	0.449016	0.559393	1.43947	-0.320679	0.195761	685651	1116	684535	Learning disorder	mental disorders
229	0.708954	0.400646	1.7902	-0.988903	0.196989	747524	521	747003	Benign neoplasm of unspecified sites	neoplasms
535	0.125503	1.17558	1.42156	0.929589	0.197442	707026	5164	701862	Gastritis and duodenitis	digestive
701.3	0.502061	0.525269	1.50931	-0.45877	0.199702	702629	852	701777	Circumscribed scleroderma	dermatologic
550.4	0.170325	0.804402	1.13824	0.470564	0.201291	704811	4443	700368	Umbilical hernia	digestive
250.23	0.201864	0.772634	1.16829	0.376981	0.201307	649928	5860	644068	Type 2 diabetes with ophthalmic manifestations	endocrine/metabolic
560.2	0.379619	0.618061	1.36211	-0.125992	0.204975	620261	1071	619190	Impaction of intestine	digestive
281.13	0.716597	2.47381	3.87834	1.06928	0.206239	628108	120	627988	Folate-deficiency anemia	hematopoietic
755.6	0.303337	0.681796	1.27634	0.0872545	0.206695	729702	1776	727926	Other congenital anomalies of lower limb, including pelvic girdle	congenital anomalies
359.1	0.449006	0.567497	1.44755	-0.312556	0.207049	714832	752	714080	Muscular dystrophies	neurological
627.4	0.336789	1.52635	2.18646	0.866241	0.209255	653094	674	652420	Premenopausal menorrhagia	genitourinary
735.2	0.166391	1.23171	1.55784	0.905588	0.210384	684229	4766	679463	Acquired toe deformities	musculoskeletal
331.9	0.356764	1.56173	2.26098	0.86247	0.211466	642434	1029	641405	Cerebral degeneration, unspecified	neurological
253.5	0.279149	0.706613	1.25374	0.159481	0.213485	693884	1777	692107	Pituitary dwarfism	endocrine/metabolic
529	0.291435	1.43419	2.00541	0.86298	0.215963	721824	869	720955	Diseases and other conditions of the tongue	digestive
290.16	0.506515	1.86828	2.86105	0.875507	0.21722	669266	1104	668162	Vascular dementia	mental disorders
362.5	1.00214	0.291706	2.2559	-1.67249	0.21893	687573	402	687171	Toxic maculopathy of retina	sense organs
871.4	0.451724	1.73149	2.61687	0.846111	0.22425	669448	322	669126	Open wound of toe(s)	injuries & poisonings
395.4	0.303122	0.692928	1.28705	0.0988082	0.226215	667807	1337	666470	Nonrheumatic pulmonary valve disorders	circulatory system
513.31	0.335268	0.66667	1.32379	0.00954588	0.226524	721037	1722	719315	Apnea	respiratory
573.2	0.317825	0.681039	1.30398	0.0581007	0.226802	690443	1700	688743	Liver replaced by transplant	digestive
425.12	0.579213	0.499264	1.63452	-0.635994	0.230431	720050	674	719376	Other hypertrophic cardiomyopathy	circulatory system
528.7	0.584235	2.01486	3.15996	0.869763	0.230492	721131	176	720955	Sialolithiasis	digestive
530.9	0.22583	1.31062	1.75325	0.867994	0.230992	595981	1663	594318	Heartburn	digestive
348.9	0.137372	0.848759	1.11801	0.57951	0.232595	647628	6223	641405	Other conditions of brain, NOS	neurological
743.21	0.357133	1.52349	2.22347	0.82351	0.23846	693784	949	692835	Pathologic fracture of vertebrae	musculoskeletal
430.3	0.317823	0.687706	1.31064	0.0647727	0.238799	693942	1667	692275	Subdural hemorrhage	circulatory system
958.1	0.505518	1.81182	2.80263	0.821001	0.239721	742696	272	742424	Postoperative shock	injuries & poisonings
727.5	0.336637	1.48443	2.14424	0.824626	0.240607	622750	812	621938	Rupture of synovium	musculoskeletal
695.1	1.00199	0.309459	2.27335	-1.65444	0.241758	678623	306	678317	Toxic erythema	dermatologic
260.7	0.585398	1.98421	3.13159	0.836831	0.241791	641882	122	641760	Polyphagia	endocrine/metabolic
529.6	0.584248	1.98017	3.12529	0.835043	0.242268	721164	209	720955	Glossodynia	digestive
695.7	0.244839	1.32889	1.80877	0.849006	0.245499	679983	1666	678317	Prurigo and Lichen	dermatologic
626.15	0.709322	0.43901	1.82928	-0.951262	0.245808	652845	425	652420	Infertility, female, associated with anovulation	genitourinary
588.1	0.176071	1.22512	1.57022	0.880024	0.248836	667272	4355	662917	Renal osteodystrophy	genitourinary
704.11	0.291305	1.39853	1.96948	0.827568	0.249553	712865	913	711952	Alopecia Areata	dermatologic
550.6	0.168472	1.21364	1.54384	0.883432	0.25044	703989	3621	700368	Incisional hernia	digestive
444.2	0.505631	1.78624	2.77727	0.795199	0.251257	694117	298	693819	Embolism and thrombosis of abdominal aorta	circulatory system
371.1	0.23713	0.761877	1.22665	0.297102	0.251414	644774	2945	641829	Uveitis, noninfectious or NOS	sense organs
426.4	0.410055	0.624967	1.42867	-0.17874	0.25166	595525	850	594675	Anomalous atrioventricular excitation	circulatory system
428.1	0.0854546	0.90674	1.07423	0.739249	0.251948	708005	25321	682684	Congestive heart failure (CHF) NOS	circulatory system
872	0.260498	1.34554	1.85611	0.83496	0.254566	670380	1254	669126	Traumatic amputation	injuries & poisonings
217	0.259812	0.744035	1.25327	0.234803	0.255117	698631	1772	696859	Vascular hamartomas and non-neoplastic nevi	neoplasms
214	0.181383	1.22887	1.58438	0.873358	0.255857	740116	2846	737270	Lipoma	neoplasms
695.41	0.501879	0.565714	1.5494	-0.417968	0.256347	673637	858	672779	Cutaneous lupus erythematosus	dermatologic
282.5	0.320655	1.43766	2.06614	0.809175	0.257589	629398	1410	627988	Sickle cell anemia	hematopoietic
946	0.355191	0.669103	1.36528	-0.0270721	0.257941	626199	1367	624832	Anaphylactic shock NOS	injuries & poisonings
327.5	0.260684	1.34127	1.85221	0.830329	0.260025	641384	1285	640099	Parasomnia	neurological
224.1	0.410126	0.630124	1.43397	-0.173723	0.260127	737999	1372	736627	Benign neoplasm of eye, uveal	neoplasms
555.2	0.149106	1.18176	1.474	0.88951	0.262703	622844	3654	619190	Ulcerative colitis	digestive
337	0.215311	1.27206	1.69407	0.85005	0.263727	643404	1999	641405	Disorders of the autonomic nervous system	neurological
220	0.318088	0.70195	1.3254	0.0784963	0.265896	697333	1325	696008	Benign neoplasm of ovary	neoplasms
427.22	0.179352	0.81961	1.17114	0.46808	0.267367	603231	8556	594675	Atrial flutter	circulatory system
790.1	0.304457	1.40039	1.99713	0.803655	0.268696	736409	1010	735399	Elevated sedimentation rate	symptoms
362.31	1.00218	0.331161	2.29543	-1.63311	0.270137	687554	383	687171	Separation of retinal layers	sense organs
479	0.0744057	1.08523	1.23106	0.939394	0.271654	560175	18892	541283	Other upper respiratory disease	respiratory
411.9	0.505001	1.74183	2.73163	0.752028	0.27182	654868	430	654438	Other acute and subacute forms of ischemic heart disease	circulatory system
530.13	0.410254	0.637129	1.44123	-0.166969	0.27186	595711	1393	594318	Barrett's esophagus	digestive
691.3	0.579338	0.530126	1.66563	-0.605376	0.273316	679007	690	678317	Congenital pigmentary anomalies of skin	dermatologic
261.41	0.451924	1.63398	2.51975	0.748208	0.277255	642059	299	641760	Rickets or osteomalacia	endocrine/metabolic
755.3	0.70925	0.463237	1.85337	-0.926893	0.277934	728752	826	727926	Congenital anomaly of fingers/toes	congenital anomalies
411.4	0.0665731	1.07476	1.20524	0.944278	0.278809	706691	52253	654438	Coronary atherosclerosis	circulatory system
368.2	0.205572	0.801933	1.20485	0.399012	0.282941	702829	3439	699390	Diplopia and disorders of binocular vision	sense organs
733	0.144426	0.857096	1.14017	0.574021	0.285653	656179	6626	649553	Other disorders of bone and cartilage	musculoskeletal
588.2	0.379637	0.668305	1.41239	-0.0757834	0.288432	664478	1561	662917	Secondary hyperparathyroidism (of renal origin)	genitourinary
473.4	0.119383	0.881254	1.11525	0.647263	0.289669	551579	10296	541283	Voice disturbance	respiratory
370	0.154021	0.84986	1.15174	0.54798	0.290857	648598	6769	641829	Keratitis	sense organs
851	0.268764	0.752911	1.27969	0.226133	0.290981	700970	2021	698949	Complications of transplants and reattached limbs	injuries & poisonings
737	0.09132	1.10104	1.28003	0.922053	0.291862	689039	9576	679463	Curvature of spine	musculoskeletal
395.1	0.112174	0.889944	1.1098	0.670083	0.298603	680438	13968	666470	Nonrheumatic mitral valve disorders	circulatory system
287.4	1.0023	0.354054	2.31857	-1.61046	0.300241	681631	252	681379	Qualitative platelet defects	hematopoietic
733.9	0.280011	1.33641	1.88523	0.787583	0.300383	650679	1126	649553	Chondromalacia	musculoskeletal
433.21	0.124955	1.1375	1.38241	0.892589	0.302521	701427	9152	692275	Cerebral artery occlusion, with cerebral infarction	circulatory system
597.8	0.410174	0.655297	1.45924	-0.148644	0.302796	706089	1430	704659	Urethral hypermobility/ISD	genitourinary
514.2	0.166182	1.18642	1.51213	0.8607	0.30366	727799	4570	723229	Solitary pulmonary nodule	respiratory
574.2	0.269649	1.31962	1.84813	0.791107	0.303699	723644	1265	722379	Calculus of bile duct	digestive
427.1	0.104317	0.89831	1.10277	0.693848	0.303941	608381	13706	594675	Paroxysmal tachycardia, unspecified	circulatory system
714.2	0.3181	0.722538	1.34602	0.0990615	0.30695	692399	1229	691170	Juvenile rheumatoid arthritis	musculoskeletal
503	0.136145	0.870316	1.13716	0.603471	0.307621	657222	6742	650480	Pulmonary congestion and hypostasis	respiratory
509.5	0.45154	1.58424	2.46926	0.699225	0.308216	650828	348	650480	Respiratory arrest	respiratory
442.3	1.00214	0.360345	2.32454	-1.60385	0.308433	694352	533	693819	Aneurysm of artery of lower extremity	circulatory system
280.2	0.164017	1.18182	1.50329	0.860342	0.308438	632408	4420	627988	Iron deficiency anemia secondary to blood loss (chronic)	hematopoietic
604.3	0.709563	0.485874	1.87662	-0.904869	0.309032	689494	569	688925	Peyronie's disease	genitourinary
504.1	0.356752	1.43704	2.13628	0.73781	0.309458	651555	1075	650480	Idiopathic fibrosing alveolitis	respiratory
609.1	1.00227	0.36184	2.32629	-1.60261	0.310462	689214	289	688925	Infertility, male	genitourinary
724.2	0.269848	1.31402	1.84292	0.785117	0.31153	656284	1259	655025	Disorders of coccyx	musculoskeletal
264.2	0.195388	0.820682	1.20364	0.437722	0.311813	647610	5850	641760	Failure to thrive (childhood)	endocrine/metabolic
759	0.159505	0.851292	1.16392	0.538662	0.312796	732443	4505	727938	Other and unspecified congenital anomalies	congenital anomalies
250.22	0.166536	0.845538	1.17195	0.519127	0.313702	652018	7950	644068	Type 2 diabetes with renal manifestations	endocrine/metabolic
283.1	1.00226	0.364795	2.32921	-1.59963	0.314343	628285	297	627988	Autoimmune hemolytic anemias	hematopoietic
208	0.11881	0.88753	1.1204	0.654661	0.315266	718275	13173	705102	Benign neoplasm of colon	neoplasms
333.3	0.449209	0.63695	1.5174	-0.243499	0.315316	642078	673	641405	Tics and choreas	neurological
532	0.0686245	1.07121	1.20571	0.936703	0.31617	617814	23496	594318	Dysphagia	digestive
433.5	0.220455	1.24612	1.67821	0.814025	0.318239	694472	2197	692275	Cerebral aneurysm	circulatory system
715.3	0.504979	1.65002	2.63978	0.660257	0.321346	691516	346	691170	Spinal enthesopathy	musculoskeletal
510	0.0795858	1.08192	1.23791	0.925935	0.322481	723068	16699	706369	Other diseases of lung	respiratory
510.2	0.579543	0.563841	1.69975	-0.572064	0.32282	706947	578	706369	Lung transplant	respiratory
227.3	0.268828	0.767171	1.29407	0.240268	0.324168	739157	1849	737308	Benign neoplasm of pituitary gland and craniopharyngeal duct (pouch)	neoplasms
527.7	0.317859	0.731123	1.35413	0.10812	0.324496	722493	1538	720955	Disturbance of salivary secretion	digestive
270.33	0.709249	0.497342	1.88747	-0.892787	0.324716	729174	627	728547	Amyloidosis	endocrine/metabolic
389.4	0.150511	0.862377	1.15738	0.567375	0.325247	683838	6289	677549	Tinnitus	sense organs
312.3	0.252331	1.28149	1.77606	0.786921	0.325643	685779	1244	684535	Impulse control disorder	mental disorders
513.4	0.170344	0.845854	1.17973	0.51198	0.325719	723267	3952	719315	Hyperventilation	respiratory
433.6	0.25169	0.78131	1.27462	0.287997	0.326836	695911	3636	692275	Acute, but ill-defined cerebrovascular disease	circulatory system
286.13	0.41226	1.49506	2.30309	0.687029	0.329305	681738	359	681379	Congenital factor VIII disorder	hematopoietic
580.31	0.244647	1.26855	1.74806	0.789045	0.330888	664817	1900	662917	Nephritis and nephropathy in diseases classified elsewhere	genitourinary
285.21	0.173533	1.18359	1.52372	0.843468	0.331393	632715	4727	627988	Anemia in chronic kidney disease	hematopoietic
425.1	0.12032	0.890043	1.12587	0.654217	0.332977	731444	12068	719376	Primary/intrinsic cardiomyopathies	circulatory system
627	0.0803735	1.08088	1.23842	0.923351	0.333187	674088	21668	652420	Menopausal and postmenopausal disorders	genitourinary
446.4	1.00257	0.379244	2.34428	-1.58579	0.333499	694108	289	693819	Wegener's granulomatosis	circulatory system
592.12	1.00216	0.379605	2.34384	-1.58464	0.333777	623283	405	622878	Chronic cystitis	genitourinary
370.31	0.251912	0.784274	1.27802	0.290527	0.334739	645684	3855	641829	Keratoconjunctivitis sicca	sense organs
362.23	0.318061	0.736822	1.36022	0.113423	0.336944	689749	2578	687171	Cystoid macular degeneration of retina	sense organs
255.12	1.00213	0.382305	2.34647	-1.58186	0.337308	692495	388	692107	Hyperaldosteronism	endocrine/metabolic
430	0.159488	0.858264	1.17086	0.545666	0.337892	697876	5601	692275	Intracranial hemorrhage	circulatory system
728.71	0.579632	0.575036	1.71111	-0.561043	0.339774	622864	926	621938	Contracture of palmar fascia [Dupuytren's disease]	musculoskeletal
757	1.0026	0.384458	2.34955	-1.58063	0.340365	728169	231	727938	Congenital anomalies of the integument	congenital anomalies
401.3	0.154442	0.863091	1.1658	0.560384	0.340422	549498	7485	542013	Other hypertensive complications	circulatory system
695.2	0.504718	1.61667	2.60592	0.627426	0.341218	678709	392	678317	Bullous dermatoses	dermatologic
696.3	0.451225	1.53447	2.41887	0.650069	0.342652	678717	400	678317	Pityriasis	dermatologic
279.8	1.00255	0.386725	2.35173	-1.57828	0.343322	723907	253	723654	Other specified disorders involving the immune mechanism	endocrine/metabolic
586.4	0.214759	0.815999	1.23693	0.395071	0.343721	666101	3184	662917	Stricture/obstruction of ureter	genitourinary
580.2	0.355253	0.714517	1.41081	0.0182206	0.344035	664185	1268	662917	Nephrotic syndrome without mention of glomerulonephritis	genitourinary
362.4	0.303334	0.751281	1.34581	0.156747	0.345796	689887	2716	687171	Retinal vascular changes and abnomalities	sense organs
502	0.22576	1.23676	1.67925	0.794271	0.34658	653030	2550	650480	Postinflammatory pulmonary fibrosis	respiratory
226	0.41029	0.680852	1.48502	-0.123316	0.348797	738248	940	737308	Benign neoplasm of thyroid glands	neoplasms
242.2	0.502346	0.625031	1.60963	-0.359568	0.349521	665345	875	664470	Toxic multinodular goiter	endocrine/metabolic
284.1	0.165777	0.856342	1.18126	0.531419	0.349526	632746	4758	627988	Pancytopenia	hematopoietic
930	0.159488	0.861575	1.17417	0.548979	0.350202	629500	4668	624832	Allergic reaction to food	injuries & poisonings
585.4	0.190445	0.837047	1.21032	0.463776	0.350306	667405	4488	662917	Chronic kidney disease, Stage I or II	genitourinary
580.12	0.501929	0.626035	1.60982	-0.357746	0.35077	663611	694	662917	Non-proliferative glomerulonephritis	genitourinary
401.2	0.0921589	1.08951	1.27014	0.908874	0.352283	566832	24819	542013	Hypertensive heart and/or renal disease	circulatory system
250.13	0.303212	0.75435	1.34864	0.160055	0.352521	645688	1620	644068	Type 1 diabetes with ophthalmic manifestations	endocrine/metabolic
942	0.709326	0.517295	1.90757	-0.872983	0.352759	625254	422	624832	Infusion and transfusion reaction	injuries & poisonings
574.3	0.2256	1.23294	1.67512	0.790763	0.353307	724345	1966	722379	Cholecystitis without cholelithiasis	digestive
477	0.138997	1.13761	1.41005	0.865177	0.353628	546969	5686	541283	Epistaxis or throat hemorrhage	respiratory
736.6	0.379875	0.703215	1.44777	-0.0413396	0.353997	680385	922	679463	Unequal leg length (acquired)	musculoskeletal
259	0.225173	0.812025	1.25336	0.370687	0.355105	694193	2086	692107	Other endocrine disorders	endocrine/metabolic
526.3	0.244813	1.25206	1.73189	0.772227	0.358507	699770	1295	698475	Anomalies of jaw size/symmetry	digestive
371	0.0782488	1.07446	1.22782	0.921089	0.358733	662569	20740	641829	Inflammation of the eye	sense organs
527	0.219627	0.81752	1.24799	0.38705	0.358947	723753	2798	720955	Diseases of the salivary glands	digestive
426.9	0.145327	0.87565	1.16049	0.590809	0.360864	605886	11211	594675	Cardiac pacemaker/device in situ	circulatory system
286.7	0.113228	1.10885	1.33078	0.886921	0.361502	688707	7328	681379	Other and unspecified coagulation defects	hematopoietic
627.1	0.232233	0.809783	1.26496	0.354607	0.363601	655939	3519	652420	Postmenopausal bleeding	genitourinary
260.6	0.197557	0.835957	1.22317	0.448745	0.364424	644991	3231	641760	Anorexia	endocrine/metabolic
737.1	0.237911	1.24	1.7063	0.773691	0.365912	680778	1315	679463	Kyphosis (acquired)	musculoskeletal
520.1	1.00248	0.404175	2.36903	-1.56068	0.366171	698716	241	698475	Hereditary disturbances in tooth structure	digestive
589	0.50475	1.57653	2.56584	0.587218	0.367119	663218	301	662917	Abnormal results of function study of kidney	genitourinary
286.6	0.709508	0.527486	1.91812	-0.86315	0.367314	681738	359	681379	Defibrination syndrome	hematopoietic
571.6	0.502191	0.636832	1.62113	-0.347463	0.368888	689453	710	688743	Primary biliary cirrhosis	digestive
433.2	0.122207	1.11475	1.35427	0.875222	0.374067	701806	9531	692275	Occlusion of cerebral arteries	circulatory system
227	0.205575	0.833652	1.23658	0.430726	0.376142	740420	3112	737308	Benign neoplasm of other endocrine glands and related structures	neoplasms
425.2	0.219864	0.823752	1.25469	0.392818	0.377861	723526	4150	719376	Secondary/extrinsic cardiomyopathies	circulatory system
656.4	0.511697	1.56899	2.57192	0.566068	0.37871	722449	1295	721154	Hemorrhage of fetus or newborn	pregnancy complications
701.4	0.2515	0.802595	1.29553	0.309656	0.381915	703914	2137	701777	Keloid scar	dermatologic
441.2	1.00278	0.416528	2.38199	-1.54893	0.382461	694094	275	693819	Chronic vascular insufficiency of intestine	circulatory system
374	0.110053	1.10074	1.31644	0.885034	0.383135	655773	13944	641829	Other disorders of eyelids	sense organs
599.9	0.126806	1.11692	1.36547	0.868384	0.383191	635051	8033	627018	Other abnormality of urination	genitourinary
614.32	0.356644	1.36207	2.06109	0.663046	0.386259	709909	667	709242	Chronic inflammatory pelvic disease	genitourinary
292.12	0.449195	0.678062	1.55848	-0.202361	0.387084	668976	814	668162	Symbolic dysfunction	mental disorders
244.2	0.154008	0.875634	1.17749	0.573779	0.3885	669170	4700	664470	Acquired hypothyroidism	endocrine/metabolic
709.2	0.269236	0.79425	1.32195	0.266548	0.39222	675746	2398	673348	Sicca syndrome	dermatologic
753.2	0.502325	0.652597	1.63715	-0.331961	0.395525	735977	611	735366	Congenital anomalies of posterior segment of eye	congenital anomalies
253.4	0.355433	0.739549	1.4362	0.0428995	0.395957	693224	1117	692107	Anterior pituitary disorders	endocrine/metabolic
715.2	0.319135	1.31086	1.93636	0.685355	0.39634	691988	818	691170	Ankylosing spondylitis	musculoskeletal
613.9	0.709769	0.548038	1.93919	-0.843109	0.39681	725430	405	725025	Breast disorder NOS	genitourinary
618.2	0.26097	1.24725	1.75875	0.735746	0.397215	741968	1769	740199	Uterine/Uterovaginal prolapse	genitourinary
271.9	0.7096	0.548876	1.93969	-0.84194	0.397898	745966	333	745633	Other disorders of carbohydrate transport and metabolism	endocrine/metabolic
258.1	0.505463	1.5321	2.5228	0.54139	0.39864	692376	269	692107	Postablative ovarian failure	endocrine/metabolic
523	0.137574	1.12297	1.39261	0.853324	0.399226	703494	5019	698475	Gingival and periodontal diseases	digestive
697	0.335062	0.754008	1.41073	0.0972853	0.399403	679933	1616	678317	Sarcoidosis	dermatologic
585.3	0.0944416	0.924235	1.10934	0.739129	0.404134	685865	22948	662917	Chronic renal failure [CKD]	genitourinary
698	0.140138	1.12378	1.39845	0.849108	0.404997	737080	5086	731994	Pruritus and related conditions	dermatologic
313.2	0.355555	0.744504	1.44139	0.0476157	0.406657	685604	1069	684535	Tics and stuttering	mental disorders
743.13	0.187384	0.85687	1.22414	0.489597	0.409745	697576	4741	692835	Other specified osteoporosis	musculoskeletal
755.61	0.31834	0.769229	1.39318	0.145282	0.409844	729402	1476	727926	Congenital hip dysplasia and deformity	congenital anomalies
772.1	0.381273	1.36876	2.11605	0.62146	0.410337	695574	658	694916	Muscular wasting and disuse atrophy	symptoms
289.8	0.379841	0.732019	1.47651	-0.0124695	0.411497	662750	1189	661561	Polycythemia, secondary	hematopoietic
580.13	1.0027	0.439727	2.40502	-1.52557	0.412565	663136	219	662917	Acute glomerulonephritis, NOS	genitourinary
523.1	0.170386	0.870049	1.20401	0.536092	0.413929	702550	4075	698475	Gingivitis	digestive
426.91	0.188097	0.857584	1.22625	0.488913	0.414048	602000	7325	594675	Cardiac pacemaker in situ	circulatory system
756.5	0.579851	0.625225	1.76173	-0.511283	0.417975	728348	422	727926	Congenital osteodystrophies	congenital anomalies
727.2	0.356708	1.33488	2.03402	0.635728	0.418094	622839	901	621938	Bursitis disorders	musculoskeletal
743.12	0.26103	0.809762	1.32138	0.298143	0.418865	696825	3990	692835	Senile osteoporosis	musculoskeletal
245	0.137647	0.894705	1.16449	0.624918	0.418912	669831	5361	664470	Thyroiditis	endocrine/metabolic
348	0.0869125	1.0724	1.24275	0.902049	0.421269	654167	12762	641405	Other conditions of brain	neurological
613.7	0.231769	1.20148	1.65575	0.747213	0.428378	726731	1706	725025	Other signs and symptoms in breast	genitourinary
359	0.184036	0.864522	1.22523	0.503811	0.428924	718691	4611	714080	Muscular dystrophies and other myopathies	neurological
691	0.251562	0.820445	1.31351	0.327384	0.431447	680153	1836	678317	Congenital anomalies of skin	dermatologic
535.6	0.336267	1.30162	1.9607	0.642534	0.433086	702501	639	701862	Duodenitis	digestive
249	0.225657	1.19338	1.63567	0.751091	0.433369	646127	2059	644068	Secondary diabetes mellitus	endocrine/metabolic
621	0.502418	0.676441	1.66118	-0.308299	0.436535	740354	662	739692	Endometrial hyperplasia	genitourinary
739	0.183964	0.866849	1.22742	0.50628	0.437318	682660	3197	679463	Contracture of joint	musculoskeletal
130.1	0.715089	1.73715	3.13872	0.335576	0.439951	729248	109	729139	Lyme disease	infectious diseases
694.1	0.502159	0.678866	1.6631	-0.305367	0.44051	678923	606	678317	Vitiligo	dermatologic
797.1	0.244593	1.20743	1.68683	0.728029	0.440916	740853	1837	739016	Cardiogenic shock	symptoms
750.22	0.381447	1.34136	2.089	0.593726	0.441345	717028	457	716571	Congenital anomaly of gallbladder, bile ducts, liver, pancreas	congenital anomalies
429.2	0.38126	1.34103	2.0883	0.593762	0.441504	683474	790	682684	Abnormal function study of cardiovascular system	circulatory system
374.1	0.502175	0.67974	1.664	-0.304523	0.442045	643156	1327	641829	Ectropion or entropion	sense organs
426.3	0.231465	0.837363	1.29104	0.383691	0.443175	598992	4317	594675	Bundle branch block	circulatory system
386.3	0.502318	0.682753	1.6673	-0.301791	0.44742	683010	669	682341	Labyrinthitis	sense organs
271.3	0.237644	1.19708	1.66286	0.731297	0.449079	747488	1855	745633	Intestinal disaccharidase deficiencies and disaccharide malabsorption	endocrine/metabolic
447.1	0.451142	1.40574	2.28998	0.521501	0.450314	694345	526	693819	Stricture of artery	circulatory system
348.4	0.31811	0.78689	1.41038	0.163395	0.451204	642518	1113	641405	Cerebral cysts	neurological
735.1	0.244063	0.832089	1.31045	0.353726	0.451359	681524	2061	679463	Flat foot	musculoskeletal
530.3	0.279142	0.810433	1.35755	0.263314	0.451465	596571	2253	594318	Stricture and stenosis of esophagus	digestive
586.12	0.216072	0.849944	1.27345	0.426442	0.451776	666847	3930	662917	Vesicoureteral reflux	genitourinary
601.3	0.260712	1.2152	1.72619	0.704199	0.45471	710447	1216	709231	Orchitis and epididymitis	genitourinary
250.12	0.252169	1.20702	1.70127	0.712772	0.455574	645592	1524	644068	Type 1 diabetes with renal manifestations	endocrine/metabolic
362.2	0.16788	0.882267	1.21131	0.553222	0.455589	698873	11702	687171	Degeneration of macula and posterior pole of retina	sense organs
259.3	0.304389	1.25469	1.85129	0.658089	0.456035	692994	887	692107	Delay in sexual development and puberty NEC	endocrine/metabolic
585.34	0.187768	1.15022	1.51825	0.782196	0.456054	667609	4692	662917	Chronic Kidney Disease, Stage IV	genitourinary
627.22	0.19869	1.15956	1.549	0.770132	0.456211	655326	2906	652420	Need for Hormone replacement therapy (postmenopausal)	genitourinary
727.4	0.166116	1.13156	1.45714	0.805967	0.456867	625385	3447	621938	Ganglion and cyst of synovium, tendon, and bursa	musculoskeletal
754.1	0.451472	1.39751	2.2824	0.512628	0.458487	728223	297	727926	Lumbosacral spondylolysis, congenital	congenital anomalies
433.12	0.579637	0.651249	1.78734	-0.484839	0.459372	693665	1390	692275	Cerebral atherosclerosis	circulatory system
426.21	0.356433	1.30175	2.00036	0.603139	0.45939	595609	934	594675	First degree AV block	circulatory system
480.12	0.279613	1.2297	1.77774	0.681653	0.45962	612155	1083	611072	Pseudomonal pneumonia	respiratory
728.2	0.35558	0.769785	1.46672	0.0728475	0.461837	622854	916	621938	Laxity of ligament or hypermobility syndrome	musculoskeletal
250.15	1.00269	0.479388	2.44467	-1.48589	0.463393	644397	329	644068	Diabetes type 1 with peripheral circulatory disorders	endocrine/metabolic
741.3	0.132853	1.1019	1.36229	0.841508	0.465143	672961	6704	666257	Difficulty in walking	musculoskeletal
750.21	0.33545	0.784715	1.4422	0.127233	0.469856	717809	1238	716571	Congenital anomalies of intestine	congenital anomalies
346	0.502362	0.69592	1.68055	-0.288709	0.470521	642011	606	641405	Abnormal findings on study of brain and/or nervous system	neurological
426.32	0.335622	0.785104	1.44292	0.127285	0.47099	597387	2712	594675	Left bundle branch block	circulatory system
364.2	0.502204	0.696751	1.68107	-0.287569	0.471844	691392	948	690444	Corneal edema	sense organs
601.8	0.451074	1.38298	2.26708	0.498874	0.472253	709640	409	709231	Other inflammatory disorders of male genital organs	genitourinary
535.1	0.336089	1.27307	1.9318	0.614336	0.472538	702574	712	701862	Acute gastritis	digestive
377	0.161513	0.890498	1.20706	0.573934	0.472727	657555	3975	653580	Disorders of optic nerve and visual pathways	sense organs
519.1	0.356492	1.29136	1.99008	0.592636	0.473216	712632	607	712025	Tracheostomy complications	respiratory
519.8	0.237235	0.845235	1.31022	0.380255	0.47848	713989	1964	712025	Other diseases of respiratory system, NEC	respiratory
250.41	0.184427	1.13812	1.4996	0.776644	0.482981	647507	3439	644068	Impaired fasting glucose	endocrine/metabolic
342	0.20998	0.863075	1.27464	0.451514	0.483134	644577	3172	641405	Hemiplegia	neurological
759.1	0.70997	0.609859	2.0014	-0.781682	0.486086	728248	310	727938	Anomalies of endocrine glands, congenital	congenital anomalies
854	0.168268	1.1241	1.4539	0.794292	0.486928	702529	3580	698949	Complications of cardiac/vascular device, implant, and graft	injuries & poisonings
528.6	0.582646	1.49853	2.64052	0.356546	0.487542	721262	307	720955	Leukoplakia of oral mucosa	digestive
250.25	0.28003	1.21379	1.76265	0.664935	0.489005	646275	2207	644068	Diabetes type 2 with peripheral circulatory disorders	endocrine/metabolic
366.2	0.0768426	0.948481	1.09909	0.797869	0.49124	724990	40428	684562	Senile cataract	sense organs
855	0.197927	1.14578	1.53372	0.757847	0.491722	700908	1959	698949	Complication of nervous system device, implant, and graft	injuries & poisonings
440.2	0.215466	1.15895	1.58126	0.736636	0.493579	697698	3879	693819	Atherosclerosis of the extremities	circulatory system
379.4	0.449601	0.735207	1.61643	-0.146011	0.493868	654200	620	653580	Anomalies of pupillary function	sense organs
246.2	0.714663	1.63056	3.0313	0.229818	0.493894	664596	126	664470	Thyroid cyst	endocrine/metabolic
599.8	0.303926	1.23104	1.82673	0.635341	0.494036	628141	1123	627018	Other symptoms involving urinary system	genitourinary
279.2	1.00333	0.503545	2.47008	-1.46299	0.4941	723830	176	723654	Autoimmune disease NEC	endocrine/metabolic
555.21	0.259884	0.837385	1.34676	0.328013	0.49468	620891	1701	619190	Ulcerative colitis (chronic)	digestive
369.2	0.23136	1.16965	1.62312	0.716189	0.498194	643576	1747	641829	Eye infection, viral	sense organs
586.1	0.21136	0.866824	1.28109	0.452557	0.49892	666886	3969	662917	Anatomical abnormatilies of kidney and ureters	genitourinary
623	0.31823	0.809333	1.43306	0.185602	0.506209	740873	1181	739692	Hypertrophy of female genital organs	genitourinary
519	0.111706	0.928613	1.14756	0.709669	0.507319	721264	9239	712025	Other diseases of respiratory system, not elsewhere classified	respiratory
588	0.159896	1.11155	1.42494	0.798151	0.508366	668310	5393	662917	Disorders resulting from impaired renal function	genitourinary
441.1	0.449445	0.743397	1.62431	-0.137515	0.509408	694478	659	693819	Acute vascular insufficiency of intestine	circulatory system
425	0.112137	0.928909	1.1487	0.709119	0.510777	732845	13469	719376	Cardiomyopathy	circulatory system
287.31	0.279052	0.833135	1.38008	0.286192	0.512974	682799	1420	681379	Primary thrombocytopenia	hematopoietic
255.1	0.303324	0.820309	1.41482	0.225794	0.51375	693475	1368	692107	Adrenal hyperfunction	endocrine/metabolic
594.3	0.15775	1.10832	1.41751	0.799132	0.514426	720471	3701	716770	Calculus of ureter	genitourinary
530.2	0.201972	1.13987	1.53574	0.744007	0.516861	597012	2694	594318	Esophageal bleeding (varices/hemorrhage)	digestive
332	0.279781	0.8343	1.38267	0.285929	0.5173	645653	4248	641405	Parkinson's disease	neurological
283.2	0.451118	1.33912	2.22331	0.45493	0.51743	628319	331	627988	Non-autoimmune hemolytic anemias	hematopoietic
612.2	0.194215	1.13366	1.51432	0.752997	0.518325	702586	2536	700050	Hypertrophy of breast (Gynecomastia)	genitourinary
255	0.131634	1.08847	1.34647	0.830465	0.519581	697582	5475	692107	Disorders of adrenal glands	endocrine/metabolic
440.21	0.380901	1.27662	2.02319	0.530054	0.521423	694942	1123	693819	Atherosclerosis of native arteries of the extremities with ulceration or gangrene	circulatory system
427.21	0.0935469	1.06174	1.24509	0.878389	0.521893	626143	31468	594675	Atrial fibrillation	circulatory system
278.4	0.0960788	1.06338	1.25169	0.875061	0.522457	647789	10558	637231	Abnormal weight gain	endocrine/metabolic
530.6	0.713223	1.57421	2.97213	0.176294	0.524644	594598	280	594318	Diverticulum of esophagus, acquired	digestive
743	0.0713618	1.04637	1.18624	0.906497	0.525349	721612	28777	692835	Osteoporosis, osteopenia and pathological fracture	musculoskeletal
270.12	1.00371	0.532114	2.49938	-1.43515	0.529633	728711	164	728547	Phenylketonuria [PKU]	endocrine/metabolic
416	0.0870999	0.946837	1.11755	0.776121	0.530532	708239	18812	689427	Cardiomegaly	circulatory system
362.1	0.357255	1.25022	1.95044	0.550001	0.531906	688751	1580	687171	Retinopathy of prematurity	sense organs
411.41	0.451139	1.32573	2.20996	0.441499	0.531967	654849	411	654438	Aneurysm and dissection of heart	circulatory system
240	0.21019	0.877263	1.28924	0.465289	0.533284	667237	2767	664470	Simple and unspecified goiter	endocrine/metabolic
362.6	0.410346	0.774432	1.57871	-0.0298468	0.533317	688127	956	687171	Peripheral retinal degenerations	sense organs
426.7	0.230997	0.866608	1.31936	0.413853	0.5354	597207	2532	594675	Abnormal electrocardiogram [ECG] [EKG]	circulatory system
525.2	0.714037	1.55149	2.951	0.15198	0.538477	698623	148	698475	Atrophy of edentulous alveolar ridge	digestive
627.3	0.167483	1.1085	1.43676	0.780233	0.538537	658079	5659	652420	Postmenopausal atrophic vaginitis	genitourinary
618	0.156766	1.10106	1.40833	0.793803	0.53912	745845	5646	740199	Genital prolapse	genitourinary
327.31	0.502408	0.73534	1.72006	-0.24938	0.540605	640686	587	640099	Central/nonobstroctive sleep apnea	neurological
737.3	0.0977337	1.06151	1.25307	0.869953	0.541349	688067	8604	679463	Kyphoscoliosis and scoliosis	musculoskeletal
386.1	0.29057	0.838127	1.40764	0.26861	0.543374	684256	1915	682341	Meniere's disease	sense organs
818.1	0.25203	1.16441	1.65838	0.670429	0.545882	719594	1497	718097	Subdural hemorrhage (injury)	injuries & poisonings
132	0.269492	1.17623	1.70443	0.648024	0.54698	730494	1355	729139	Infestation (lice, mites)	infectious diseases
41.8	0.502108	0.739223	1.72335	-0.244908	0.547324	689883	710	689173	H. pylori	infectious diseases
216.1	0.710215	0.652318	2.04434	-0.739704	0.54748	697151	292	696859	Screening for malignant neoplasms of the skin	neoplasms
565.1	0.579971	0.70795	1.84469	-0.428794	0.551498	696683	533	696150	Anal and rectal polyp	digestive
711.2	0.713747	1.52712	2.92606	0.128172	0.55306	684456	139	684317	Reiter's disease	musculoskeletal
290.13	1.01153	0.548817	2.53142	-1.43379	0.553081	669525	1363	668162	Senile dementia	mental disorders
426.8	0.318925	1.20802	1.83312	0.58293	0.553468	595519	844	594675	Other cardiac conduction disorders	circulatory system
704.12	0.502579	0.743312	1.72837	-0.241742	0.555034	712553	601	711952	Telogen effluvium	dermatologic
446.9	0.336189	1.21934	1.87827	0.560409	0.555275	694650	831	693819	Arteritis NOS	circulatory system
783.1	0.503939	1.34342	2.33115	0.355705	0.55799	613275	317	612958	Postprocedural fever	symptoms
756.22	0.582718	1.40478	2.54691	0.262652	0.559714	728157	231	727926	Pectus carinatum	congenital anomalies
580.32	0.318015	0.830703	1.45401	0.207393	0.559724	664164	1247	662917	Nephritis and nephropathy with pathological lesion	genitourinary
218	0.142047	0.921099	1.19951	0.642687	0.56286	714450	6647	707803	Benign neoplasm of uterus	neoplasms
8.6	0.219899	0.880744	1.31175	0.449741	0.563613	724731	3002	721729	Viral Enteritis	infectious diseases
530.5	0.410462	0.790486	1.59499	-0.0140202	0.56679	595366	1048	594318	Disorders of esophageal motility	digestive
452.1	1.00337	0.563241	2.52984	-1.40336	0.56724	670555	250	670305	Iatrogenic pulmonary embolism and infarction	circulatory system
709.3	0.50252	0.750426	1.73537	-0.234512	0.567764	674061	713	673348	Systemic sclerosis	dermatologic
275.5	0.132597	0.927107	1.187	0.667217	0.568136	724749	6467	718282	Disorders of calcium/phosphorus metabolism	endocrine/metabolic
733.2	0.30404	1.18946	1.78538	0.593541	0.568241	650383	830	649553	Cyst of bone	musculoskeletal
323	0.355497	0.816589	1.51336	0.119816	0.568705	742450	953	741497	Encephalitis	neurological
440.1	0.502349	0.751065	1.73567	-0.233539	0.568781	695012	1193	693819	Atherosclerosis of renal artery	circulatory system
624.9	0.156479	1.09266	1.39936	0.785962	0.571181	713370	5087	708283	stress incontinence, female	genitourinary
523.32	0.713352	1.4946	2.89277	0.0964307	0.573204	698646	171	698475	Chronic periodontitis	digestive
117.1	0.379989	0.807327	1.5521	0.0625494	0.573268	677497	1005	676492	Histoplasmosis	infectious diseases
754	0.244612	1.14727	1.62671	0.667834	0.574347	729237	1311	727926	Congenital musculoskeletal deformities of spine	congenital anomalies
246	0.225332	0.881256	1.32291	0.439605	0.57481	667102	2632	664470	Other disorders of thyroid	endocrine/metabolic
401.22	0.121896	1.07068	1.3096	0.831764	0.575295	555341	13328	542013	Hypertensive chronic kidney disease	circulatory system
687	0.225135	0.881731	1.323	0.440466	0.576109	645780	2669	643111	Symptoms affecting skin	dermatologic
528.4	0.710121	0.675309	2.06715	-0.716528	0.580371	721230	275	720955	Cysts of oral soft tissues	digestive
246.7	0.335345	0.831057	1.48833	0.17378	0.581059	665451	981	664470	Abnormal results of function study of thyroid	endocrine/metabolic
627.21	0.252591	1.14918	1.64426	0.654101	0.581986	654161	1741	652420	Symptomatic artificial menopause	genitourinary
278.11	0.074683	1.04196	1.18833	0.895577	0.582099	657175	19944	637231	Morbid obesity	endocrine/metabolic
723	0.181299	1.10364	1.45898	0.748292	0.586498	658207	3182	655025	Other disorders of cervical region	musculoskeletal
480.2	0.380712	1.22908	1.97528	0.482886	0.58796	611727	655	611072	Viral pneumonia	respiratory
703	0.260294	1.14919	1.65937	0.639016	0.593176	713722	1770	711952	Diseases of nail, NOS	dermatologic
394.1	0.380164	0.816841	1.56196	0.0717186	0.594609	668341	1871	666470	Mitral valve stenosis and aortic valve stenosis	circulatory system
602	1.00353	0.588366	2.55529	-1.37856	0.597125	709588	357	709231	Other disorders of prostate	genitourinary
323.2	0.713606	1.45798	2.85665	0.0593167	0.597236	741638	141	741497	Acute (transverse) myelitis	neurological
289.9	0.709988	0.688113	2.07969	-0.703465	0.598547	663711	351	663360	Abnormality of red blood cells	hematopoietic
656.2	0.24024	1.13455	1.60542	0.663678	0.599271	728530	7376	721154	Respiratory conditions of fetus and newborn	pregnancy complications
704.2	0.260103	0.872663	1.38246	0.362862	0.600515	713551	1599	711952	Hirsutism	dermatologic
612	0.178466	1.09592	1.44571	0.746125	0.607799	703074	3024	700050	Breast conditions, congenital or relating to hormones	genitourinary
327.6	0.710113	0.695051	2.08687	-0.696771	0.608461	640398	299	640099	Circadian rhythm sleep disorder	neurological
323.8	0.410436	0.810973	1.61543	0.00651828	0.609712	742207	710	741497	Encephalitis, non-infectious	neurological
743.2	0.168368	1.08889	1.41889	0.75889	0.613003	696431	3596	692835	Pathologic fracture	musculoskeletal
362.22	0.506552	1.28659	2.27944	0.293752	0.618851	688785	1614	687171	Macular degeneration, wet	sense organs
366.3	0.710282	0.704222	2.09638	-0.687932	0.621522	684827	265	684562	Traumatic cataract	sense organs
741.6	1.00395	0.609425	2.57716	-1.35831	0.621806	666431	174	666257	Villonodular synovitis	musculoskeletal
270	0.161484	0.923456	1.23997	0.606947	0.621925	733218	4671	728547	Disorders of protein plasma/amino-acid transport and metabolism	endocrine/metabolic
277.4	0.335944	1.18	1.83845	0.52155	0.622234	732147	788	731359	Disorders of bilirubin excretion	endocrine/metabolic
603	0.21056	0.901791	1.31449	0.489093	0.62347	691353	2428	688925	Other disorders of testis	genitourinary
245.2	0.152413	0.927943	1.22667	0.629214	0.623659	668608	4138	664470	Chronic thyroiditis	endocrine/metabolic
218.1	0.142063	0.93273	1.21117	0.654285	0.62399	714382	6579	707803	Uterine leiomyoma	neoplasms
447	0.210168	0.902243	1.31417	0.490313	0.624508	697100	3281	693819	Other disorders of arteries and arterioles	circulatory system
272	0.0412026	1.02028	1.10103	0.93952	0.626104	705844	109936	595908	Disorders of lipoid metabolism	endocrine/metabolic
386	0.137797	1.06916	1.33924	0.799078	0.627465	689329	6988	682341	Vertiginous syndromes and other disorders of vestibular system	sense organs
200.1	0.380947	1.20293	1.94959	0.456276	0.62767	691468	726	690742	Polycythemia vera	neoplasms
454	0.161733	1.08117	1.39817	0.764178	0.629399	674379	4074	670305	Varicose veins	circulatory system
380.4	0.0926761	1.0457	1.22735	0.86406	0.629644	714770	12571	702199	Impacted cerumen	sense organs
741.1	0.450763	1.24262	2.12611	0.359121	0.629882	666704	447	666257	Ankylosis of joint	musculoskeletal
428	0.0730522	0.965647	1.10883	0.822464	0.632277	715708	33024	682684	Congestive heart failure; nonhypertensive	circulatory system
622.2	0.411812	1.21776	2.02491	0.410604	0.632368	740208	516	739692	Mucous polyp of cervix	genitourinary
379.9	0.251707	0.886646	1.37999	0.393301	0.632668	655395	1815	653580	Pain, swelling or discharge of eye	sense organs
619.1	0.244733	1.12229	1.60197	0.642617	0.637334	717080	1475	715605	Noninflammatory disorders of ovary, fallopian tube, and broad ligament	genitourinary
253.3	0.410592	0.824746	1.62951	0.0199855	0.638874	692741	634	692107	Diabetes insipidus	endocrine/metabolic
610.3	0.450023	0.81099	1.69303	-0.071054	0.641552	700685	635	700050	Fibrosclerosis of breast	genitourinary
362.7	0.355667	0.847695	1.5448	0.150588	0.642236	688139	968	687171	Hereditary retinal dystrophies	sense organs
300.13	0.580539	1.30803	2.44589	0.170175	0.643693	557039	362	556677	Phobia	mental disorders
278.3	0.335482	0.85659	1.51413	0.199046	0.644502	638376	1145	637231	Localized adiposity	endocrine/metabolic
724.9	0.41135	1.20855	2.01479	0.402299	0.645173	655641	616	655025	Other unspecified back disorders	musculoskeletal
750.2	0.251838	0.891664	1.38527	0.398062	0.648883	718250	1679	716571	Lower gastrointestinal congenital anomalies	congenital anomalies
735	0.104557	0.953581	1.15851	0.748649	0.6494	690716	11253	679463	Acquired foot deformities	musculoskeletal
694	0.126445	0.944302	1.19213	0.696471	0.65038	685815	7498	678317	Dyschromia and Vitiligo	dermatologic
364.9	0.58003	0.769166	1.90602	-0.367692	0.650927	691011	567	690444	Cornea replaced by transplant	sense organs
447.7	0.290665	0.878015	1.44772	0.308313	0.654467	695450	1631	693819	Aortic ectasia	circulatory system
425.11	0.38011	0.843571	1.58859	0.0985564	0.654492	720342	966	719376	Hypertrophic obstructive cardiomyopathy	circulatory system
701.1	0.579903	0.77153	1.90814	-0.36508	0.654672	702462	685	701777	Keratoderma, acquired	dermatologic
362.26	0.260386	0.890323	1.40068	0.379966	0.65549	690904	3733	687171	Macular puckering of retina	sense organs
709	0.15247	0.934343	1.23318	0.635501	0.656021	678770	5422	673348	Diffuse diseases of connective tissue	dermatologic
245.21	0.15242	0.934457	1.2332	0.635713	0.656496	668579	4109	664470	Chronic lymphocytic thyroiditis	endocrine/metabolic
353.1	0.380125	0.844674	1.58972	0.0996296	0.656987	695425	794	694631	Nerve plexus lesions	neurological
709.7	0.355845	0.854326	1.55178	0.156871	0.658167	674252	904	673348	Unspecified diffuse connective tissue disease	dermatologic
480.3	0.410922	1.199	2.0044	0.393592	0.658737	611752	680	611072	Pneumonia due to fungus (mycoses)	respiratory
270.34	0.710642	0.733422	2.12628	-0.659437	0.662639	728802	255	728547	Alpha-1-antitrypsin deficiency	endocrine/metabolic
433.32	1.00386	0.646068	2.61363	-1.32149	0.663438	692438	163	692275	Moyamoya disease	circulatory system
370.2	0.502568	0.804584	1.78962	-0.18045	0.665277	642467	638	641829	Superficial keratitis	sense organs
227.1	0.356377	1.16536	1.86386	0.466858	0.667635	738126	818	737308	Benign neoplasm of adrenal gland	neoplasms
557.1	0.260104	0.895308	1.40511	0.385503	0.670714	620510	1320	619190	Celiac disease	digestive
656.26	0.432613	1.19926	2.04718	0.351341	0.67447	724129	2975	721154	Transitory tachypnea or apnea of newborn	pregnancy complications
381.3	0.335274	0.869234	1.52637	0.212097	0.675951	629148	981	628167	Mastoiditis & related conditions	sense organs
442.4	0.502717	0.810512	1.79584	-0.174814	0.676016	694338	519	693819	Arterial dissection	circulatory system
134	0.710365	0.744649	2.13696	-0.647665	0.6781	729438	299	729139	Helminthiases	infectious diseases
627.5	0.410776	0.843495	1.64862	0.0383738	0.678624	653143	723	652420	Premature menopause and other ovarian failure	genitourinary
756	0.170682	0.931962	1.2665	0.597425	0.679726	731398	3472	727926	Other congenital musculoskeletal anomalies	congenital anomalies
573.5	0.201486	0.920506	1.31542	0.525594	0.680996	691406	2663	688743	Jaundice (not of newborn)	digestive
372	0.231255	1.09967	1.55293	0.646413	0.68118	644157	2328	641829	Disorders of conjunctiva	sense organs
528.41	0.710427	0.747969	2.14041	-0.644468	0.682717	721203	248	720955	Cyst of the salivary gland	digestive
974	0.712112	1.33758	2.73332	-0.0581565	0.682942	664494	219	664275	Poisoning by water, mineral, and uric acid metabolism drugs	injuries & poisonings
411.3	0.123051	1.05139	1.29257	0.810204	0.683849	667159	12721	654438	Angina pectoris	circulatory system
428.4	0.147782	0.942053	1.23171	0.652399	0.686262	691616	8932	682684	Heart failure with preserved EF [Diastolic heart failure]	circulatory system
527.2	0.29088	1.12436	1.69449	0.554235	0.686976	722055	1100	720955	Sialoadenitis	digestive
599.4	0.0956456	0.962243	1.14971	0.774777	0.687384	640603	13585	627018	Urinary incontinence	genitourinary
735.21	0.225714	1.09507	1.53747	0.652673	0.687411	682867	3404	679463	Hammer toe (acquired)	musculoskeletal
386.2	0.1759	1.07322	1.41798	0.728452	0.687902	686830	4489	682341	Peripheral or central vertigo	sense organs
384.1	0.710264	0.753571	2.14569	-0.638546	0.690373	628433	266	628167	Myringitis	sense organs
255.13	0.713111	1.32591	2.72361	-0.071785	0.692406	692286	179	692107	Medulloadrenal hyperfunction	endocrine/metabolic
350.5	1.00436	0.672988	2.64153	-1.29555	0.693352	697338	160	697178	Abnormal reflex	neurological
361.2	1.00408	0.673985	2.64197	-1.294	0.69436	690623	179	690444	Retinoschisis and retinal cysts	sense organs
426.22	1.00489	0.675206	2.64478	-1.29437	0.695924	594931	256	594675	Mobitz II AV block	circulatory system
782.6	0.303613	0.889467	1.48455	0.294385	0.699646	690627	1217	689410	Pallor and flushing	symptoms
701.6	0.252207	1.10186	1.59618	0.607531	0.700539	703797	2020	701777	Acquired acanthosis nigricans	dermatologic
394.2	0.291084	1.11779	1.68832	0.547268	0.70205	667804	1334	666470	Mitral valve disease	circulatory system
624.1	1.00431	0.681129	2.64958	-1.28733	0.702198	708497	214	708283	Dystrophy of female genital tract	genitourinary
244	0.0521882	1.01993	1.12222	0.917641	0.705335	708021	43551	664470	Hypothyroidism	endocrine/metabolic
586.2	0.187518	1.07285	1.44039	0.705317	0.707658	667046	4129	662917	Cyst of kidney, acquired	genitourinary
743.22	0.449805	0.847003	1.72862	-0.0346136	0.712007	693512	677	692835	Pathologic fracture of femur	musculoskeletal
580.4	0.502479	0.831769	1.81663	-0.153091	0.71393	663542	625	662917	Renal sclerosis, NOS	genitourinary
258	0.712768	1.29522	2.69225	-0.101801	0.716659	692280	173	692107	Iatrogenic endocrine disorders	endocrine/metabolic
694.2	0.132797	0.953192	1.21347	0.692911	0.718103	685178	6861	678317	Other dyschromia	dermatologic
962.1	0.356012	1.13658	1.83437	0.438798	0.719139	665046	771	664275	Adrenal cortical steroids causing adverse effects in therapeutic use	injuries & poisonings
364.5	0.410743	0.862797	1.66785	0.0577404	0.719379	692021	1577	690444	Corneal dystrophy	sense organs
333.8	0.710221	0.77632	2.16835	-0.615713	0.72147	641944	539	641405	Other degenerative diseases of the basal ganglia	neurological
575.9	0.581801	1.2302	2.37052	0.0898655	0.721774	722679	300	722379	Nonspecific abnormal findings on radiological and other examination of biliary tract	digestive
500	0.41128	1.15768	1.96378	0.351566	0.721844	651125	645	650480	Lung disease due to external agents	respiratory
292.1	0.128348	0.955477	1.20704	0.703915	0.722698	675576	7414	668162	Aphasia/speech disturbance	mental disorders
433.8	0.175785	0.939588	1.28413	0.595048	0.722972	698089	5814	692275	Late effects of cerebrovascular disease	circulatory system
580	0.161561	0.944519	1.26118	0.627859	0.723866	667877	4960	662917	Nephritis; nephrosis; renal sclerosis	genitourinary
383	0.502743	0.837793	1.82317	-0.147583	0.724811	628685	518	628167	Otosclerosis	sense organs
458.2	0.450312	1.17036	2.05298	0.287752	0.726829	694566	666	693900	Iatrogenic hypotension	circulatory system
585.31	0.18747	0.93662	1.30406	0.56918	0.726888	667702	4785	662917	Renal dialysis	genitourinary
272.1	0.0413218	1.01444	1.09543	0.933451	0.728601	705737	109829	595908	Hyperlipidemia	endocrine/metabolic
364.51	0.502686	0.839941	1.82521	-0.145325	0.728604	691636	1192	690444	Fuchs' dystrophy	sense organs
452.8	1.00438	0.705858	2.67444	-1.26272	0.728725	670478	173	670305	Postphlebitic syndrome	circulatory system
374.2	0.580396	0.817704	1.95528	-0.319871	0.728776	642239	410	641829	Lagophthalmos	sense organs
242.31	1.00462	0.706308	2.67537	-1.26275	0.729265	664626	156	664470	Thyrotoxic exophthalmos	endocrine/metabolic
277.6	1.00463	0.709044	2.67812	-1.26003	0.732161	731481	122	731359	Other deficiencies of circulating enzymes	endocrine/metabolic
245.1	0.710862	0.784212	2.1775	-0.609078	0.732392	664719	249	664470	Thyroiditis, acute and subacute	endocrine/metabolic
333.1	0.225494	0.925981	1.36795	0.484014	0.733076	645019	3614	641405	Essential tremor	neurological
690	0.168085	0.945134	1.27458	0.615686	0.737086	682536	4219	678317	Erythematosquamous dermatosis	dermatologic
389.5	0.449839	0.861935	1.74362	-0.0197506	0.741183	678121	572	677549	Disorders of acoustic nerve	sense organs
618.1	0.185057	1.06253	1.42524	0.69982	0.743093	744455	4256	740199	Prolapse of vaginal walls	genitourinary
270.1	0.356364	1.12343	1.8219	0.424955	0.743977	729158	611	728547	Disturbances of amino-acid transport	endocrine/metabolic
441	0.260252	1.08846	1.59856	0.578366	0.74465	695257	1438	693819	Vascular insufficiency of intestine	circulatory system
221	0.580702	0.830495	1.96867	-0.30768	0.749088	695139	353	694786	Benign neoplasm of other female genital organs	neoplasms
394.3	1.00761	1.37787	3.35278	-0.597048	0.750397	666595	125	666470	Aortic valve disease	circulatory system
738	0.11853	1.03813	1.27044	0.805807	0.752249	687350	7887	679463	Other acquired musculoskeletal deformity	musculoskeletal
736.4	0.502793	0.853521	1.839	-0.131954	0.752754	679988	525	679463	Genu valgum or varum (acquired)	musculoskeletal
446.3	0.712913	1.25069	2.648	-0.146615	0.753687	693996	177	693819	Hypersensitivity angiitis	circulatory system
622	0.220397	1.07154	1.50352	0.639561	0.753893	741812	2120	739692	Polyp of female genital organs	genitourinary
709.4	0.581446	1.19967	2.3393	0.0600315	0.754214	673704	356	673348	Polymyositis	dermatologic
272.12	0.19435	1.0622	1.44312	0.681271	0.756204	598685	2777	595908	Hyperglyceridemia	endocrine/metabolic
728.1	0.710485	0.802456	2.19501	-0.590095	0.756746	622222	284	621938	Muscular calcification and ossification	musculoskeletal
250	0.0474283	0.98551	1.07847	0.892551	0.758281	713379	69311	644068	Diabetes mellitus	endocrine/metabolic
695.81	0.582008	1.19513	2.33587	0.0543995	0.759389	678549	232	678317	Erythema nodosum	dermatologic
376	0.580679	0.837222	1.97535	-0.30091	0.759632	653900	320	653580	Disorders of the orbit	sense organs
370.1	0.269327	1.08585	1.61373	0.557965	0.75976	643224	1395	641829	Corneal ulcer	sense organs
198	44.0728	1.76609e-06	86.3826	-86.3826	0.763746	684729	13848	670881	Secondary malignant neoplasm	neoplasms
690.1	0.168091	0.950744	1.2802	0.621285	0.763799	682505	4188	678317	Seborrheic dermatitis	dermatologic
255.11	0.38105	1.12088	1.86774	0.374027	0.764571	692690	583	692107	Cushing's syndrome	endocrine/metabolic
253.11	0.710788	0.808912	2.20206	-0.584233	0.765434	692346	239	692107	Acromegaly and gigantism	endocrine/metabolic
736.5	1.00474	0.742162	2.71146	-1.22714	0.766635	679600	137	679463	Acquired deformities of knee	musculoskeletal
386.21	0.449818	0.876262	1.7579	-0.00538027	0.769024	683158	817	682341	Central origin vertigo	sense organs
443.8	0.580339	0.843854	1.98132	-0.29361	0.769869	694421	602	693819	Other specified peripheral vascular diseases	circulatory system
274	0.138157	0.961036	1.23182	0.690248	0.773603	741880	10204	731676	Gout and other crystal arthropathies	endocrine/metabolic
622.1	0.252352	1.07488	1.56949	0.58027	0.774766	741319	1627	739692	Polyp of corpus uteri	genitourinary
259.4	0.252696	1.07477	1.57005	0.579484	0.77538	694415	2308	692107	Precocious sexual development and puberty NEC	endocrine/metabolic
198.1	44.2581	3.32726e-06	86.7458	-86.7458	0.775647	677820	6939	670881	Secondary malignancy of lymph nodes	neoplasms
274.2	0.710177	0.817382	2.20933	-0.574564	0.776455	732213	537	731676	Crystal arthropathies	endocrine/metabolic
580.3	0.197751	1.05757	1.44516	0.669981	0.777127	665932	3015	662917	Nephritis and nephropathy without mention of glomerulonephritis	genitourinary
446	0.205834	1.05888	1.46232	0.655446	0.781044	696077	2258	693819	Polyarteritis nodosa and allied conditions	circulatory system
695.22	1.00406	0.758696	2.72665	-1.20926	0.783288	678567	250	678317	Pemphigus and pemphigoid	dermatologic
286.5	0.410573	0.893229	1.69795	0.0885051	0.783307	682606	1227	681379	Hemorrhagic disorder due to intrinsic circulating anticoagulants	hematopoietic
772.3	0.0816968	0.977967	1.13809	0.817841	0.785076	711530	16614	694916	Muscle weakness	symptoms
781	0.184032	0.951676	1.31238	0.590973	0.787819	736314	3379	732935	Symptoms involving nervous and musculoskeletal systems	symptoms
426.31	0.303889	1.0852	1.68082	0.489579	0.787881	596133	1458	594675	Right bundle branch block	circulatory system
278	0.0472552	0.987396	1.08002	0.894776	0.788381	690195	52964	637231	Overweight, obesity and other hyperalimentation	endocrine/metabolic
612.3	1.00501	0.764281	2.73411	-1.20555	0.789101	700169	119	700050	Congenital anomalies of breast	genitourinary
274.1	0.140758	0.963067	1.23895	0.687182	0.789198	741443	9767	731676	Gout	endocrine/metabolic
911	0.710557	0.828378	2.22107	-0.564314	0.791023	748628	276	748352	Blister	injuries & poisonings
504	0.279505	1.07627	1.6241	0.528443	0.792567	652387	1907	650480	Other alveolar and parietoalveolar pneumonopathy	respiratory
285.22	48.3779	3.48426e-06	94.8207	-94.8207	0.795039	633311	5323	627988	Anemia in neoplastic disease	hematopoietic
333.4	0.201639	0.949248	1.34446	0.554035	0.796168	644580	3175	641405	Torsion dystonia	neurological
870.1	0.355596	0.912563	1.60953	0.215594	0.796941	670052	926	669126	Open wound or laceration of eye or eyelid	injuries & poisonings
601.4	0.580434	0.861903	1.99955	-0.275749	0.797922	709625	394	709231	Balanoposthitis	genitourinary
290.11	0.415528	1.11206	1.9265	0.29763	0.798242	671182	3020	668162	Alzheimer's disease	mental disorders
598	0.237497	1.06187	1.52736	0.596373	0.800458	746853	2126	744727	Abnormal findings on examination of urine	genitourinary
454.1	0.237545	0.941805	1.40739	0.476217	0.800729	672990	2685	670305	Varicose veins of lower extremity	circulatory system
585.33	0.132427	1.03351	1.29306	0.773949	0.80346	674009	11092	662917	Chronic Kidney Disease, Stage III	genitourinary
569.1	0.71254	1.1927	2.58927	-0.203884	0.804671	696338	188	696150	Toxic gastroenteritis and colitis	digestive
713.5	0.502689	0.883746	1.86902	-0.101525	0.805799	685046	729	684317	Arthropathy associated with neurological disorders	musculoskeletal
687.3	0.581298	1.1528	2.29215	0.0134577	0.806753	643427	316	643111	Changes in skin texture	dermatologic
430.1	0.251961	1.06295	1.55679	0.569103	0.808564	694144	1869	692275	Subarachnoid hemorrhage	circulatory system
711.3	0.711183	0.842211	2.23613	-0.551707	0.809196	684519	202	684317	Behcet's syndrome	musculoskeletal
346.2	0.581674	1.15032	2.2904	0.010242	0.809743	641636	231	641405	Nonspecific abnormal results of function study of brain and central nervous system	neurological
269	0.133843	1.03263	1.29496	0.770294	0.810427	735055	6508	728547	Proteinuria	endocrine/metabolic
10	0.579917	0.870584	2.00722	-0.266054	0.811117	689722	549	689173	Tuberculosis	infectious diseases
420.22	0.450386	1.11346	1.99621	0.2307	0.811402	719933	557	719376	Chronic pericarditis	circulatory system
574.12	0.214967	1.05248	1.47381	0.631142	0.811936	724614	2235	722379	Cholelithiasis with other cholecystitis	digestive
283	0.318457	1.07655	1.70073	0.452376	0.816829	629007	1019	627988	Acquired hemolytic anemias	hematopoietic
580.11	0.503463	1.12331	2.1101	0.136526	0.817341	663278	361	662917	Proliferative glomerulonephritis	genitourinary
270.3	0.193984	0.956488	1.3367	0.57628	0.81861	732227	3680	728547	Disorders of plasma protein metabolism	endocrine/metabolic
736	0.161638	1.03746	1.35427	0.720648	0.820027	682878	3415	679463	Other acquired deformities of limbs	musculoskeletal
278.1	0.0512352	1.0117	1.11212	0.911279	0.820393	681495	44264	637231	Obesity	endocrine/metabolic
271	0.225298	1.05248	1.49406	0.610893	0.82041	747819	2186	745633	Disorders of carbohydrate transport and metabolism	endocrine/metabolic
427.41	0.380304	0.918318	1.66371	0.172923	0.822709	595850	1175	594675	Ventricular fibrillation and flutter	circulatory system
700	0.318344	0.932087	1.55604	0.308132	0.825154	703725	1948	701777	Corns and callosities	dermatologic
597.2	0.450385	1.10146	1.98421	0.218705	0.830109	705207	548	704659	Urinary complications NEC	genitourinary
735.3	0.215092	0.955159	1.37674	0.533579	0.831098	682507	3044	679463	Hallux valgus (Bunion)	musculoskeletal
496.3	0.251789	0.947754	1.44126	0.454248	0.831237	632167	1958	630209	Bronchiectasis	respiratory
185	61.4115	2.6182e-06	120.366	-120.366	0.834219	718377	9146	709231	Cancer of prostate	neoplasms
31	0.503342	1.11057	2.09712	0.124022	0.834949	689580	407	689173	Diseases due to other mycobacteria	infectious diseases
857	0.580417	0.88657	2.02419	-0.251047	0.835674	699421	472	698949	Mechanical complication of unspecified genitourinary device, implant, and graft	injuries & poisonings
743.9	0.10686	0.978185	1.18763	0.76874	0.836476	705908	13073	692835	Osteopenia or other disorder of bone and cartilage	musculoskeletal
433.1	0.168942	0.965881	1.29701	0.634755	0.837197	700665	8390	692275	Occlusion and stenosis of precerebral arteries	circulatory system
727.8	0.318391	0.937122	1.56117	0.313077	0.838379	622896	958	621938	Plica syndrome	musculoskeletal
275.53	0.190553	1.03962	1.41311	0.666137	0.838419	721131	2849	718282	Disorders of phosphorus metabolism	endocrine/metabolic
288.3	0.303716	1.06237	1.65766	0.46709	0.842095	664491	1131	663360	Eosinophilia	hematopoietic
939.1	1.00741	1.221	3.19552	-0.753514	0.842886	624948	116	624832	Contact and allergic dermatitis of eyelid	dermatologic
274.21	0.710381	0.872031	2.26438	-0.520316	0.847149	732177	501	731676	Chondrocalcinosis	endocrine/metabolic
575.2	0.303705	1.06013	1.65539	0.464866	0.847539	723590	1211	722379	Obstruction of bile duct	digestive
284.2	1.00504	0.825326	2.79521	-1.14456	0.848515	628103	115	627988	Constitutional aplastic anemia	hematopoietic
427.8	0.195949	0.96334	1.3474	0.579279	0.848835	602637	7962	594675	Sinoatrial node dysfunction (Bradycardia)	circulatory system
217.1	0.303773	0.943752	1.53915	0.348356	0.848857	698101	1242	696859	Nevus, non-neoplastic	neoplasms
223	0.581616	1.11652	2.25649	-0.0234484	0.849701	639269	343	638926	Benign neoplasm of kidney and other urinary organs	neoplasms
189	69.2694	2.03788e-06	135.768	-135.768	0.849961	747135	6160	740975	Cancer of urinary organs (incl. kidney and bladder)	neoplasms
172.21	70.4753	1.73761e-06	138.132	-138.132	0.850725	692881	6691	686190	Basal cell carcinoma	neoplasms
202.2	71.958	1.78235e-06	141.038	-141.038	0.854043	735932	4738	731194	Non-Hodgkins lymphoma	neoplasms
165	69.7266	2.70213e-06	136.664	-136.664	0.854106	746519	4998	741521	Cancer within the respiratory system	neoplasms
165.1	69.6783	2.76815e-06	136.569	-136.569	0.854278	746448	4927	741521	Cancer of bronchus; lung	neoplasms
601.12	0.580822	0.898959	2.03737	-0.239451	0.854491	709692	461	709231	Chronic prostatitis	genitourinary
611.1	0.12075	0.978161	1.21483	0.741492	0.854903	708410	8360	700050	Abnormal mammogram	genitourinary
706.8	0.318255	0.943487	1.56727	0.319708	0.854966	695902	1465	694437	Other specified diseases of sebaceous glands	dermatologic
149	69.7457	3.19011e-06	136.701	-136.701	0.856013	744258	3621	740637	Cancer of larynx, pharynx, nasal cavities	neoplasms
193	71.9422	2.19971e-06	141.007	-141.007	0.856306	740610	3302	737308	Thyroid cancer	neoplasms
195.1	73.4107	1.69428e-06	143.885	-143.885	0.856358	675434	4553	670881	Malignant neoplasm, other	neoplasms
189.1	70.3978	2.93423e-06	137.98	-137.98	0.8564	744614	3639	740975	Cancer of kidney and renal pelvis	neoplasms
713	0.35603	1.06643	1.76425	0.368615	0.856636	685334	1017	684317	Arthropathy associated with other disorders classified elsewhere	musculoskeletal
440.22	0.303712	0.946765	1.54204	0.351489	0.857059	696106	2287	693819	Atherosclerosis of native arteries of the extremities with intermittent claudication	circulatory system
170	72.5319	2.13405e-06	142.163	-142.163	0.857134	747301	3383	743918	Cancer of bone and connective tissue	neoplasms
433.11	0.318581	1.05903	1.68345	0.434607	0.85714	693812	1537	692275	Occlusion of cerebral arteries, with cerebral infarction	circulatory system
189.11	70.5282	3.22666e-06	138.235	-138.235	0.85772	744206	3231	740975	Malignant neoplasm of kidney, except pelvis	neoplasms
172.22	68.8805	4.39907e-06	135.006	-135.006	0.857886	689727	3537	686190	Squamous cell carcinoma	neoplasms
172.11	72.0712	2.50669e-06	141.26	-141.26	0.857983	689737	3547	686190	Melanomas of skin	neoplasms
198.2	72.7799	2.28567e-06	142.649	-142.649	0.858356	674754	3873	670881	Secondary malignancy of respiratory organs	neoplasms
198.6	72.5251	2.56995e-06	142.149	-142.149	0.859133	674573	3692	670881	Secondary malignancy of bone	neoplasms
729.7	0.712056	1.1342	2.52983	-0.261428	0.859625	622113	175	621938	Nontraumatic compartment syndrome	musculoskeletal
380	0.3803	0.935183	1.68057	0.189795	0.860127	702918	719	702199	Disorders of external ear	sense organs
191.1	73.1127	2.63311e-06	143.301	-143.301	0.860514	738923	2296	736627	Cancer of brain and nervous system	neoplasms
170.2	72.5648	3.04315e-06	142.227	-142.227	0.861039	746279	2361	743918	Cancer of connective tissue	neoplasms
198.4	72.6602	3.05298e-06	142.414	-142.414	0.861254	673919	3038	670881	Secondary malignant neoplasm of liver	neoplasms
195.3	71.4501	3.79881e-06	140.042	-140.042	0.861332	673398	2517	670881	Malignant neoplasm of head, face, and neck	neoplasms
191.11	73.1103	2.92645e-06	143.296	-143.296	0.861645	738691	2064	736627	Cancer of brain	neoplasms
145	70.3306	4.84351e-06	137.848	-137.848	0.861862	742882	2245	740637	Cancer of mouth	neoplasms
990	73.3644	2.97409e-06	143.794	-143.794	0.862292	726154	3034	723120	Effects radiation NOS	injuries & poisonings
241.1	0.143182	1.02515	1.30578	0.744509	0.862301	670106	5636	664470	Nontoxic uninodular goiter	endocrine/metabolic
526.1	0.710879	0.884142	2.27746	-0.509181	0.862479	698698	223	698475	Cysts of the jaws	digestive
735.22	1.00545	0.840283	2.81097	-1.1304	0.862594	679603	140	679463	Claw toe (acquired)	musculoskeletal
443.7	0.503086	1.09022	2.07627	0.10417	0.863676	694570	751	693819	Peripheral angiopathy in diseases classified elsewhere	circulatory system
473.1	0.279384	1.04903	1.59662	0.501434	0.863978	543022	1739	541283	Chronic laryngitis	respiratory
360.3	0.710614	0.888541	2.28134	-0.504262	0.867922	690775	331	690444	Hypotony of eye	sense organs
454.11	0.269226	0.958122	1.48581	0.430439	0.873748	672374	2069	670305	Varicose veins of lower extremity, symptomtic	circulatory system
371.9	1.00506	0.853436	2.82335	-1.11648	0.874703	641964	135	641829	Chronic inflammatory disorders of orbit	sense organs
514.1	0.580683	0.912696	2.05083	-0.225443	0.874993	723618	389	723229	Abnormal results of function study of pulmonary system	respiratory
333	0.117803	1.01866	1.24955	0.787763	0.875315	650378	8973	641405	Extrapyramidal disease and abnormal movement disorders	neurological
427.2	0.092268	1.0142	1.19504	0.833352	0.878563	627129	32454	594675	Atrial fibrillation and flutter	circulatory system
709.5	0.411273	1.06484	1.87093	0.258743	0.878593	673902	554	673348	Dermatomyositis	dermatologic
253.1	0.251988	1.0388	1.53269	0.5449	0.879937	693582	1475	692107	Pituitary hyperfunction	endocrine/metabolic
350.6	0.410921	0.941135	1.74654	0.13573	0.882627	697969	791	697178	Disturbances of sensation of smell and taste	neurological
292.11	0.269088	0.961692	1.4891	0.434281	0.884584	670445	2283	668162	Aphasia	mental disorders
426.92	0.1984	0.972158	1.36102	0.583294	0.886825	599495	4820	594675	Cardiac defibrillator in situ	circulatory system
528.5	0.380602	1.05498	1.80096	0.309005	0.888159	721605	650	720955	Diseases of lips	digestive
362.9	0.279323	0.962077	1.50955	0.414603	0.889917	689504	2333	687171	Retinal edema	sense organs
362.21	0.414629	0.945884	1.75856	0.13321	0.893259	690332	3161	687171	Macular degeneration, dry	sense organs
283.21	0.711368	0.909688	2.30397	-0.484594	0.894147	628184	196	627988	Hemolytic-uremic syndrome	hematopoietic
574.11	0.355984	1.04814	1.74587	0.350415	0.894915	723245	866	722379	Cholelithiasis with acute cholecystitis	digestive
134.1	0.711089	0.912927	2.30666	-0.480808	0.89806	729400	261	729139	Intestinal helminthiases	infectious diseases
446.6	1.00555	0.88059	2.85148	-1.0903	0.899367	693945	126	693819	Polyarteritis nodosa	circulatory system
286.11	0.450133	0.944803	1.82706	0.0625425	0.899623	681823	444	681379	Von willebrand's disease	hematopoietic
540	0.155788	1.01962	1.32497	0.714279	0.900728	746503	3761	742742	Appendiceal conditions	digestive
519.9	0.128376	1.01607	1.26769	0.764458	0.901143	718845	6820	712025	Symptoms involving respiratory system and other chest symptoms	respiratory
732.7	0.356138	1.04518	1.74321	0.347153	0.901248	650256	703	649553	Osteochondritis dissecans	musculoskeletal
316.1	101.121	4.61611e-06	198.196	-198.196	0.903297	652963	1265	651698	Polyneuropathy due to drugs	mental disorders
189.2	110.477	2.23883e-06	216.534	-216.534	0.906259	743848	2873	740975	Cancer of bladder	neoplasms
189.21	110.306	2.31055e-06	216.199	-216.199	0.906341	743804	2829	740975	Malignant neoplasm of bladder	neoplasms
359.2	0.197858	1.02354	1.41134	0.63574	0.906383	718065	3985	714080	Myopathy	neurological
657	0.506082	1.06115	2.05307	0.0692279	0.90664	745209	1535	743674	Infections specific to the perinatal period	pregnancy complications
368.9	0.168167	1.01985	1.34946	0.690245	0.906942	703050	3660	699390	Subjective visual disturbances	sense organs
184.1	112.33	2.33096e-06	220.167	-220.167	0.908083	717383	1499	715884	Malignant neoplasm of ovary and other uterine adnexa	neoplasms
204.2	119.704	1.20669e-06	234.619	-234.619	0.909361	733346	2152	731194	Myeloid leukemia	neoplasms
184.11	112.544	2.86873e-06	220.586	-220.586	0.90972	717080	1196	715884	Malignant neoplasm of ovary	neoplasms
204.11	119.889	1.27114e-06	234.982	-234.982	0.909844	732864	1670	731194	Lymphoid leukemia, acute	neoplasms
204.21	119.802	1.337e-06	234.811	-234.811	0.910113	733079	1885	731194	Myeloid leukemia, acute	neoplasms
204.4	116.586	1.94797e-06	228.508	-228.508	0.910204	733332	2138	731194	Multiple myeloma	neoplasms
389.3	1.0057	1.11912	3.0903	-0.852047	0.910896	677772	223	677549	Degenerative and vascular disorders of ear	sense organs
170.1	119.928	1.5117e-06	235.059	-235.059	0.911019	745530	1612	743918	Bone cancer	neoplasms
159	118.26	1.86684e-06	231.79	-231.79	0.911185	723178	1871	721307	Malignant neoplasm of other and ill-defined sites within the digestive organs and peritoneum	neoplasms
149.5	115.729	2.56177e-06	226.828	-226.828	0.911418	742172	1535	740637	Hx of malignant neoplasm of oral cavity and pharynx	neoplasms
201	120.041	1.64198e-06	235.28	-235.28	0.911649	732604	1410	731194	Hodgkin's disease	neoplasms
149.4	112.926	3.66002e-06	221.335	-221.335	0.911734	742037	1400	740637	Cancer of larynx	neoplasms
198.5	120.751	1.59912e-06	236.673	-236.673	0.911993	672767	1886	670881	Secondary malignancy of brain/spine	neoplasms
155	117.082	2.42714e-06	229.481	-229.481	0.912072	722840	1533	721307	Cancer of liver and intrahepatic bile duct	neoplasms
198.3	120.238	1.74947e-06	235.667	-235.667	0.912212	672726	1845	670881	Secondary malignant neoplasm of digestive systems	neoplasms
149.1	114.221	3.53347e-06	223.873	-223.873	0.912486	741793	1156	740637	Cancer of oropharynx	neoplasms
155.1	116.928	2.76316e-06	229.178	-229.178	0.912836	722635	1328	721307	Malignant neoplasm of liver, primary	neoplasms
145.2	115.242	3.49048e-06	225.874	-225.874	0.913174	741765	1128	740637	Cancer of tongue	neoplasms
204.12	117.691	2.75081e-06	230.674	-230.674	0.913369	732433	1239	731194	Lymphoid leukemia, chronic	neoplasms
202.22	117.822	2.78114e-06	230.93	-230.93	0.913539	732403	1209	731194	Reticulosarcoma	neoplasms
202.21	117.276	3.28838e-06	229.86	-229.86	0.914271	732304	1110	731194	Nodular lymphoma	neoplasms
157	116.887	3.72931e-06	229.098	-229.098	0.914841	722420	1113	721307	Pancreatic cancer	neoplasms
352.2	0.25183	1.02727	1.52085	0.533679	0.914932	696478	1847	694631	Facial nerve disorders [CN7]	neurological
772.6	0.335471	0.966093	1.62362	0.30857	0.9181	696088	1172	694916	Facial weakness	symptoms
198.7	119.502	4.66234e-06	234.225	-234.225	0.91818	671622	741	670881	Secondary malignant neoplasm of skin	neoplasms
794	1.0065	1.10734	3.08008	-0.865409	0.919314	749426	109	749317	Abnormal results of other function studies (bladder, pancreas, placenta, spleen, etc)	symptoms
287.1	0.380512	0.962329	1.70813	0.216525	0.91962	682008	629	681379	Spontaneous ecchymoses	hematopoietic
429.9	0.27946	1.0286	1.57634	0.480859	0.919626	684163	1479	682684	Cardiac complications, not elsewhere classified	circulatory system
856	0.711123	0.93293	2.32673	-0.46087	0.922228	699243	294	698949	Vascular complications of surgery and medical procedures	injuries & poisonings
613.8	0.225826	1.02157	1.46419	0.578947	0.924725	727279	2254	725025	Other specified disorders of breast	genitourinary
618.6	0.356487	1.03285	1.73156	0.334132	0.927763	741388	1189	740199	Vaginal enterocele, congenital or acquired	genitourinary
130	0.503486	1.0442	2.03103	0.0573659	0.931546	729475	336	729139	Spirochetal infection	infectious diseases
371.3	0.133876	0.98873	1.25113	0.726333	0.932532	648547	6718	641829	Inflammation of eyelids	sense organs
535.2	0.244317	0.980112	1.45897	0.501251	0.93447	703457	1595	701862	Atrophic gastritis	digestive
750.5	157.821	4.84277e-06	309.33	-309.33	0.938191	717280	709	716571	Congenital hypertrophic pyloric stenosis	congenital anomalies
277.51	0.410812	0.968967	1.77416	0.163774	0.938832	731993	634	731359	Lipoprotein disorders	endocrine/metabolic
579.8	0.355867	0.973232	1.67073	0.275732	0.939226	670671	755	669916	Nonspecific abnormal findings in stool contents	digestive
803.1	0.116151	0.991238	1.21889	0.763582	0.939601	631997	7377	624620	Fracture of humerus	injuries & poisonings
189.4	188.58	1.40633e-06	369.617	-369.617	0.943038	742090	1115	740975	Malignant neoplasm of other urinary organs	neoplasms
610.8	190.07	1.53412e-06	372.538	-372.538	0.943848	700783	733	700050	Other specified benign mammary dysplasias	genitourinary
202.24	194.178	1.26481e-06	380.589	-380.589	0.944242	732164	970	731194	Large cell lymphoma	neoplasms
575.1	0.355959	1.02511	1.72279	0.327431	0.944455	723254	875	722379	Cholangitis	digestive
174.2	189.968	1.83593e-06	372.338	-372.338	0.94457	706518	668	705850	Breast cancer [male]	neoplasms
150	186.854	2.47308e-06	366.234	-366.234	0.944917	721986	679	721307	Cancer of esophagus	neoplasms
204.22	196.849	1.26476e-06	385.825	-385.825	0.944998	731986	792	731194	Myeloid leukemia, chronic	neoplasms
151	191.064	2.01434e-06	374.485	-374.485	0.945274	722100	793	721307	Cancer of stomach	neoplasms
202.23	194.431	1.63614e-06	381.086	-381.086	0.945369	731896	702	731194	Lymphosarcoma	neoplasms
753.1	191.083	2.10622e-06	374.523	-374.523	0.945465	735885	519	735366	Congenital cataract and lens anomalies	congenital anomalies
275.51	0.187232	0.987299	1.35427	0.620324	0.945569	721349	3067	718282	Hypocalcemia	endocrine/metabolic
194	198.46	1.65054e-06	388.982	-388.982	0.946511	737782	474	737308	Cancer of other endocrine glands	neoplasms
190	197.299	1.81381e-06	386.706	-386.706	0.946577	737181	554	736627	Cancer of eye	neoplasms
427.11	0.126548	1.0085	1.25653	0.760463	0.946697	601785	7110	594675	Paroxysmal supraventricular tachycardia	circulatory system
159.2	194.152	2.44452e-06	380.537	-380.537	0.946936	721866	559	721307	Malignant neoplasm of small intestine, including duodenum	neoplasms
149.9	193.685	2.61191e-06	379.622	-379.622	0.947081	741150	513	740637	Cancer of of nasal cavities	neoplasms
145.3	192.299	3.19927e-06	376.907	-376.907	0.94754	741089	452	740637	Cancer of major salivary glands	neoplasms
227.2	191.283	3.49252e-06	374.914	-374.914	0.947627	737723	415	737308	Benign neoplasm of parathyroid gland	neoplasms
275.11	197.826	2.45467e-06	387.74	-387.74	0.947937	718689	407	718282	Hereditary hemochromatosis	hematopoietic
81.11	200.529	2.4507e-06	393.036	-393.036	0.948631	728879	358	728521	Acute graft-versus-host disease	infectious diseases
149.2	194.065	4.59012e-06	380.368	-380.368	0.949498	740904	267	740637	Cancer of nasopharynx	neoplasms
253.7	0.581181	1.03709	2.17621	-0.10202	0.950029	692452	345	692107	Other disorders of neurohypophysis	endocrine/metabolic
334.2	214.641	1.63132e-06	420.697	-420.697	0.950495	641990	585	641405	Anterior horn cell disease	neurological
290.12	195.772	5.73695e-06	383.714	-383.714	0.950845	668741	579	668162	Dementia with cerebral degenerations	mental disorders
988	1.00621	1.05517	3.02734	-0.917	0.957436	745063	145	744918	Toxic effect of noxious substances eaten as food	injuries & poisonings
612.1	0.503401	0.976082	1.96275	-0.0105838	0.961645	700432	382	700050	Galactorrhea	genitourinary
189.12	308.482	1.35308e-06	604.625	-604.625	0.96506	741487	512	740975	Malignant neoplasm of renal pelvis	neoplasms
209	319.797	1.04058e-06	626.803	-626.803	0.965641	749849	470	749379	Neuroendocrine tumors	neoplasms
159.4	325.328	9.10781e-07	637.644	-637.644	0.965898	721718	411	721307	Malignant neoplasm of retroperitoneum and peritoneum	neoplasms
159.3	315.657	1.78057e-06	618.688	-618.688	0.966547	721647	340	721307	Malignant neoplasm of gallbladder and extrahepatic bile ducts	neoplasms
750.11	319.238	1.607e-06	625.707	-625.707	0.966666	716792	221	716571	Esophageal atresia/tracheoesophageal fistula	congenital anomalies
225.2	326.459	1.32457e-06	639.86	-639.86	0.966931	736859	232	736627	Benign neoplasm of spinal cord, meninges	neoplasms
365.5	283.74	8.287e-06	556.131	-556.131	0.967106	690660	216	690444	Pseudoexfoliation glaucoma	sense organs
259.2	332.068	1.34688e-06	650.854	-650.854	0.967529	692451	344	692107	Carcinoid syndrome	endocrine/metabolic
204.3	324.984	1.88599e-06	636.968	-636.968	0.967647	731387	193	731194	Monocytic leukemia	neoplasms
149.3	308.909	3.94063e-06	605.461	-605.461	0.967866	740809	172	740637	Cancer of hypopharynx	neoplasms
379.51	331.949	1.56017e-06	650.62	-650.62	0.96787	653889	309	653580	Pigmentary iris degeneration	sense organs
270.2	0.450098	0.982392	1.86459	0.1002	0.968517	729017	470	728547	Disorders of amino-acid metabolism	endocrine/metabolic
334.21	349.089	1.16163e-06	684.215	-684.215	0.968773	641797	392	641405	Amyotrophic Lateral Sclerosis	neurological
767	342.366	1.79708e-06	671.037	-671.037	0.969177	695162	221	694941	Cervicocranial/Cervicobrachial syndrome	symptoms
289.1	346.41	2.13854e-06	678.963	-678.963	0.969937	663564	204	663360	Myelofibrosis	hematopoietic
731.1	326.953	6.08643e-06	640.828	-640.828	0.970699	649718	165	649553	Osteitis deformans [Paget's disease of bone]	musculoskeletal
289	0.181111	0.993418	1.3484	0.638441	0.970914	666939	3579	663360	Other diseases of blood and blood-forming organs	hematopoietic
426.25	361.301	2.30047e-06	708.15	-708.15	0.971336	594860	185	594675	Other heart block	circulatory system
803.21	0.279347	1.00927	1.55679	0.461753	0.973642	626063	1443	624620	Colles' fracture	injuries & poisonings
428.3	0.115915	0.996275	1.22347	0.769081	0.974313	694767	12083	682684	Heart failure with reduced EF [Systolic or combined heart failure]	circulatory system
377.3	0.251965	1.00797	1.50182	0.514114	0.97488	655112	1532	653580	Optic neuritis/neuropathy	sense organs
626.8	0.225903	0.993467	1.43624	0.550698	0.976854	654339	1919	652420	Infertility, female	genitourinary
795.8	524.8	5.42279e-07	1028.61	-1028.61	0.978068	748996	365	748631	Abnormal tumor markers	symptoms
164	535.307	4.2907e-07	1049.2	-1049.2	0.978149	741817	296	741521	Cancer of intrathoracic organs	neoplasms
145.4	518.663	1.13914e-06	1016.58	-1016.58	0.97895	740830	193	740637	Cancer of the gums	neoplasms
255.22	557.654	4.86098e-07	1093	-1093	0.979203	692314	207	692107	Mineralocorticoid deficiency	endocrine/metabolic
446.2	0.580984	1.01521	2.15394	-0.123521	0.979275	694331	512	693819	Acute febrile mucocutaneous lymph node syndrome (Kawasaki disease)	circulatory system
795.81	526.738	1.26721e-06	1032.41	-1032.41	0.979434	748773	142	748631	Elevated carcinoembryonic antigen [CEA]	symptoms
270.35	518.755	1.60293e-06	1016.76	-1016.76	0.979479	728699	152	728547	Macroglobulinemia	endocrine/metabolic
259.8	557.336	6.10753e-07	1092.38	-1092.38	0.979518	692268	161	692107	Polyglandular activity in multiple endocrine adenomatosis	endocrine/metabolic
781.1	536.958	1.08973e-06	1052.44	-1052.44	0.979601	733070	135	732935	Loss of height	symptoms
550.3	538.384	1.76458e-06	1055.23	-1055.23	0.980369	700471	103	700368	Femoral hernia	digestive
132.1	0.503691	1.01234	1.99958	0.0251098	0.980567	729634	495	729139	Pediculosis and phthirus infestation	infectious diseases
117.3	571.109	1.12627e-06	1119.37	-1119.37	0.980867	676615	123	676492	Blastomycotic infection	infectious diseases
556.11	568.648	1.71047e-06	1114.55	-1114.55	0.98137	619340	150	619190	Angiodysplasia of intestine (without mention of hemorrhage)	digestive
540.1	0.159592	0.99669	1.30949	0.683891	0.983426	746416	3674	742742	Appendicitis	digestive
187.1	781.828	5.20693e-07	1532.38	-1532.38	0.985236	736230	166	736064	Malignant neoplasm of unspecified male genital organ	neoplasms
609.2	811.985	5.36643e-07	1591.49	-1591.49	0.985814	689072	147	688925	Abnormal spermatozoa	genitourinary
145.5	857.952	4.39278e-07	1681.59	-1681.59	0.986387	740804	167	740637	Cancer of the mouth floor	neoplasms
117.4	0.503171	0.991694	1.97791	0.00547909	0.986774	676916	424	676492	Aspergillosis	infectious diseases
500.2	847.178	1.09981e-06	1660.47	-1660.47	0.987079	650597	117	650480	Pneumoconiosis	respiratory
716.8	917.84	4.49406e-07	1798.97	-1798.97	0.987295	684430	113	684317	Palindromic rheumatism	musculoskeletal
499	0.318618	1.00432	1.62881	0.379825	0.989213	749424	804	748620	Cystic fibrosis	respiratory
350.1	0.106156	1.00137	1.20944	0.793307	0.989684	706033	8855	697178	Abnormal involuntary movements	neurological
540.11	0.163719	0.997948	1.31884	0.67706	0.98999	746235	3493	742742	Acute appendicitis	digestive
448	0.7119	0.994678	2.39	-0.400646	0.994019	694012	193	693819	Disease of capillaries	circulatory system
816	0.450032	0.997411	1.87947	0.115348	0.995404	718581	484	718097	Cerebral laceration and contusion	injuries & poisonings
619.5	0.260296	0.998821	1.509	0.488641	0.996384	717084	1479	715605	Noninflammatory disorders of vulva and perineum	genitourinary
